# Supplementary material for: Defining Functions of Mannoproteins in Saccharomyces cerevisiae by High-Dimensional Morphological Phenotyping
Source: J Fungi (Basel). 2021 Sep 17;7(9):769. doi: 10.3390/jof7090769 (PMC8466635; doi:10.3390/jof7090769)
Supplement: Supplementary file 1 [file jof-07-00769-s001.zip › Supplementary Tables.xlsx]

## Sheet: Table S1
Table S1. List of 36 cell wall mannoprotein strains.
Gene (Aliases1)	ORF	Paralog1	Gene family2	Duplication type1,3,4	Protein type2	Genotype	Source/Background
CCW12	YLR110C	FLO5	-	SSD	GPI-CWP	MATa his3 leu2 met15 ura3 ccw12::KanR	EUROSCARF/BY4741
CCW14 (ICWP, SSR1)	YLR390W-A	-	-	-	GPI-CWP	MATa his3 leu2 met15 ura3 ccw14::KanR	EUROSCARF/BY4741
CWP1 (YJU1)	YKL096W	-	Tip1 family	-	GPI-CWP	MATa his3 leu2 met15 ura3 cwp1::KanR	EUROSCARF/BY4741
CWP2 (LPR1)	YKL096W-A	-	Tip1 family	-	GPI-CWP	MATa his3 leu2 met15 ura3 cwp2::KanR	EUROSCARF/BY4741
DAN1 (CCW13)	YJR150C	DAN4	Tip1 family	SSD	GPI-CWP	MATa his3 leu2 met15 ura3 dan1::KanR	EUROSCARF/BY4741
DSE2	YHR143W	-	Daughter cell specific	-	GPI-CWP	MATa his3 leu2 met15 ura3 dse2::KanR	EUROSCARF/BY4741
ECM33	YBR078W	PST1	Sps2 family	WGD	GPI-CWP	MATa his3 leu2 met15 ura3 ecm33::KanR	EUROSCARF/BY4741
EGT2	YNL327W	-	Daughter cell specific	-	GPI-CWP	MATa his3 leu2 met15 ura3 egt2::KanR	EUROSCARF/BY4741
FIG2	YCR089W	AGA1	-	WGD	GPI-CWP	MATa his3 leu2 met15 ura3 fig2::KanR	EUROSCARF/BY4741
FIT1	YDR534C	FIT3	Iron binding	SSD	GPI-CWP	MATa his3 leu2 met15 ura3 fit1::KanR	EUROSCARF/BY4741
FIT2	YOR382W	-	Iron binding	-	GPI-CWP	MATa his3 leu2 met15 ura3 fit2::KanR	EUROSCARF/BY4741
FIT3	YOR383C	FIT1	Iron binding	SSD	GPI-CWP	MATa his3 leu2 met15 ura3 fit3::KanR	EUROSCARF/BY4741
FLO1 (FLO2, FLO4)	YAR050W	FLO9	Flocculin	SSD	GPI-CWP	MATa his3 leu2 met15 ura3 flo1::KanR	EUROSCARF/BY4741
FLO10	YKR102W	FLO5	Flocculin	SSD	GPI-CWP	MATa his3 leu2 met15 ura3 flo10::KanR	EUROSCARF/BY4741
FLO11 (STA4, MUC1)	YIR019C	BSC1	Flocculin	SSD	GPI-CWP	MATa his3 leu2 met15 ura3 flo11::KanR	EUROSCARF/BY4741
PST1 (HPF2)	YDR055W	ECM33	Sps2 family	WGD	GPI-CWP	MATa his3 leu2 met15 ura3 pst1::KanR	EUROSCARF/BY4741
SAG1 (AGα1)	YJR004C	-	MATα agglutinin	-	GPI-CWP	MATa his3 leu2 met15 ura3 sag1::KanR	EUROSCARF/BY4741
SED1	YDR077W	SPI1	-	WGD	GPI-CWP	MATa his3 leu2 met15 ura3 sed1::KanR	EUROSCARF/BY4741
SPI1	YER150W	SED1	-	WGD	GPI-CWP	MATa his3 leu2 met15 ura3 spi1::KanR	EUROSCARF/BY4741
SPS2	YDR522C	SPS22	Sps2 family	WGD	GPI-CWP	MATa his3 leu2 met15 ura3 sps2::KanR	EUROSCARF/BY4741
SPS22	YCL048W	SPS2	Sps2 family	WGD	GPI-CWP	MATa his3 leu2 met15 ura3 sps22::KanR	EUROSCARF/BY4741
TIP1	YBR067C	TIR2	Tip1 family	SSD	GPI-CWP	MATa his3 leu2 met15 ura3 tip1::KanR	EUROSCARF/BY4741
TIR1 (SRP1)	YER011W	-	Tip1 family	-	GPI-CWP	MATa his3 leu2 met15 ura3 tir1::KanR	EUROSCARF/BY4741
TIR2 (SRP2)	YOR010C	TIP1, TIR3, TIR4	Tip1 family	SSD/WGD/SSD	GPI-CWP	MATa his3 leu2 met15 ura3 tir2::KanR	EUROSCARF/BY4741
TIR3 (YIB1)	YIL011W	TIR2	Tip1 family	WGD	GPI-CWP	MATa his3 leu2 met15 ura3 tir3::KanR	EUROSCARF/BY4741
TIR4	YOR009W	TIR3	Tip1 family	SSD	GPI-CWP	MATa his3 leu2 met15 ura3 tir4::KanR	EUROSCARF/BY4741
CIS3 (PIR4, CCW11, CCW5, SCW8)	YJL158C	HSP150	Internal repeat	SSD	Non-GPI-CWP	MATa his3 leu2 met15 ura3 cis3::KanR	EUROSCARF/BY4741
HSP150 (CCW7, ORE1, PIR2)	YJL159W	CIS3, PIR1, PIR3	Internal repeat	SSD/SSD/WGD	Non-GPI-CWP	MATa his3 leu2 met15 ura3 hsp150::KanR	EUROSCARF/BY4741
PIR1 (CCW6)	YKL164C	HSP150, PIR5	Internal repeat	SSD/WGD	Non-GPI-CWP	MATa his3 leu2 met15 ura3 pir1::KanR	EUROSCARF/BY4741
PIR3 (CCW8)	YKL163W	HSP150	Internal repeat	WGD	Non-GPI-CWP	MATa his3 leu2 met15 ura3 pir3::KanR	EUROSCARF/BY4741
SRL1	YOR247W	SVS1	-	WGD	Non-GPI-CWP	MATa his3 leu2 met15 ura3 srl1::KanR	EUROSCARF/BY4741
SUN4 (SCW3)	YNL066W	SIM1	SUN family	WGD	Non-GPI-CWP	MATa his3 leu2 met15 ura3 sun4::KanR	EUROSCARF/BY4741
AGA1	YNR044W	FIG2	MATα agglutinin	WGD	GPI-CWP	Not Available5	Not Available5
DAN4	YJR151C	-	Tip1 family	-	GPI-CWP	Not Available5	Not Available5
FLO5	YHR211W	FLO1	Flocculin	SSD	GPI-CWP	Not Available5	Not Available5
FLO9	YAL063C	-	Flocculin	-	GPI-CWP	Not Available5	Not Available5
1Obtained from Saccharomyces Genome Database (SGD; https://www.yeastgenome.org/)
2Described in Orlean (2012)
3Described in Diss et al. (2017)
4SSD: Small-Scale Duplication; WGD: Whole-Genome Duplication
5Morphological phenotype was not examined in this study due to cell aggregation in BY4741 background.

## Sheet: Table S2
Table S2. List of strains to study kinetics of mannoproteins (Dse2 and Egt2; cluster V) and proteins involved in the cytokinesis and cell separation.
Strain	Genotype	Source
BY4742	MATα his3Δ1 leu2Δ0 lys2Δ0 ura3Δ0	Brachmann et al. (1998)
YEF9109	As BY4742 except fks1(1-789)::GFPEnvy-FKS1-LEU2	This study1
YEF9928	As BY4742 except CHS3-GFP-His3MX6	This study
YEF10764	As BY4742 except DSE2-GFPEnvy-CaURA3	This study
YEF10767	As BY4742 except egt2::URA-KAN	This study2
YEF10853	As BY4742 except MYO1-GFPEnvy-CaURA3	This study
YEF10856	As BY4742 except CHS3-GFP-His3MX6 TUB1::proHIS3-ymScarlet-I-TUB1-tTUB1-HPH	This study3
YEF10857	As BY4742 except fks1(1-789)::GFPEnvy-FKS1-LEU2 TUB1::proHIS3-ymScarlet-I-TUB1-tTUB1-HPH	This study3
YEF10858	As BY4742 except DSE2-GFPEnvy-CaURA3 TUB1::proHIS3-ymScarlet-I-TUB1-tTUB1-HPH	This study3
YEF10860	As BY4742 except CTS1-GFPEnvy-KanMX6	This study
YEF10861	As BY4742 except MYO1-GFPEnvy-CaURA3 TUB1::proHIS3-ymScarlet-I-TUB1-tTUB1-HPH	This study3
YEF10862	As BY4742 except CTS1-GFPEnvy-KanMX6 TUB1::proHIS3-ymScarlet-I-TUB1-tTUB1-HPH	This study3
YEF10876	As BY4742 except GFPEnvy-EGT2	This study4
YEF10879	As BY4742 except GFPEnvy-EGT2 TUB1::proHIS3-ymScarlet-I-TUB1-tTUB1-HPH	This study3
Except where noted, strains were constructed using the PCR method described by Longtine et al. (1998), Lee et al., (2013), or Slubowski et al., (2015) for gene tagging of its chromosomal locus. Primers used for the PCR, see Table S3.
1HindIII-digested plasmid pRS305-ENVY-FKS1(1-789) was integrated into the FKS1 locus. As a result, the endogenous copy is truncated.
2A DNA fragment (URA3-KanMX6 cassette) was amplified by PCR using the plasmid pFA6a- URA3-KanMX6 as the template DNA and the pair of primers with 40-bp flanking sequence of the site between codons 26 and 27 in the EGT2 ORF (P1481 and P1482), and the DNA fragment was then inserted at the EGT2 locus of BY4742.
3XbaI-digested plasmid proHIS3-ymScarlet-I-TUB1-tTUB1-HPH was integrated into the TUB1 locus.
4A DNA fragment (GFPEnvy) was amplified by PCR using the plasmid pFA6a-GFPEnvy- KanMX6 as the template DNA and the pair of primers with 40-bp flanking sequence of the site between codons 26 and 27 in the EGT2 ORF (P1481 and P1483), and the DNA fragment was then used to replace the URA3-KanMX6 cassette in YEF10767.

## Sheet: Table S3
Table S3. Oligonucleotides (A) and plasmids (B) used in this study.
A
Oligonucleotides	Function	Identifier
P1366-F-DSE2-240up-from-stop: TACCTCTACACTGGTACCCTCTTCTAG	For the amplification of DSE2-GFPEnvy-CaURA3	P1366
P648-R-DSE2-R3: GAAAACAAATAGAAAAGAATGCACCACCATTATGCCTAAGCGTCGATGAATTCGAGCTCG	For the amplification of DSE2-GFPEnvy-CaURA3	P648
P1481-EGT2-40up-P26-I27-F1: GATACTCGGCCTAGCAAACGCTCTCACACAAACGCAACCGCGGATCCCCGGGTTAATTAA	For the construction of egt2::URA3-KanMX6 and GFPEnvy-EGT2	P1481
P1482-EGT2-40down-P26-I27-R1: TTTTGGTATAACTATCTGTTATTTGAATATCTTTTAAAATGAATTCGAGCTCGTTTAAAC	For the construction of egt2::URA3-KanMX6	P1482
P1483-EGT2-40down-P26-I27-ENVY: TTTTGGTATAACTATCTGTTATTTGAATATCTTTTAAAATTTTGTACAATTCGTCCATTC	For the construction of GFPEnvy-EGT2	P1483
Cts1-ORF-F: TGACGAGTAGCACCAAGA	For the amplification of CTS1-GFPEnvy-KanMX6	N/A
Cts1-Flank-R: TTTCACCGCATAGACCAA	For the amplification of CTS1-GFPEnvy-KanMX6	N/A
Myo1-159bp-US-Stop: CTAGCGAATAAAAATAGAAGCGA	For the amplification of MYO1-GFPEnvy-CaURA3	N/A
Myo1-249bp-DS-Stop: GATACGGGGTGAAAGAGTT	For the amplification of MYO1-GFPEnvy-CaURA3	N/A
F077-CHS3-250up-from-Stop: TGCTACGAGATGGTCGTACCTATGGTGG	For the amplification of CHS3-GFP-His3MX6	P75
R062-CHS3-250down-from-Stop: GCCACAGATAAATAGTGGCATATTCGG	For the amplification of CHS3-GFP-His3MX6	P379
F-his3pro-XhoI-ymScarlet: AAAGCCTCGAGATGGTGTCTAAAGGTGAAGCCGTTATCA	For the construction of YIp128-proACT1-lifeact-ymScarlet-I-tADH1	P1409
R-his3pro-XhoI-ymScarlet: CCATCTCGAGGCTTTGCCTTCGTTTATCTTGCCTGCTCAT	For the construction of YIp128-proACT1-lifeact-ymScarlet-I-tADH1	P1410				`
F-ymScarlet-BamHI-TUB1: CAAGGGATCCATGAGAGAAGTTATTAGTATTAATGGTATGT	For the construction of YIp128-proACT1-lifeact-ymScarlet-I-tADH1	P1411
R-ymScarlet-BamHI-TUB1: CTCATGGATCCCTTGTACAACTCATCCATACCACCAGTA	For the construction of YIp128-proACT1-lifeact-ymScarlet-I-tADH1	P1412
F224-pRS-MCS(SacI)-FKS1-1kb-up: CTATAGGGCGAATTGGAGCTCGCAAAAAGAGAAAACCAAGGGACCAGAACAAAGCAAAAT	For the construction of pRS305-ENVY-FKS1(1-789)	P222
R195-pRS-MCS(ApaI)-FKS1-aa790-with-stop: CAAAAGCTGGGTACCGGGCCCCTAAGTTCTTTTACCTTCGATTTCAGATGGAACTTGATG	For the construction of pRS305-ENVY-FKS1(1-789)	P512
B
Plasmids	Source	Identifier
pFA6a-GFPEnvy-KanMX6	Okada et al. (2021)	BiLab collection#E2341
pFA6a-URA3-KanMX6	Onishi, et al. (2013)	N/A
pFA6a-link-GFPEnvy-CaURA3	This study	BiLab collection#E2281
pFA6a-link-GFPEnvy-KanMX6	Okada et al. (2021)	BiLab collection#E2282
pFA6a-link-yoEGFP-SpHIS5	Lee, et al. (2013)	Addgene Cat#44836
pFA6a-link-yomApple-CaURA3	Lee, et al. (2013)	Addgene Cat#44879
pHis3:mRuby2-Tub1+3’UTR::HPH (bWL715)	Markus, et al. (2015)	N/A
proHIS3-ymScarlet-I-TUB1-tTUB1-HPH	This study	BiLab collection#E2614
pRS305	Sikorski and Hieter (1989)	N/A
pRS305-ENVY-FKS1(1-789)	This study	BiLab collection#E2360
pRS316-ENVY-FKS1(1-789)	Okada et al. (2021)	BiLab collection#E2356

## Sheet: Table S4
Table S4. Parameters showed statistically significant difference at least in one mutant compared with the null distribution (Wald test, FDR=0.05).
Parameter ID1	PDF2	Lowest P value	Description3
CCV128_A1B	Reverse Gumbel	4.11e-34	Coefficient_of_variation_of_C128_A1B
CCV103_A1B	Reverse Gumbel	3.76e-33	Coefficient_of_variation_of_C103_A1B
CCV112_A1B	Reverse Gumbel	1.61e-32	Coefficient_of_variation_of_C112_A1B
CCV12-1_A1B	Reverse Gumbel	5.21e-31	Coefficient_of_variation_of_C12-1_A1B
C114_A1B	Weibull	3.85e-29	Bud_axis_ratio
C115_A	Beta	4.9e-28	Whole_cell_axis_ratio
C115_A1B	Logit Normal	6.84e-26	Mother_axis_ratio
C109_A1B	Weibull	1.33e-24	Neck_width
C126_A	Weibull	1.03e-23	Brightness_difference_of_cell_wall
C115_C	Logit Normal	4.72e-23	Mother_axis_ratio
C114_C	Inverse Gamma	1.51e-21	Bud_axis_ratio
CCV103_A	Reverse Gumbel	6.96e-19	Coefficient_of_variation_of_C103_A
DCV118_A1B	Logistic	2.27e-18	Coefficient_of_variation_of_D118_A1B
C126_A1B	Weibull	2.4e-18	Brightness_difference_of_cell_wall
CCV12-2_C	Normal	7.74e-17	Coefficient_of_variation_of_C12-2_C
C106_A1B	Weibull	7.93e-17	Bud_direction
CCV11-2_C	Normal	1.65e-16	Coefficient_of_variation_of_C11-2_C
CCV104_A1B	Reverse Gumbel	4.32e-16	Coefficient_of_variation_of_C104_A1B
CCV12-1_A	Reverse Gumbel	7.2e-16	Coefficient_of_variation_of_C12-1_A
D132_A1B	Weibull	1.05e-15	Distance_between_nuclear_brightest_point_and_middle_point_of_neck
C117_C	Logit Normal	7.18e-15	Cell_outline_ratio
C104_C	Weibull	7.76e-15	Short_axis_length_in_mother
D110_A1B	Weibull	9.43e-15	Distance_between_nuclear_gravity_center_and_middle_point_of_neck
C109_C	Inverse Gamma	1.4e-14	Neck_width
C116_C	Inverse Gamma	1.65e-14	Axis_ratio_ratio
CCV11-1_A	Reverse Gumbel	2.23e-14	Coefficient_of_variation_of_C11-1_A
CCV11-1_A1B	Reverse Gumbel	4.08e-14	Coefficient_of_variation_of_C11-1_A1B
CCV101_C	Reverse Gumbel	4.47e-14	Coefficient_of_variation_of_C101_C
CCV102_C	Reverse Gumbel	5.3e-14	Coefficient_of_variation_of_C102_C
D152_A1B	Weibull	1.02e-13	Mobility_of_nucleus_in_mother
C106_C	Weibull	2.32e-13	Bud_direction
C125_C	Beta Binomial	2.66e-13	Large_bud_ratio
C104_A1B	Weibull	3.75e-13	Short_axis_length_in_mother
C126_C	Weibull	5.76e-13	Brightness_difference_of_cell_wall
C118_C	Logit Normal	6.8e-13	Cell_size_ratio
C124_C	Beta Binomial	6.97e-13	Medium_bud_ratio
CCV104_A	Reverse Gumbel	8.04e-13	Coefficient_of_variation_of_C104_A
C13_A	Inverse Gamma	1.08e-12	Whole_cell_fitness_for_ellipse
CCV103_C	Reverse Gumbel	1.23e-12	Coefficient_of_variation_of_C103_C
C125	Beta Binomial	1.62e-12	large_bud_ratio_to_buded_cells
C116_A1B	Weibull	1.78e-12	Axis_ratio_ratio
DCV102_A	Reverse Gumbel	2.33e-12	Coefficient_of_variation_of_D102_A
DCV185_C	Reverse Gumbel	5.22e-12	Coefficient_of_variation_of_D185_C
C11-1_C	Weibull	5.57e-12	Mother_cell_size
CCV113_C	Reverse Gumbel	2.55e-11	Coefficient_of_variation_of_C113_C
C122	Beta Binomial	2.71e-11	large_bud_ratio
CCV108_C	Normal	3.61e-11	Coefficient_of_variation_of_C108_C
D202	Beta Binomial	3.78e-11	nuclear_C_ratio
C12-2_C	Weibull	3.86e-11	Bud_cell_outline_length
D209	Beta Binomial	3.95e-11	nuclear_C_ratio_to_budded_cells
D216	Beta Binomial	4.49e-11	nuclear_C_ratio_to_nuclear_A1BC_cells
D213	Beta Binomial	4.66e-11	nuclear_C_ratio_to_nuclear_AA1BC_cells
D143_A1B	Gamma	4.9e-11	Distance_between_nuclear_outline_point_D6-1_and_middle_point_of_neck
CCV12-1_C	Reverse Gumbel	5.24e-11	Coefficient_of_variation_of_C12-1_C
CCV128_C	Reverse Gumbel	5.3e-11	Coefficient_of_variation_of_C128_C
D162_C	Inverse Gamma	6.15e-11	Angle_between_D1-1D1-2_and_C1C4-1
C128_C	Weibull	7.51e-11	Distance_between_middle_point_of_neck_and_mother_hip
DCV126_A1B	Logistic	8.8e-11	Coefficient_of_variation_of_D126_A1B
A109	Beta Binomial	1.41e-10	actin_e_ratio
A119	Binomial	1.5e-10	actin_f_ratio_to_budded_cells
C11-2_C	Weibull	1.76e-10	Bud_cell_size
C104_A	Weibull	1.91e-10	Short_axis_length_in_whole_cell
C11-1_A1B	Weibull	2.95e-10	Mother_cell_size
C108_C	Weibull	3.91e-10	Short_axis_length_in_bud
C112_C	Weibull	4.48e-10	Distance_between_middle_point_of_neck_and_mother_center
DCV186_C	Reverse Gumbel	6.1e-10	Coefficient_of_variation_of_D186_C
A110	Beta Binomial	6.16e-10	actin_f_ratio
CCV11-1_C	Reverse Gumbel	7.12e-10	Coefficient_of_variation_of_C11-1_C
DCV131_C	Reverse Gumbel	8.87e-10	Coefficient_of_variation_of_D131_C
CCV101_A1B	Logistic	1.17e-09	Coefficient_of_variation_of_C101_A1B
C12-1_A	Weibull	1.26e-09	Whole_cell_outline_length
CCV110_A1B	Logistic	1.41e-09	Coefficient_of_variation_of_C110_A1B
D143_C	Weibull	1.56e-09	Distance_between_nuclear_outline_point_D6-1_in_mother_and_middle_point_of_neck
C11-1_A	Weibull	1.94e-09	Whole_cell_size
C107_C	Weibull	3.18e-09	Long_axis_length_in_bud
C111_C	Weibull	3.78e-09	Distance_between_bud_tip_and_mother_short_axis_extension
D214	Beta Binomial	3.88e-09	nuclear_A1_ratio_to_nuclear_A1BC_cells
D207	Beta Binomial	4.97e-09	nuclear_A1_ratio_to_budded_cells
C105_C	Weibull	5.45e-09	Neck_position
A106	Beta Binomial	6.68e-09	actin_b_ratio
ACV7-1_A1B	Reverse Gumbel	6.72e-09	Coefficient_of_variation_of_A7-1_A1B
C12-1_C	Weibull	6.85e-09	Mother_cell_outline_length
A108_C	Binomial	7.79e-09	Actin_d_iso_ratio
C102_C	Weibull	9.61e-09	Whole_cell_outline_length
D151_C	Inverse Gamma	1.19e-08	Ratio_of_distance_between_each_nucleus_and_middle_point_of_neck
C128_A1B	Weibull	1.43e-08	Distance_between_middle_point_of_neck_and_mother_hip
CCV115_A	Reverse Gumbel	1.61e-08	Coefficient_of_variation_of_C115_A
A112_C	Binomial	1.8e-08	Actin_cd_ratio
C103_C	Weibull	2.14e-08	Long_axis_length_in_mother
D158_C	Weibull	2.27e-08	Angle_between_D1-1D1-2_and_C1-1C1-2
C103_A	Weibull	2.72e-08	Long_axis_length_in_whole_cell
A9_C	Beta	2.74e-08	Proportion_of_actin_region_at_neck
D174_C	Weibull	2.74e-08	Maximal_distance_between_nuclear_gravity_center_and_nuclear_outline_in_bud
DCV181_A1B	Reverse Gumbel	2.98e-08	Coefficient_of_variation_of_D181_A1B
D146_C	Gamma	3.75e-08	Distance_between_nuclear_outline_point_D8_in_bud_and_bud_tip
CCV112_C	Logistic	4.15e-08	Coefficient_of_variation_of_C112_C
C113_C	Weibull	4.21e-08	Distance_between_bud_tip_and_mother_long_axis_through_middle_point_of_neck
D177_C	Weibull	4.5e-08	Nuclear_long_axis_length_in_bud
C105_A1B	Gamma	4.6e-08	Neck_position
D163_C	Inverse Gamma	4.8e-08	Angle_between_D2-1D2-2_and_C1C4-1
D159_C	Weibull	5.09e-08	Angle_between_D2-1D2-2_and_C1-1C1-2
C101_C	Weibull	5.22e-08	Whole_cell_size
D169_A1B	Weibull	5.58e-08	Angle_between_C4-1D1-1_and_C4-1C1
DCV14-1_C	Reverse Gumbel	5.75e-08	Coefficient_of_variation_of_D14-1_C
A118	Beta Binomial	6.89e-08	actin_e_ratio_to_budded_cells
D102_A	Weibull	6.98e-08	Distance_between_nuclear_gravity_center_and_mother_tip
C111_A1B	Weibull	7.14e-08	Distance_between_bud_tip_and_mother_short_axis_extension
CCV115_A1B	Reverse Gumbel	7.23e-08	Coefficient_of_variation_of_C115_A1B
A111	Beta Binomial	8.82e-08	actin_ae_ratio
D109_C	Weibull	9.78e-08	Distance_between_nuclear_gravity_center_in_bud_and_middle_point_of_neck
DCV127_A	Reverse Gumbel	1.01e-07	Coefficient_of_variation_of_D127_A
C112_A1B	Weibull	1.04e-07	Distance_between_middle_point_of_neck_and_mother_center
C101_A1B	Weibull	1.12e-07	Whole_cell_size
DCV172_A1B	Reverse Gumbel	1.34e-07	Coefficient_of_variation_of_D172_A1B
C13_A1B	Inverse Gamma	1.78e-07	Mother_cell_fitness_for_ellipse
D179_A	Weibull	2.13e-07	Nuclear_minimum_radius
D186_C	Weibull	2.43e-07	Total_length_of_two_straight_segments_D12-1C4-1_and_D12-2C4-1
ACV101_A	Normal	2.6e-07	Coefficient_of_variation_of_A101_A
D147_A1B	Beta	3.05e-07	Relative_distance_of_nuclear_gravity_center_to_mother_center
D185_C	Weibull	3.11e-07	Total_length_of_two_straight_segments_D11-1C4-1_and_D11-2C4-1
A112	Beta Binomial	3.23e-07	actin_bcd_ratio
C12-1_A1B	Weibull	3.35e-07	Mother_cell_outline_length
D14-1_A	Weibull	3.43e-07	Nuclear_size
A122_A1B	Gamma	3.49e-07	Number_of_bright_actin_patches
CCV104_C	Reverse Gumbel	3.78e-07	Coefficient_of_variation_of_C104_C
D127_A	Weibull	4.29e-07	Distance_between_nuclear_brightest_point_and_cell_tip
A117	Binomial	4.46e-07	actin_d_iso_ratio_to_budded_cells
DCV176_A	Reverse Gumbel	5.81e-07	Coefficient_of_variation_of_D176_A
DCV104_A1B	Normal	6.64e-07	Coefficient_of_variation_of_D104_A1B
C125_A1B	Binomial	6.93e-07	Large_bud_ratio
D173_A	Weibull	7e-07	Maximal_distance_between_nuclear_gravity_center_and_nuclear_outline
D107_A1B	Logit Normal	8.5e-07	Ratio_of_D104_to_C103
CCV110_C	Logistic	8.72e-07	Coefficient_of_variation_of_C110_C
ACV102_C	Logistic	8.76e-07	Coefficient_of_variation_of_A102_C
A8-1_C	Inverse Gamma	9.59e-07	Total_brightness_of_actin_region_in_mother
D108_C	Gamma	9.78e-07	Distance_between_nuclear_gravity_center_in_mother_and_middle_point_of_neck
1IDs of morphological parameters (Ohya et al., 2005) inclduing actin, cell wall and nucleus parameters.
2PDF = Probability Distribution Function
3Descriptions of the morphological parameters (Ohya et al., 2005 ).

## Sheet: Table S5
Table S5. Significant loadings of first five PC spaces (used for GMM clustering) after Bonferroni correction (t test, p<0.05).
Parameter ID1	PC sapce	Loading	P value	Description2
D132_A1B	PC1	-0.912668	3.45891e-13	Distance_between_nuclear_brightest_point_and_middle_point_of_neck
C104_C	PC1	-0.894977	4.87492e-12	Short_axis_length_in_mother
C104_A1B	PC1	-0.894331	5.321e-12	Short_axis_length_in_mother
CCV11-2_C	PC1	-0.887764	1.25627e-11	Coefficient_of_variation_of_C11-2_C
D110_A1B	PC1	-0.87924	3.55076e-11	Distance_between_nuclear_gravity_center_and_middle_point_of_neck
A112	PC2	-0.865835	1.56879e-10	actin_bcd_ratio
C11-1_C	PC1	-0.859428	3.02038e-10	Mother_cell_size
CCV12-2_C	PC1	-0.857908	3.51125e-10	Coefficient_of_variation_of_C12-2_C
C109_C	PC1	-0.852955	5.67024e-10	Neck_width
C109_A1B	PC1	-0.848033	8.97589e-10	Neck_width
C11-1_A1B	PC1	-0.846063	1.07393e-09	Mother_cell_size
C128_C	PC1	-0.843028	1.40882e-09	Distance_between_middle_point_of_neck_and_mother_hip
D109_C	PC2	-0.837382	2.30005e-09	Distance_between_nuclear_gravity_center_in_bud_and_middle_point_of_neck
C128_A1B	PC1	-0.820473	8.99579e-09	Distance_between_middle_point_of_neck_and_mother_hip
C112_C	PC1	-0.816759	1.19104e-08	Distance_between_middle_point_of_neck_and_mother_center
CCV108_C	PC1	-0.81624	1.23802e-08	Coefficient_of_variation_of_C108_C
D143_C	PC1	-0.815719	1.28694e-08	Distance_between_nuclear_outline_point_D6-1_in_mother_and_middle_point_of_neck
CCV112_A1B	PC1	-0.8144	1.41887e-08	Coefficient_of_variation_of_C112_A1B
C126_A	PC2	-0.813553	1.50996e-08	Brightness_difference_of_cell_wall
D102_A	PC2	-0.809859	1.97376e-08	Distance_between_nuclear_gravity_center_and_mother_tip
C101_A1B	PC1	-0.805799	2.632e-08	Whole_cell_size
C12-1_C	PC1	-0.805354	2.71529e-08	Mother_cell_outline_length
DCV185_C	PC1	-0.803439	3.10172e-08	Coefficient_of_variation_of_D185_C
C103_A	PC2	-0.799379	4.09364e-08	Long_axis_length_in_whole_cell
D127_A	PC2	-0.796604	4.93095e-08	Distance_between_nuclear_brightest_point_and_cell_tip
C112_A1B	PC1	-0.796536	4.95321e-08	Distance_between_middle_point_of_neck_and_mother_center
CCV103_A1B	PC1	-0.796375	5.00672e-08	Coefficient_of_variation_of_C103_A1B
CCV12-1_A1B	PC1	-0.786964	9.21165e-08	Coefficient_of_variation_of_C12-1_A1B
D143_A1B	PC1	-0.786596	9.42824e-08	Distance_between_nuclear_outline_point_D6-1_and_middle_point_of_neck
DCV102_A	PC3	-0.785541	1.00744e-07	Coefficient_of_variation_of_D102_A
C12-1_A1B	PC1	-0.784568	1.07069e-07	Mother_cell_outline_length
CCV101_C	PC1	-0.781657	1.28208e-07	Coefficient_of_variation_of_C101_C
D108_C	PC1	-0.775165	1.89799e-07	Distance_between_nuclear_gravity_center_in_mother_and_middle_point_of_neck
C12-2_C	PC2	-0.774009	2.03259e-07	Bud_cell_outline_length
C104_A	PC1	-0.773159	2.137e-07	Short_axis_length_in_whole_cell
CCV102_C	PC1	-0.77263	2.20453e-07	Coefficient_of_variation_of_C102_C
C126_C	PC2	-0.772597	2.20877e-07	Brightness_difference_of_cell_wall
CCV110_A1B	PC1	-0.763356	3.75241e-07	Coefficient_of_variation_of_C110_A1B
CCV11-1_A	PC3	-0.761405	4.18393e-07	Coefficient_of_variation_of_C11-1_A
C126_A1B	PC2	-0.758132	5.01085e-07	Brightness_difference_of_cell_wall
C107_C	PC2	-0.756977	5.33656e-07	Long_axis_length_in_bud
CCV128_A1B	PC1	-0.756913	5.35511e-07	Coefficient_of_variation_of_C128_A1B
D179_A	PC1	-0.756424	5.49923e-07	Nuclear_minimum_radius
CCV128_C	PC1	-0.748887	8.21738e-07	Coefficient_of_variation_of_C128_C
C103_C	PC1	-0.742689	1.13157e-06	Long_axis_length_in_mother
DCV127_A	PC3	-0.742391	1.14887e-06	Coefficient_of_variation_of_D127_A
C115_C	PC1	-0.737391	1.47707e-06	Mother_axis_ratio
CCV104_A	PC3	-0.737086	1.49961e-06	Coefficient_of_variation_of_C104_A
DCV118_A1B	PC1	-0.730299	2.08986e-06	Coefficient_of_variation_of_D118_A1B
D14-1_A	PC1	-0.72991	2.12931e-06	Nuclear_size
C101_C	PC1	-0.728918	2.23317e-06	Whole_cell_size
CCV12-1_A	PC3	-0.723301	2.91292e-06	Coefficient_of_variation_of_C12-1_A
CCV104_A1B	PC1	-0.720057	3.38639e-06	Coefficient_of_variation_of_C104_A1B
DCV186_C	PC1	-0.717304	3.84184e-06	Coefficient_of_variation_of_D186_C
C11-2_C	PC2	-0.713662	4.52978e-06	Bud_cell_size
CCV103_C	PC1	-0.713486	4.56562e-06	Coefficient_of_variation_of_C103_C
CCV12-1_C	PC1	-0.705878	6.38814e-06	Coefficient_of_variation_of_C12-1_C
CCV112_C	PC1	-0.704922	6.65862e-06	Coefficient_of_variation_of_C112_C
CCV110_C	PC1	-0.702308	7.45217e-06	Coefficient_of_variation_of_C110_C
C11-1_A	PC1	-0.700065	8.20052e-06	Whole_cell_size
ACV102_C	PC1	-0.698607	8.72243e-06	Coefficient_of_variation_of_A102_C
A9_C	PC2	-0.694034	1.05612e-05	Proportion_of_actin_region_at_neck
D186_C	PC1	-0.692845	1.10931e-05	Total_length_of_two_straight_segments_D12-1C4-1_and_D12-2C4-1
D158_C	PC2	-0.690164	1.23835e-05	Angle_between_D1-1D1-2_and_C1-1C1-2
C12-1_A	PC2	-0.687975	1.35361e-05	Whole_cell_outline_length
CCV11-1_C	PC1	-0.687007	1.40753e-05	Coefficient_of_variation_of_C11-1_C
D159_C	PC2	-0.6855	1.49549e-05	Angle_between_D2-1D2-2_and_C1-1C1-2
C115_A1B	PC1	-0.680128	1.85068e-05	Mother_axis_ratio
D185_C	PC1	-0.678953	1.93787e-05	Total_length_of_two_straight_segments_D11-1C4-1_and_D11-2C4-1
C102_C	PC2	-0.677909	2.01844e-05	Whole_cell_outline_length
CCV103_A	PC3	-0.676077	2.16711e-05	Coefficient_of_variation_of_C103_A
CCV101_A1B	PC1	-0.665441	3.24305e-05	Coefficient_of_variation_of_C101_A1B
D173_A	PC1	-0.664092	3.40929e-05	Maximal_distance_between_nuclear_gravity_center_and_nuclear_outline
C108_C	PC2	-0.663121	3.53362e-05	Short_axis_length_in_bud
CCV113_C	PC1	-0.662548	3.60885e-05	Coefficient_of_variation_of_C113_C
C12-1_A	PC1	-0.659871	3.98017e-05	Whole_cell_outline_length
A112_C	PC2	-0.657839	4.28448e-05	Actin_cd_ratio
C106_C	PC2	-0.657666	4.31123e-05	Bud_direction
C11-1_A	PC2	-0.652493	5.18745e-05	Whole_cell_size
CCV103_A	PC1	-0.652019	5.2752e-05	Coefficient_of_variation_of_C103_A
D177_C	PC2	-0.645956	6.52189e-05	Nuclear_long_axis_length_in_bud
D147_A1B	PC2	-0.642475	7.35135e-05	Relative_distance_of_nuclear_gravity_center_to_mother_center
D216	PC3	0.64321	7.16866e-05	nuclear_C_ratio_to_nuclear_A1BC_cells
C116_A1B	PC4	0.647722	6.13402e-05	Axis_ratio_ratio
D216	PC2	0.648592	5.9507e-05	nuclear_C_ratio_to_nuclear_A1BC_cells
D209	PC3	0.652248	5.23264e-05	nuclear_C_ratio_to_budded_cells
A109	PC2	0.653675	4.97434e-05	actin_e_ratio
C13_A1B	PC1	0.670076	2.72592e-05	Mother_cell_fitness_for_ellipse
A119	PC3	0.674941	2.26425e-05	actin_f_ratio_to_budded_cells
C114_A1B	PC1	0.700305	8.11705e-06	Bud_axis_ratio
D146_C	PC3	0.709351	5.48715e-06	Distance_between_nuclear_outline_point_D8_in_bud_and_bud_tip
C125	PC3	0.755776	5.69575e-07	large_bud_ratio_to_buded_cells
D213	PC3	0.762023	4.04251e-07	nuclear_C_ratio_to_nuclear_AA1BC_cells
D202	PC3	0.766626	3.1193e-07	nuclear_C_ratio
A118	PC2	0.767231	3.01351e-07	actin_e_ratio_to_budded_cells
C114_C	PC1	0.782539	1.2143e-07	Bud_axis_ratio
A110	PC3	0.803109	3.17331e-08	actin_f_ratio
C122	PC3	0.834369	2.96533e-09	large_bud_ratio
A111	PC2	0.846638	1.01943e-09	actin_ae_ratio
NA	PC53	NA	NA	NA
1IDs of morphological parameters (Ohya et al., 2005) inclduing actin, cell wall and nucleus parameters.
2Descriptions of the morphological parameters (Ohya et al., 2005 ).
3PC5 sapce dose not have any signficant parameter after Bonferroni correction.

## Sheet: Table S6
Table S6. Significant parameters of each mannoprotein mutant (Wald test, FDR=0.05).
Mutant	Cluster1	No of significant parameter(s)	Parameter ID2	Z value	P value	Description3
ccw12	I	81	CCV128_A1B	16.0105	4.10938e-34	Coefficient_of_variation_of_C128_A1B
			CCV103_A1B	15.6352	3.76334e-33	Coefficient_of_variation_of_C103_A1B
			CCV112_A1B	15.3902	1.60984e-32	Coefficient_of_variation_of_C112_A1B
			CCV12-1_A1B	14.8078	5.20663e-31	Coefficient_of_variation_of_C12-1_A1B
			C114_A1B	-14.093	3.85252e-29	Bud_axis_ratio
			C115_A	13.6732	4.9044e-28	Whole_cell_axis_ratio
			C115_A1B	12.8629	6.83544e-26	Mother_axis_ratio
			C109_A1B	12.3781	1.32536e-24	Neck_width
			C115_C	11.7946	4.71975e-23	Mother_axis_ratio
			C114_C	-11.2284	1.50735e-21	Bud_axis_ratio
			CCV103_A	10.22	6.95591e-19	Coefficient_of_variation_of_C103_A
			DCV118_A1B	10.0244	2.26609e-18	Coefficient_of_variation_of_D118_A1B
			CCV12-2_C	9.43523	7.74148e-17	Coefficient_of_variation_of_C12-2_C
			C106_A1B	-9.4311	7.93442e-17	Bud_direction
			CCV11-2_C	9.30812	1.64844e-16	Coefficient_of_variation_of_C11-2_C
			CCV104_A1B	9.14564	4.3158e-16	Coefficient_of_variation_of_C104_A1B
			D132_A1B	8.99473	1.05106e-15	Distance_between_nuclear_brightest_point_and_middle_point_of_neck
			C117_C	-8.66644	7.18311e-15	Cell_outline_ratio
			C104_C	8.65318	7.7597e-15	Short_axis_length_in_mother
			D110_A1B	8.61962	9.43247e-15	Distance_between_nuclear_gravity_center_and_middle_point_of_neck
			C109_C	8.55205	1.39634e-14	Neck_width
			CCV11-1_A1B	8.36649	4.08023e-14	Coefficient_of_variation_of_C11-1_A1B
			CCV101_C	8.35046	4.47467e-14	Coefficient_of_variation_of_C101_C
			CCV102_C	8.32114	5.29657e-14	Coefficient_of_variation_of_C102_C
			D152_A1B	8.20646	1.02232e-13	Mobility_of_nucleus_in_mother
			C125_C	-8.03866	2.66046e-13	Large_bud_ratio
			C104_A1B	7.97792	3.75445e-13	Short_axis_length_in_mother
			C118_C	-7.8727	6.80236e-13	Cell_size_ratio
			C124_C	7.86832	6.9725e-13	Medium_bud_ratio
			C13_A	-7.79106	1.07659e-12	Whole_cell_fitness_for_ellipse
			CCV103_C	7.768	1.22529e-12	Coefficient_of_variation_of_C103_C
			C116_A1B	-7.70085	1.78412e-12	Axis_ratio_ratio
			CCV12-1_A	7.67364	2.07679e-12	Coefficient_of_variation_of_C12-1_A
			DCV185_C	7.50773	5.21902e-12	Coefficient_of_variation_of_D185_C
			C11-1_C	7.49586	5.57316e-12	Mother_cell_size
			C126_A	-7.29722	1.65988e-11	Brightness_difference_of_cell_wall
			C106_C	-7.21893	2.54313e-11	Bud_direction
			CCV113_C	7.21825	2.55254e-11	Coefficient_of_variation_of_C113_C
			CCV108_C	7.15462	3.60508e-11	Coefficient_of_variation_of_C108_C
			D143_A1B	7.09797	4.89666e-11	Distance_between_nuclear_outline_point_D6-1_and_middle_point_of_neck
			CCV12-1_C	7.08533	5.24193e-11	Coefficient_of_variation_of_C12-1_C
			CCV128_C	7.08341	5.29656e-11	Coefficient_of_variation_of_C128_C
			D162_C	-7.05557	6.15334e-11	Angle_between_D1-1D1-2_and_C1C4-1
			C128_C	7.0186	7.50564e-11	Distance_between_middle_point_of_neck_and_mother_hip
			DCV126_A1B	6.98894	8.79951e-11	Coefficient_of_variation_of_D126_A1B
			C11-1_A1B	6.76105	2.95491e-10	Mother_cell_size
			C112_C	6.68203	4.47681e-10	Distance_between_middle_point_of_neck_and_mother_center
			DCV186_C	6.62288	6.1001e-10	Coefficient_of_variation_of_D186_C
			CCV11-1_C	6.59329	7.11749e-10	Coefficient_of_variation_of_C11-1_C
			DCV131_C	6.55089	8.87274e-10	Coefficient_of_variation_of_D131_C
			CCV101_A1B	6.4971	1.17234e-09	Coefficient_of_variation_of_C101_A1B
			CCV110_A1B	6.46194	1.40563e-09	Coefficient_of_variation_of_C110_A1B
			CCV11-1_A	6.45638	1.44651e-09	Coefficient_of_variation_of_C11-1_A
			D143_C	6.4413	1.56324e-09	Distance_between_nuclear_outline_point_D6-1_in_mother_and_middle_point_of_neck
			C12-1_C	6.15072	6.8483e-09	Mother_cell_outline_length
			D151_C	-6.04019	1.18958e-08	Ratio_of_distance_between_each_nucleus_and_middle_point_of_neck
			C128_A1B	6.00357	1.42667e-08	Distance_between_middle_point_of_neck_and_mother_hip
			C103_C	5.92141	2.13987e-08	Long_axis_length_in_mother
			C104_A	5.90683	2.29878e-08	Short_axis_length_in_whole_cell
			A9_C	-5.87109	2.73867e-08	Proportion_of_actin_region_at_neck
			DCV181_A1B	5.85404	2.97676e-08	Coefficient_of_variation_of_D181_A1B
			CCV112_C	5.78586	4.14808e-08	Coefficient_of_variation_of_C112_C
			D158_C	-5.77386	4.39662e-08	Angle_between_D1-1D1-2_and_C1-1C1-2
			D163_C	-5.75565	4.80177e-08	Angle_between_D2-1D2-2_and_C1C4-1
			D159_C	-5.74365	5.08851e-08	Angle_between_D2-1D2-2_and_C1-1C1-2
			DCV14-1_C	5.71826	5.75133e-08	Coefficient_of_variation_of_D14-1_C
			C112_A1B	5.59386	1.04318e-07	Distance_between_middle_point_of_neck_and_mother_center
			C101_A1B	5.57855	1.12191e-07	Whole_cell_size
			DCV172_A1B	5.54052	1.3434e-07	Coefficient_of_variation_of_D172_A1B
			C13_A1B	-5.48131	1.77581e-07	Mother_cell_fitness_for_ellipse
			D147_A1B	-5.36567	3.04656e-07	Relative_distance_of_nuclear_gravity_center_to_mother_center
			C12-1_A1B	5.34486	3.35478e-07	Mother_cell_outline_length
			A122_A1B	5.33645	3.48771e-07	Number_of_bright_actin_patches
			CCV104_C	5.31877	3.78447e-07	Coefficient_of_variation_of_C104_C
			DCV127_A	5.21131	6.19245e-07	Coefficient_of_variation_of_D127_A
			DCV104_A1B	5.19587	6.64315e-07	Coefficient_of_variation_of_D104_A1B
			D107_A1B	-5.14135	8.50431e-07	Ratio_of_D104_to_C103
			CCV110_C	5.13577	8.7211e-07	Coefficient_of_variation_of_C110_C
			ACV102_C	5.13477	8.76051e-07	Coefficient_of_variation_of_A102_C
			A8-1_C	5.11481	9.58505e-07	Total_brightness_of_actin_region_in_mother
			D108_C	5.11034	9.77957e-07	Distance_between_nuclear_gravity_center_in_mother_and_middle_point_of_neck
ccw14	II	0	NA	NA	NA	NA
flo11		0	NA	NA	NA	NA
srl1		3	C12-1_C	5.43724	2.18317e-07	Mother_cell_outline_length
			C103_C	5.34465	3.35795e-07	Long_axis_length_in_mother
			C11-1_C	5.17809	7.20167e-07	Mother_cell_size
tir3		1	C114_A1B	5.14913	8.21062e-07	Bud_axis_ratio
cis3	III	0	NA	NA	NA	NA
fig2		2	C114_A1B	5.27439	4.64146e-07	Bud_axis_ratio
			C116_A1B	5.2099	6.23235e-07	Axis_ratio_ratio
fit1		0	NA	NA	NA	NA
fit2		0	NA	NA	NA	NA
flo1		0	NA	NA	NA	NA
flo10		0	NA	NA	NA	NA
pst1		0	NA	NA	NA	NA
spi1		0	NA	NA	NA	NA
tip1		0	NA	NA	NA	NA
cwp1	IV	0	NA	NA	NA	NA
cwp2		0	NA	NA	NA	NA
dan1		0	NA	NA	NA	NA
fit3		0	NA	NA	NA	NA
hsp150		1	CCV115_A	-5.97944	1.60759e-08	Coefficient_of_variation_of_C115_A
pir1		1	C116_C	-5.41398	2.43367e-07	Axis_ratio_ratio
pir3		0	NA	NA	NA	NA
sed1		0	NA	NA	NA	NA
sps2		1	A119	5.37672	2.87122e-07	actin_f_ratio_to_budded_cells
sps22		0	NA	NA	NA	NA
tir1		0	NA	NA	NA	NA
tir2		0	NA	NA	NA	NA
tir4		0	NA	NA	NA	NA
dse2	V	15	C122	7.20721	2.71045e-11	large_bud_ratio
			A109	6.90003	1.41484e-10	actin_e_ratio
			C126_A	-6.85323	1.81444e-10	Brightness_difference_of_cell_wall
			C125	6.78695	2.57733e-10	large_bud_ratio_to_buded_cells
			D202	6.76335	2.91926e-10	nuclear_C_ratio
			D213	6.706	3.94773e-10	nuclear_C_ratio_to_nuclear_AA1BC_cells
			A106	-6.15562	6.68205e-09	actin_b_ratio
			CCV115_A1B	5.67052	7.23453e-08	Coefficient_of_variation_of_C115_A1B
			D209	5.57276	1.15319e-07	nuclear_C_ratio_to_budded_cells
			D216	5.52811	1.42452e-07	nuclear_C_ratio_to_nuclear_A1BC_cells
			C115_A	5.38953	2.72703e-07	Whole_cell_axis_ratio
			CCV104_A	-5.34937	3.28548e-07	Coefficient_of_variation_of_C104_A
			A110	5.25299	5.11963e-07	actin_f_ratio
			C125_A1B	5.18516	6.92534e-07	Large_bud_ratio
			A118	5.14637	8.31361e-07	actin_e_ratio_to_budded_cells
egt2		31	C126_A	-12.043	1.03116e-23	Brightness_difference_of_cell_wall
			C126_A1B	-10.0149	2.39983e-18	Brightness_difference_of_cell_wall
			C115_A	9.16504	3.84812e-16	Whole_cell_axis_ratio
			CCV12-1_A	-9.05897	7.1991e-16	Coefficient_of_variation_of_C12-1_A
			CCV11-1_A	-8.47152	2.22585e-14	Coefficient_of_variation_of_C11-1_A
			CCV103_A	-8.14684	1.43722e-13	Coefficient_of_variation_of_C103_A
			C106_C	-8.06269	2.3209e-13	Bud_direction
			C126_C	-7.90235	5.75515e-13	Brightness_difference_of_cell_wall
			C106_A1B	-7.85478	7.52511e-13	Bud_direction
			CCV104_A	-7.84296	8.04278e-13	Coefficient_of_variation_of_C104_A
			C125	7.71853	1.61629e-12	large_bud_ratio_to_buded_cells
			DCV102_A	-7.65339	2.32513e-12	Coefficient_of_variation_of_D102_A
			D202	7.1459	3.77936e-11	nuclear_C_ratio
			D209	7.13778	3.94901e-11	nuclear_C_ratio_to_budded_cells
			D216	7.11385	4.49445e-11	nuclear_C_ratio_to_nuclear_A1BC_cells
			D213	7.10732	4.65567e-11	nuclear_C_ratio_to_nuclear_AA1BC_cells
			C122	7.09369	5.01106e-11	large_bud_ratio
			A119	6.8857	1.49921e-10	actin_f_ratio_to_budded_cells
			A109	6.76947	2.82646e-10	actin_e_ratio
			A110	6.62101	6.16003e-10	actin_f_ratio
			C115_A1B	6.51155	1.08793e-09	Mother_axis_ratio
			D214	-6.26338	3.87914e-09	nuclear_A1_ratio_to_nuclear_A1BC_cells
			D207	-6.21449	4.96772e-09	nuclear_A1_ratio_to_budded_cells
			A108_C	-6.12249	7.79244e-09	Actin_d_iso_ratio
			A112_C	-5.95389	1.80311e-08	Actin_cd_ratio
			D158_C	-5.90951	2.26871e-08	Angle_between_D1-1D1-2_and_C1-1C1-2
			D146_C	5.8067	3.74888e-08	Distance_between_nuclear_outline_point_D8_in_bud_and_bud_tip
			A118	5.6808	6.88644e-08	actin_e_ratio_to_budded_cells
			D159_C	-5.63228	8.68694e-08	Angle_between_D2-1D2-2_and_C1-1C1-2
			C116_C	5.62448	9.01618e-08	Axis_ratio_ratio
			DCV127_A	-5.60079	1.00939e-07	Coefficient_of_variation_of_D127_A
sun4		10	C115_A	6.70844	3.89737e-10	Whole_cell_axis_ratio
			A109	6.49626	1.17746e-09	actin_e_ratio
			C115_A1B	5.92714	2.08037e-08	Mother_axis_ratio
			A108_C	-5.62757	8.80167e-08	Actin_d_iso_ratio
			A112_C	-5.58562	1.07503e-07	Actin_cd_ratio
			A118	5.41099	2.46776e-07	actin_e_ratio_to_budded_cells
			C106_C	-5.37913	2.86213e-07	Bud_direction
			C106_A1B	-5.19922	6.54273e-07	Bud_direction
			D202	5.19272	6.73884e-07	nuclear_C_ratio
			D213	5.10671	9.94054e-07	nuclear_C_ratio_to_nuclear_AA1BC_cells
ecm33	VI	22	C116_C	8.52377	1.64512e-14	Axis_ratio_ratio
			C106_A1B	-7.30707	1.57288e-11	Bud_direction
			C116_A1B	7.19643	2.87386e-11	Axis_ratio_ratio
			C115_C	6.8404	1.94229e-10	Mother_axis_ratio
			C106_C	-6.72915	3.49543e-10	Bud_direction
			C115_A1B	6.58763	7.33061e-10	Mother_axis_ratio
			C112_C	6.40315	1.90172e-09	Distance_between_middle_point_of_neck_and_mother_center
			C125_C	-6.3388	2.64319e-09	Large_bud_ratio
			C126_A	-6.32701	2.80711e-09	Brightness_difference_of_cell_wall
			C124_C	6.32476	2.83946e-09	Medium_bud_ratio
			C111_C	6.26847	3.78032e-09	Distance_between_bud_tip_and_mother_short_axis_extension
			C105_C	-6.19626	5.44636e-09	Neck_position
			C118_C	-6.15977	6.54423e-09	Cell_size_ratio
			C117_C	-5.91786	2.17757e-08	Cell_outline_ratio
			C105_A1B	-5.76474	4.59503e-08	Neck_position
			C111_A1B	5.67331	7.13824e-08	Distance_between_bud_tip_and_mother_short_axis_extension
			ACV101_A	5.40005	2.59675e-07	Coefficient_of_variation_of_A101_A
			CCV113_C	5.32127	3.74097e-07	Coefficient_of_variation_of_C113_C
			A117	-5.28136	4.46173e-07	actin_d_iso_ratio_to_budded_cells
			DCV176_A	5.22537	5.80811e-07	Coefficient_of_variation_of_D176_A
			CCV104_A1B	5.16788	7.54263e-07	Coefficient_of_variation_of_C104_A1B
			A9_C	-5.16566	7.61898e-07	Proportion_of_actin_region_at_neck
sag1	VII	28	C12-2_C	-7.14212	3.85736e-11	Bud_cell_outline_length
			C11-2_C	-6.85853	1.76409e-10	Bud_cell_size
			C104_A	-6.84343	1.91129e-10	Short_axis_length_in_whole_cell
			C108_C	-6.70789	3.90873e-10	Short_axis_length_in_bud
			C12-1_A	-6.48259	1.2636e-09	Whole_cell_outline_length
			C11-1_A	-6.39884	1.94431e-09	Whole_cell_size
			C107_C	-6.30257	3.17909e-09	Long_axis_length_in_bud
			D132_A1B	-6.2293	4.60967e-09	Distance_between_nuclear_brightest_point_and_middle_point_of_neck
			ACV7-1_A1B	6.15455	6.71818e-09	Coefficient_of_variation_of_A7-1_A1B
			C102_C	-6.08305	9.60927e-09	Whole_cell_outline_length
			C103_A	-5.87217	2.72433e-08	Long_axis_length_in_whole_cell
			D174_C	-5.87086	2.74184e-08	Maximal_distance_between_nuclear_gravity_center_and_nuclear_outline_in_bud
			C113_C	-5.78302	4.2056e-08	Distance_between_bud_tip_and_mother_long_axis_through_middle_point_of_neck
			D177_C	-5.76925	4.49576e-08	Nuclear_long_axis_length_in_bud
			C101_C	-5.73854	5.21547e-08	Whole_cell_size
			D169_A1B	-5.72471	5.57522e-08	Angle_between_C4-1D1-1_and_C4-1C1
			D102_A	-5.67785	6.9845e-08	Distance_between_nuclear_gravity_center_and_mother_tip
			A111	5.62898	8.8247e-08	actin_ae_ratio
			D109_C	-5.60741	9.78051e-08	Distance_between_nuclear_gravity_center_in_bud_and_middle_point_of_neck
			D110_A1B	-5.46694	1.89973e-07	Distance_between_nuclear_gravity_center_and_middle_point_of_neck
			D179_A	-5.44232	2.13196e-07	Nuclear_minimum_radius
			D186_C	-5.41397	2.43376e-07	Total_length_of_two_straight_segments_D12-1C4-1_and_D12-2C4-1
			D185_C	-5.36147	3.1065e-07	Total_length_of_two_straight_segments_D11-1C4-1_and_D11-2C4-1
			A112	-5.35282	3.23344e-07	actin_bcd_ratio
			D14-1_A	-5.34032	3.42591e-07	Nuclear_size
			D127_A	-5.2914	4.29268e-07	Distance_between_nuclear_brightest_point_and_cell_tip
			D173_A	-5.18446	6.99644e-07	Maximal_distance_between_nuclear_gravity_center_and_nuclear_outline
			C128_A1B	-5.10553	9.99356e-07	Distance_between_middle_point_of_neck_and_mother_hip
1Gaussian mixture model clustering (Figure 1).
2IDs of morphological parameters (Ohya et al., 2005) inclduing actin, cell wall and nucleus parameters.
3Descriptions of the morphological parameters (Ohya et al., 2005 ).

## Sheet: Table S7
Table S7. Pearson correlation coefficient (r)1 between Dse2-GFP and other proteins.
Rank	Protein	r	P value
1	Cts1-GFP	0.98	1.6e-14
2	GFP-Egt2	0.23	0.31
3	GFP-Fks1	-0.34	0.13
4	Chs3-GFP	-0.52	0.016
5	Myo1-GFP	-0.54	0.012
1Pearson correlation coefficient (r) between mean values of protein accumulation kinetics from selected time points (-10 to +30 min).

## Sheet: Table S8
Table S8. Duplicated and non-duplicated genes of mannoproteins considering their functional responsibility and diversification.
	Mannoprotein genes			Homologue mannoprotein gene(s)
	Gene name	Cluster1	# of significant parameters2	Gene name	Cluster1	# of significant parameters2
Duplicated genes	CCW12	I	81	FLO10	III	0
	TIR3	II	1	TIP1	III	0
				TIR2	IV	0
				TIR4	IV	0
	CIS3	III	0	HSP150	IV	1
				PIR1	IV	1
				PIR3	IV	0
	FIT1	III	0	FIT3	IV	0
	SED1	IV	0	SPI1	III	0
	SPS2	IV	1	SPS22	IV	0
	ECM33	VI	22	PST1	III	0
Non-duplicated genes	CCW14	II	0	-	-	-
	FIT2	III	0	-	-	-
	CWP1	IV	0	-	-	-
	CWP2	IV	0	-	-	-
	TIR1	IV	0	-	-	-
	DSE2	V	15	-	-	-
	EGT2	V	31	-	-	-
	SAG1	VII	28	-	-	-
1Gaussian mixture model clustering (Figure 1).
2Wald-test at FDR = 0.05 (Table S4).

## Sheet: Table S9
Table S9. Protein-Protein interactions of 32 mannoproteins. Data obtained from Oughtred et al. (2019).
Interactor A	Interactor B	BioGRID interaction ID	Synonyms interactor A	Synonyms interactor B	Experimental system	Author	Pubmed ID	Throughput	Modification	Qualifications
YLR110C (Ccw12)	YLR350W (Orm2)	274216	-	-	PCA	Tarassov K (2008)	18467557	High Throughput	-	-
YLR110C (Ccw12)	YMR149W (Swp1)	274217	-	L000002255	PCA	Tarassov K (2008)	18467557	High Throughput	-	-
YLR110C (Ccw12)	YDL229W (Ssb1)	694574	-	YG101|Hsp70 family ATPase SSB1|L000002073|L000002508	Affinity Capture-MS	Babu M (2012)	22940862	High Throughput	-	Purification data downloaded from http://wodaklab.org/membrane_web/downloads/Purifications.zip, filtered for LCMS/MS confidence > 90% and MALDI-TOF Z-score > 1.
YLR110C (Ccw12)	YAL005C (Ssa1)	694575	-	YG100|Hsp70 family ATPase SSA1|L000002069	Affinity Capture-MS	Babu M (2012)	22940862	High Throughput	-	Purification data downloaded from http://wodaklab.org/membrane_web/downloads/Purifications.zip, filtered for LCMS/MS confidence > 90% and MALDI-TOF Z-score > 1.
YGL122C (Nab2)	YLR110C (Ccw12)	346114	mRNA-binding protein NAB2|L000001227	-	Affinity Capture-RNA	Batisse J (2009)	19840948	High Throughput|Low Throughput	-	High Throughput: The experiment involved high-throughput sequencing of the RNAs that co-precipitated with TAP-tagged Nab2 (Nab2-TAP).|Low Throughput: The experiment involved using RT-PCR to detect transcripts present in the Nab2-TAP containing gradient fractions but not in the Rix1-TAP eluate.
YLR430W (Sen1)	YLR110C (Ccw12)	572692	CIK3|NRD2|putative DNA/RNA helicase SEN1|L000001862	-	Affinity Capture-RNA	Creamer TJ (2011)	22028667	High Throughput	-	interaction detected by PAR-CLIP
YOR151C (Rpb2)	YLR110C (Ccw12)	572715	RPB150|RPO22|SIT2|SOH2|DNA-directed RNA polymerase II core subunit RPB2|B150|L000001588|L000001676	-	Affinity Capture-RNA	Creamer TJ (2011)	22028667	High Throughput	-	interaction detected by PAR-CLIP
YDL160C (Dhh1)	YLR110C (Ccw12)	812165	DExD/H-box ATP-dependent RNA helicase DHH1|L000000504	-	Affinity Capture-RNA	Mitchell SF (2012)	23222640	High Throughput	-	UV cross-linking followed by immunoprecipitation
YJL124C (Lsm1)	YLR110C (Ccw12)	812397	SPB8|L000004427	-	Affinity Capture-RNA	Mitchell SF (2012)	23222640	High Throughput	-	UV cross-linking followed by immunoprecipitation
YCR077C (Pat1)	YLR110C (Ccw12)	812696	MRT1|L000001183|L000003214	-	Affinity Capture-RNA	Mitchell SF (2012)	23222640	High Throughput	-	UV cross-linking followed by immunoprecipitation
YHL034C (Sbp1)	YLR110C (Ccw12)	813489	SSB1|SSBR1|L000002628|L000002076	-	Affinity Capture-RNA	Mitchell SF (2012)	23222640	High Throughput	-	UV cross-linking followed by immunoprecipitation
YOR153W (Pdr5)	YLR110C (Ccw12)	891420	LEM1|STS1|YDR1|ATP-binding cassette multidrug transporter PDR5|L000001365|L000002136|L000002504	-	PCA	Snider J (2013)	23831759	High Throughput	-	MYTH
YNL209W (Ssb2)	YLR110C (Ccw12)	1061790	YG103|Hsp70 family ATPase SSB2|L000002715	-	Co-purification	Willmund F (2013)	23332755	High Throughput	-	isolation of cotranslationally bound SSB-RNC complexes allows us to identify the chaperone-bound nascent polypeptides through analysis of the mRNAs encoding the substrates
YPR042C (Puf2)	YLR110C (Ccw12)	1535275	-	-	Affinity Capture-RNA	Porter DF (2015)	26668354	High Throughput	-	HITS-CLIP
YLL013C (Puf3)	YLR110C (Ccw12)	2395001	mRNA-binding protein PUF3	-	Affinity Capture-RNA	Lapointe CP (2015)	26524240	High Throughput	-	RNA Tagging
YOR198C (Bfr1)	YLR110C (Ccw12)	2396002	L000000174	-	Affinity Capture-RNA	Lapointe CP (2015)	26524240	High Throughput	-	RNA Tagging
YOR254C (Sec63)	YLR110C (Ccw12)	2450851	PTL1|protein-transporting protein SEC63|L000001854|L000001269	-	Two-hybrid	Rizzolo K (2018)	29659649	High Throughput	-	MYTH
YLR390W-A (Ccw14)	YGR282C (Bgl2)	694655	SSR1|YLR391W|YLR391W-A|ICWP|L000004428	SCW9|L000000175|S000029440|L000004570	Affinity Capture-MS	Babu M (2012)	22940862	High Throughput	-	Purification data downloaded from http://wodaklab.org/membrane_web/downloads/Purifications.zip, filtered for LCMS/MS confidence > 90% and MALDI-TOF Z-score > 1.
YBL032W (Hek2)	YLR390W-A (Ccw14)	320588	KHD1	SSR1|YLR391W|YLR391W-A|ICWP|L000004428	Affinity Capture-RNA	Hasegawa Y (2008)	18805955	High Throughput	-	-
YGL200C (Emp24)	YLR390W-A (Ccw14)	556487	BST2|L000000549	SSR1|YLR391W|YLR391W-A|ICWP|L000004428	Affinity Capture-Western	Castillon GA (2011)	21680708	Low Throughput	-	-
YDL160C (Dhh1)	YLR390W-A (Ccw14)	812185	DExD/H-box ATP-dependent RNA helicase DHH1|L000000504	SSR1|YLR391W|YLR391W-A|ICWP|L000004428	Affinity Capture-RNA	Mitchell SF (2012)	23222640	High Throughput	-	UV cross-linking followed by immunoprecipitation
YLL013C (Puf3)	YLR390W-A (Ccw14)	871326	mRNA-binding protein PUF3	SSR1|YLR391W|YLR391W-A|ICWP|L000004428	Affinity Capture-RNA	Freeberg MA (2013)	23409723	High Throughput	-	Puf3 protein bound to RNA subdomain: 3'UTR
YJL080C (Scp160)	YLR390W-A (Ccw14)	1104759	L000001817	SSR1|YLR391W|YLR391W-A|ICWP|L000004428	Affinity Capture-RNA	Hirschmann WD (2014)	24445806	Low Throughput	-	-
YPR042C (Puf2)	YLR390W-A (Ccw14)	1535557	-	SSR1|YLR391W|YLR391W-A|ICWP|L000004428	Affinity Capture-RNA	Porter DF (2015)	26668354	High Throughput	-	HITS-CLIP
YOR198C (Bfr1)	YLR390W-A (Ccw14)	2396448	L000000174	SSR1|YLR391W|YLR391W-A|ICWP|L000004428	Affinity Capture-RNA	Lapointe CP (2015)	26524240	High Throughput	-	RNA Tagging
YOR254C (Sec63)	YLR390W-A (Ccw14)	2450852	PTL1|protein-transporting protein SEC63|L000001854|L000001269	SSR1|YLR391W|YLR391W-A|ICWP|L000004428	Two-hybrid	Rizzolo K (2018)	29659649	High Throughput	-	MYTH
YKL130C (She2)	YJL158C (Cis3)	265305	L000004571	CCW11|CCW5|PIR4|SCW8|S000029072|L000003951|L000004553|S000029439|L000004569	Affinity Capture-RNA	Oeffinger M (2007)	17922018	High Throughput	-	-
YBL032W (Hek2)	YJL158C (Cis3)	320799	KHD1	CCW11|CCW5|PIR4|SCW8|S000029072|L000003951|L000004553|S000029439|L000004569	Affinity Capture-RNA	Hasegawa Y (2008)	18805955	High Throughput	-	-
YDR515W (Slf1)	YJL158C (Cis3)	637858	SRO99|L000004191|L000002894	CCW11|CCW5|PIR4|SCW8|S000029072|L000003951|L000004553|S000029439|L000004569	Affinity Capture-RNA	Schenk L (2012)	22271760	High Throughput	-	RNA-binding protein immunopurification-microarray (RIP-chip) analysis, cut-off score: >0.6
YKL163W (Pir3)	YJL158C (Cis3)	693526	CCW8|L000001443	CCW11|CCW5|PIR4|SCW8|S000029072|L000003951|L000004553|S000029439|L000004569	Affinity Capture-Western	Babu M (2012)	22940862	Low Throughput	-	-
YDL160C (Dhh1)	YJL158C (Cis3)	812130	DExD/H-box ATP-dependent RNA helicase DHH1|L000000504	CCW11|CCW5|PIR4|SCW8|S000029072|L000003951|L000004553|S000029439|L000004569	Affinity Capture-RNA	Mitchell SF (2012)	23222640	High Throughput	-	UV cross-linking followed by immunoprecipitation
YCR077C (Pat1)	YJL158C (Cis3)	812659	MRT1|L000001183|L000003214	CCW11|CCW5|PIR4|SCW8|S000029072|L000003951|L000004553|S000029439|L000004569	Affinity Capture-RNA	Mitchell SF (2012)	23222640	High Throughput	-	UV cross-linking followed by immunoprecipitation
YHL034C (Sbp1)	YJL158C (Cis3)	813362	SSB1|SSBR1|L000002628|L000002076	CCW11|CCW5|PIR4|SCW8|S000029072|L000003951|L000004553|S000029439|L000004569	Affinity Capture-RNA	Mitchell SF (2012)	23222640	High Throughput	-	UV cross-linking followed by immunoprecipitation
YLL013C (Puf3)	YJL158C (Cis3)	871169	mRNA-binding protein PUF3	CCW11|CCW5|PIR4|SCW8|S000029072|L000003951|L000004553|S000029439|L000004569	Affinity Capture-RNA	Freeberg MA (2013)	23409723	High Throughput	-	Puf3 protein bound to RNA subdomain: 3'UTR
YNL209W (Ssb2)	YJL158C (Cis3)	1061722	YG103|Hsp70 family ATPase SSB2|L000002715	CCW11|CCW5|PIR4|SCW8|S000029072|L000003951|L000004553|S000029439|L000004569	Co-purification	Willmund F (2013)	23332755	High Throughput	-	isolation of cotranslationally bound SSB-RNC complexes allows us to identify the chaperone-bound nascent polypeptides through analysis of the mRNAs encoding the substrates
YPR042C (Puf2)	YJL158C (Cis3)	1535449	-	CCW11|CCW5|PIR4|SCW8|S000029072|L000003951|L000004553|S000029439|L000004569	Affinity Capture-RNA	Porter DF (2015)	26668354	High Throughput	-	HITS-CLIP
YOR198C (Bfr1)	YJL158C (Cis3)	2395907	L000000174	CCW11|CCW5|PIR4|SCW8|S000029072|L000003951|L000004553|S000029439|L000004569	Affinity Capture-RNA	Lapointe CP (2015)	26524240	High Throughput	-	RNA Tagging
YOR254C (Sec63)	YJL158C (Cis3)	2450884	PTL1|protein-transporting protein SEC63|L000001854|L000001269	CCW11|CCW5|PIR4|SCW8|S000029072|L000003951|L000004553|S000029439|L000004569	Two-hybrid	Rizzolo K (2018)	29659649	High Throughput	-	MYTH
YGL014W (Puf4)	YJL158C (Cis3)	2452497	YGL023	CCW11|CCW5|PIR4|SCW8|S000029072|L000003951|L000004553|S000029439|L000004569	Affinity Capture-RNA	Lapointe CP (2017)	28768715	High Throughput	-	-
YGL178W (Mpt5)	YJL158C (Cis3)	2453135	HTR1|PUF5|UTH4|L000001146	CCW11|CCW5|PIR4|SCW8|S000029072|L000003951|L000004553|S000029439|L000004569	Affinity Capture-RNA	Lapointe CP (2017)	28768715	High Throughput	-	-
YJR074W (Mog1)	YJL158C (Cis3)	2535245	L000004615	CCW11|CCW5|PIR4|SCW8|S000029072|L000003951|L000004553|S000029439|L000004569	Affinity Capture-MS	Oliete-Calvo P (2018)	30249596	High Throughput	-	-
YPL020C (Ulp1)	YKL096W (Cwp1)	825098	NIB1|SUMO protease ULP1|S000029323|L000001249	YJU1|L000000446|L000002512	PCA	Sung MK (2013)	23403034	High Throughput	-	bimolecular fluorescence complementation (BiFC) assay; hit protein contains VC-tagged Smt3p; signal intensity of cells overexpressing bait protein is compared to that of control cells without overexpression to detect desumoylation substrates of bait protein
YIL031W (Ulp2)	YKL096W (Cwp1)	825189	SMT4|L000001939	YJU1|L000000446|L000002512	PCA	Sung MK (2013)	23403034	High Throughput	-	bimolecular fluorescence complementation (BiFC) assay; hit protein contains VC-tagged Smt3p; signal intensity of cells overexpressing bait protein is compared to that of control cells without overexpression to detect desumoylation substrates of bait protein
YNL209W (Ssb2)	YKL096W (Cwp1)	1061783	YG103|Hsp70 family ATPase SSB2|L000002715	YJU1|L000000446|L000002512	Co-purification	Willmund F (2013)	23332755	High Throughput	-	isolation of cotranslationally bound SSB-RNC complexes allows us to identify the chaperone-bound nascent polypeptides through analysis of the mRNAs encoding the substrates
YDL160C (Dhh1)	YKL096W (Cwp1)	2350042	DExD/H-box ATP-dependent RNA helicase DHH1|L000000504	YJU1|L000000446|L000002512	Affinity Capture-RNA	Miller JE (2017)	29158339	High Throughput	-	-
YOR198C (Bfr1)	YKL096W (Cwp1)	2395509	L000000174	YJU1|L000000446|L000002512	Affinity Capture-RNA	Lapointe CP (2015)	26524240	High Throughput	-	RNA Tagging
YOR359W (Vts1)	YKL096W (Cwp1)	2426209	-	YJU1|L000000446|L000002512	Affinity Capture-RNA	She R (2017)	28325876	High Throughput	-	PAR-CLIP
YGL178W (Mpt5)	YKL096W (Cwp1)	2453769	HTR1|PUF5|UTH4|L000001146	YJU1|L000000446|L000002512	Affinity Capture-RNA	Lapointe CP (2017)	28768715	High Throughput	-	-
YKL096W-A (Cwp2)	YKL028W (Tfa1)	184166	LPR1|YKL097W-A|L000000952|L000002857	L000002595	Affinity Capture-MS	Krogan NJ (2006)	16554755	High Throughput	-	-
YKL096W-A (Cwp2)	YML086C (Alo1)	274109	LPR1|YKL097W-A|L000000952|L000002857	D-arabinono-1,4-lactone oxidase|L000004264	PCA	Tarassov K (2008)	18467557	High Throughput	-	-
YJL057C (Iks1)	YKL096W-A (Cwp2)	198542	protein kinase IKS1|L000004209	LPR1|YKL097W-A|L000000952|L000002857	Biochemical Activity	Ptacek J (2005)	16319894	High Throughput	Phosphorylation	32P incorporation on protein chip
YGL122C (Nab2)	YKL096W-A (Cwp2)	350881	mRNA-binding protein NAB2|L000001227	LPR1|YKL097W-A|L000000952|L000002857	Affinity Capture-RNA	Batisse J (2009)	19840948	High Throughput	-	High Throughput: The experiment involved high-throughput sequencing of the RNAs that co-precipitated with TAP-tagged Nab2 (Nab2-TAP).
YGL200C (Emp24)	YKL096W-A (Cwp2)	556488	BST2|L000000549	LPR1|YKL097W-A|L000000952|L000002857	Affinity Capture-Western	Castillon GA (2011)	21680708	Low Throughput	-	-
YCR077C (Pat1)	YKL096W-A (Cwp2)	812676	MRT1|L000001183|L000003214	LPR1|YKL097W-A|L000000952|L000002857	Affinity Capture-RNA	Mitchell SF (2012)	23222640	High Throughput	-	UV cross-linking followed by immunoprecipitation
YHL034C (Sbp1)	YKL096W-A (Cwp2)	813419	SSB1|SSBR1|L000002628|L000002076	LPR1|YKL097W-A|L000000952|L000002857	Affinity Capture-RNA	Mitchell SF (2012)	23222640	High Throughput	-	UV cross-linking followed by immunoprecipitation
YDR510W (Smt3)	YKL096W-A (Cwp2)	824936	SUMO family protein SMT3|L000001938	LPR1|YKL097W-A|L000000952|L000002857	Affinity Capture-Western	Sung MK (2013)	23403034	Low Throughput	-	#LPPI|Likely protein-protein interaction|Western blot indicated the protein migrates normally and thus interacts non-covalently with SUMO
YKR039W (Gap1)	YKL096W-A (Cwp2)	855460	amino acid permease GAP1|L000000667	LPR1|YKL097W-A|L000000952|L000002857	Two-hybrid	Van Zeebroeck G (2011)	21912684	Low Throughput	-	-
YNL209W (Ssb2)	YKL096W-A (Cwp2)	1061784	YG103|Hsp70 family ATPase SSB2|L000002715	LPR1|YKL097W-A|L000000952|L000002857	Co-purification	Willmund F (2013)	23332755	High Throughput	-	isolation of cotranslationally bound SSB-RNC complexes allows us to identify the chaperone-bound nascent polypeptides through analysis of the mRNAs encoding the substrates
YPR042C (Puf2)	YKL096W-A (Cwp2)	1535334	-	LPR1|YKL097W-A|L000000952|L000002857	Affinity Capture-RNA	Porter DF (2015)	26668354	High Throughput	-	HITS-CLIP|PAR-CLIP
YER118C (Sho1)	YKL096W-A (Cwp2)	2388209	SSU81|osmosensor SHO1|L000002632|L000002823	LPR1|YKL097W-A|L000000952|L000002857	Two-hybrid	Lam MH (2015)	25644660	Low Throughput	-	MYTH
YDL160C (Dhh1)	YKL096W-A (Cwp2)	2390231	DExD/H-box ATP-dependent RNA helicase DHH1|L000000504	LPR1|YKL097W-A|L000000952|L000002857	Affinity Capture-RNA	Jungfleisch J (2017)	27821408	High Throughput	-	CRAC
YOR198C (Bfr1)	YKL096W-A (Cwp2)	2395568	L000000174	LPR1|YKL097W-A|L000000952|L000002857	Affinity Capture-RNA	Lapointe CP (2015)	26524240	High Throughput	-	RNA Tagging
YOR254C (Sec63)	YKL096W-A (Cwp2)	2450854	PTL1|protein-transporting protein SEC63|L000001854|L000001269	LPR1|YKL097W-A|L000000952|L000002857	Two-hybrid	Rizzolo K (2018)	29659649	High Throughput	-	MYTH
YOR359W (Vts1)	YJR150C (Dan1)	2426202	-	CCW13|L000003381	Affinity Capture-RNA	She R (2017)	28325876	High Throughput	-	PAR-CLIP
YBL032W (Hek2)	YHR143W (Dse2)	320545	KHD1	-	Affinity Capture-RNA	Hasegawa Y (2008)	18805955	High Throughput	-	-
YNL197C (Whi3)	YHR143W (Dse2)	332407	mRNA-binding protein WHI3|L000002486	-	Protein-RNA	Colomina N (2008)	18667435	High Throughput	-	-
YER118C (Sho1)	YHR143W (Dse2)	345627	SSU81|osmosensor SHO1|L000002632|L000002823	-	Two-hybrid	Tonikian R (2009)	19841731	High Throughput	-	-
YDL160C (Dhh1)	YHR143W (Dse2)	812109	DExD/H-box ATP-dependent RNA helicase DHH1|L000000504	-	Affinity Capture-RNA	Mitchell SF (2012)	23222640	High Throughput	-	UV cross-linking followed by immunoprecipitation
YJL124C (Lsm1)	YHR143W (Dse2)	812355	SPB8|L000004427	-	Affinity Capture-RNA	Mitchell SF (2012)	23222640	High Throughput	-	UV cross-linking followed by immunoprecipitation
YHL034C (Sbp1)	YHR143W (Dse2)	813286	SSB1|SSBR1|L000002628|L000002076	-	Affinity Capture-RNA	Mitchell SF (2012)	23222640	High Throughput	-	UV cross-linking followed by immunoprecipitation
YLL013C (Puf3)	YHR143W (Dse2)	871099	mRNA-binding protein PUF3	-	Affinity Capture-RNA	Freeberg MA (2013)	23409723	High Throughput	-	Puf3 protein bound to RNA subdomain: 3'UTR
YNL209W (Ssb2)	YHR143W (Dse2)	1061774	YG103|Hsp70 family ATPase SSB2|L000002715	-	Co-purification	Willmund F (2013)	23332755	High Throughput	-	isolation of cotranslationally bound SSB-RNC complexes allows us to identify the chaperone-bound nascent polypeptides through analysis of the mRNAs encoding the substrates
YPR042C (Puf2)	YHR143W (Dse2)	1535370	-	-	Affinity Capture-RNA	Porter DF (2015)	26668354	High Throughput	-	HITS-CLIP|PAR-CLIP
YBR245C (Isw1)	YHR143W (Dse2)	2336965	SGN2|chromatin-remodeling ATPase ISW1|L000004447	-	Affinity Capture-RNA	Babour A (2016)	27863241	High Throughput	-	in npl3 mutant background
YGL178W (Mpt5)	YHR143W (Dse2)	2348146	HTR1|PUF5|UTH4|L000001146	-	Affinity Capture-RNA	Miller JE (2017)	29158339	High Throughput	-	-
YAL021C (Ccr4)	YHR143W (Dse2)	2353472	FUN27|NUT21|CCR4-NOT core exoribonuclease subunit CCR4|L000000239	-	Affinity Capture-RNA	Miller JE (2017)	29158339	High Throughput	-	-
YOR198C (Bfr1)	YHR143W (Dse2)	2395446	L000000174	-	Affinity Capture-RNA	Lapointe CP (2015)	26524240	High Throughput	-	RNA Tagging
YOL133W (Hrt1)	YBR078W (Ecm33)	102311	HRT2|RBX1|ROC1|SCF ubiquitin ligase complex subunit HRT1|L000004443	L000003902	Affinity Capture-MS	Ho Y (2002)	11805837	High Throughput	-	-
YJR066W (Tor1)	YBR078W (Ecm33)	256557	DRR1|phosphatidylinositol kinase-related protein kinase TOR1|L000002322	L000003902	Co-fractionation	Aronova S (2007)	17507646	High Throughput	-	-
YKL203C (Tor2)	YBR078W (Ecm33)	256591	DRR2|phosphatidylinositol kinase-related protein kinase TOR2|L000002323	L000003902	Co-fractionation	Aronova S (2007)	17507646	High Throughput	-	-
YBL032W (Hek2)	YBR078W (Ecm33)	321322	KHD1	L000003902	Affinity Capture-RNA	Hasegawa Y (2008)	18805955	High Throughput	-	-
YDL160C (Dhh1)	YBR078W (Ecm33)	811994	DExD/H-box ATP-dependent RNA helicase DHH1|L000000504	L000003902	Affinity Capture-RNA	Mitchell SF (2012)	23222640	High Throughput	-	UV cross-linking followed by immunoprecipitation
YCR077C (Pat1)	YBR078W (Ecm33)	812487	MRT1|L000001183|L000003214	L000003902	Affinity Capture-RNA	Mitchell SF (2012)	23222640	High Throughput	-	UV cross-linking followed by immunoprecipitation
YHL034C (Sbp1)	YBR078W (Ecm33)	812876	SSB1|SSBR1|L000002628|L000002076	L000003902	Affinity Capture-RNA	Mitchell SF (2012)	23222640	High Throughput	-	UV cross-linking followed by immunoprecipitation
YLL013C (Puf3)	YBR078W (Ecm33)	870715	mRNA-binding protein PUF3	L000003902	Affinity Capture-RNA	Freeberg MA (2013)	23409723	High Throughput	-	Puf3 protein bound to RNA subdomain: 3'UTR
YGR281W (Yor1)	YBR078W (Ecm33)	891570	YRS1|ATP-binding cassette transporter YOR1|L000003083	L000003902	PCA	Snider J (2013)	23831759	High Throughput	-	MYTH
YDL156W (Cmr1)	YBR078W (Ecm33)	1108845	-	L000003902	Affinity Capture-MS	Gallina I (2015)	25817432	High Throughput	-	Supplementary Data 1
YLR320W (Mms22)	YBR078W (Ecm33)	1516093	SLM2	L000003902	Affinity Capture-MS	Buser R (2016)	26849847	High Throughput	-	Table S2
YPR042C (Puf2)	YBR078W (Ecm33)	1535283	-	L000003902	Affinity Capture-RNA	Porter DF (2015)	26668354	High Throughput	-	HITS-CLIP|PAR-CLIP
YLL026W (Hsp104)	YBR078W (Ecm33)	1537031	chaperone ATPase HSP104|L000000823	L000003902	Affinity Capture-MS	Hill SM (2016)	27373154	High Throughput	-	-
YDR457W (Tom1)	YBR078W (Ecm33)	2198508	E3 ubiquitin-protein ligase TOM1|L000002983	L000003902	Affinity Capture-MS	Sung MK (2016)	27552055	High Throughput	-	-
YGL119W (Coq8)	YBR078W (Ecm33)	2335650	ABC1|protein kinase COQ8|L000000010	L000003902	Affinity Capture-MS	Guo X (2017)	28539364	High Throughput	-	-
YNL026W (Sam50)	YBR078W (Ecm33)	2387179	OMP85|TOB55|SAM complex subunit SAM50	L000003902	Affinity Capture-MS	Qiu J (2013)	23911324	High Throughput	-	-
YOR198C (Bfr1)	YBR078W (Ecm33)	2395257	L000000174	L000003902	Affinity Capture-RNA	Lapointe CP (2015)	26524240	High Throughput	-	RNA Tagging
YOR359W (Vts1)	YBR078W (Ecm33)	2426066	-	L000003902	Affinity Capture-RNA	She R (2017)	28325876	High Throughput	-	PAR-CLIP
YGL178W (Mpt5)	YBR078W (Ecm33)	2453471	HTR1|PUF5|UTH4|L000001146	L000003902	Affinity Capture-RNA	Lapointe CP (2017)	28768715	High Throughput	-	-
YOR001W (Rrp6)	YBR078W (Ecm33)	2455237	exosome nuclease subunit RRP6|L000003540	L000003902	Affinity Capture-MS	Gonzales-Zubiate FA (2017)	28539363	High Throughput	-	-
YJL109C (Utp10)	YBR078W (Ecm33)	2514753	-	L000003902	Affinity Capture-MS	Sturm M (2017)	29263326	Low Throughput	-	-
YOR197W (Mca1)	YBR078W (Ecm33)	2527944	YCA1|Ca(2+)-dependent cysteine protease MCA1	L000003902	Affinity Capture-MS	Shrestha A (2019)	30675380	High Throughput	-	-
YJR074W (Mog1)	YBR078W (Ecm33)	2535169	L000004615	L000003902	Affinity Capture-MS	Oliete-Calvo P (2018)	30249596	High Throughput	-	-
YJL092W (Srs2)	YNL327W (Egt2)	150067	HPR5|DNA helicase SRS2|RADH1|RADH|L000000809|L000001578	L000004074	Two-hybrid	Chiolo I (2005)	15964827	Low Throughput	-	-
YLR452C (Sst2)	YNL327W (Egt2)	184798	GTPase-activating protein SST2|L000002093	L000004074	Affinity Capture-MS	Krogan NJ (2006)	16554755	High Throughput	-	-
YBL032W (Hek2)	YNL327W (Egt2)	320585	KHD1	L000004074	Affinity Capture-RNA	Hasegawa Y (2008)	18805955	High Throughput	-	-
YGL122C (Nab2)	YNL327W (Egt2)	350437	mRNA-binding protein NAB2|L000001227	L000004074	Affinity Capture-RNA	Batisse J (2009)	19840948	High Throughput	-	High Throughput: The experiment involved high-throughput sequencing of the RNAs that co-precipitated with TAP-tagged Nab2 (Nab2-TAP).
YCL037C (Sro9)	YNL327W (Egt2)	638767	L000003106	L000004074	Affinity Capture-RNA	Schenk L (2012)	22271760	High Throughput	-	RNA-binding protein immunopurification-microarray (RIP-chip) analysis, cut-off score: >0.6
YHL034C (Sbp1)	YNL327W (Egt2)	813681	SSB1|SSBR1|L000002628|L000002076	L000004074	Affinity Capture-RNA	Mitchell SF (2012)	23222640	High Throughput	-	UV cross-linking followed by immunoprecipitation
YNL197C (Whi3)	YNL327W (Egt2)	927165	mRNA-binding protein WHI3|L000002486	L000004074	Affinity Capture-RNA	Holmes KJ (2014)	24386330	Low Throughput	-	mRNAs were high confidence interactors with Whi3p if their false discovery rate was less than 1% in two datasets and they contained a Whi3-interacting motif
YPR042C (Puf2)	YNL327W (Egt2)	1535553	-	L000004074	Affinity Capture-RNA	Porter DF (2015)	26668354	High Throughput	-	HITS-CLIP|PAR-CLIP
YBR245C (Isw1)	YNL327W (Egt2)	2337438	SGN2|chromatin-remodeling ATPase ISW1|L000004447	L000004074	Affinity Capture-RNA	Babour A (2016)	27863241	High Throughput	-	in npl3 mutant background
YAL021C (Ccr4)	YNL327W (Egt2)	2352097	FUN27|NUT21|CCR4-NOT core exoribonuclease subunit CCR4|L000000239	L000004074	Affinity Capture-RNA	Miller JE (2017)	29158339	High Throughput	-	-
YDL160C (Dhh1)	YNL327W (Egt2)	2390742	DExD/H-box ATP-dependent RNA helicase DHH1|L000000504	L000004074	Affinity Capture-RNA	Jungfleisch J (2017)	27821408	High Throughput	-	CRAC
YOR198C (Bfr1)	YNL327W (Egt2)	2396239	L000000174	L000004074	Affinity Capture-RNA	Lapointe CP (2015)	26524240	High Throughput	-	RNA Tagging
YGL178W (Mpt5)	YNL327W (Egt2)	2453114	HTR1|PUF5|UTH4|L000001146	L000004074	Affinity Capture-RNA	Lapointe CP (2017)	28768715	High Throughput	-	-
YCR089W (Fig2)	YNR044W (Aga1)	351741	L000003312	L000000061	Affinity Capture-Western	Huang G (2009)	19299340	Low Throughput	-	-
YGR084C (Mrp13)	YCR089W (Fig2)	182977	mitochondrial 37S ribosomal protein YmS-A|L000001142|L000001157	L000003312	Affinity Capture-MS	Krogan NJ (2006)	16554755	High Throughput	-	-
YBL032W (Hek2)	YCR089W (Fig2)	321126	KHD1	L000003312	Affinity Capture-RNA	Hasegawa Y (2008)	18805955	High Throughput	-	-
YNL197C (Whi3)	YCR089W (Fig2)	332239	mRNA-binding protein WHI3|L000002486	L000003312	Protein-RNA	Colomina N (2008)	18667435	High Throughput	-	-
YGL122C (Nab2)	YCR089W (Fig2)	348013	mRNA-binding protein NAB2|L000001227	L000003312	Affinity Capture-RNA	Batisse J (2009)	19840948	High Throughput	-	High Throughput: The experiment involved high-throughput sequencing of the RNAs that co-precipitated with TAP-tagged Nab2 (Nab2-TAP).
YPR042C (Puf2)	YCR089W (Fig2)	1536237	-	L000003312	Affinity Capture-RNA	Porter DF (2015)	26668354	High Throughput	-	HITS-CLIP
YBL032W (Hek2)	YDR534C (Fit1)	321374	KHD1	-	Affinity Capture-RNA	Hasegawa Y (2008)	18805955	High Throughput	-	-
YBR245C (Isw1)	YDR534C (Fit1)	2336713	SGN2|chromatin-remodeling ATPase ISW1|L000004447	-	Affinity Capture-RNA	Babour A (2016)	27863241	High Throughput	-	in npl3 mutant background
YDL160C (Dhh1)	YDR534C (Fit1)	2389736	DExD/H-box ATP-dependent RNA helicase DHH1|L000000504	-	Affinity Capture-RNA	Jungfleisch J (2017)	27821408	High Throughput	-	CRAC
YOR359W (Vts1)	YDR534C (Fit1)	2426118	-	-	Affinity Capture-RNA	She R (2017)	28325876	High Throughput	-	PAR-CLIP
YGL178W (Mpt5)	YDR534C (Fit1)	2453668	HTR1|PUF5|UTH4|L000001146	-	Affinity Capture-RNA	Lapointe CP (2017)	28768715	High Throughput	-	-
YBL032W (Hek2)	YOR382W (Fit2)	320590	KHD1	-	Affinity Capture-RNA	Hasegawa Y (2008)	18805955	High Throughput	-	-
YCL037C (Sro9)	YOR382W (Fit2)	638849	L000003106	-	Affinity Capture-RNA	Schenk L (2012)	22271760	High Throughput	-	RNA-binding protein immunopurification-microarray (RIP-chip) analysis, cut-off score: >0.6
YLL013C (Puf3)	YOR382W (Fit2)	871578	mRNA-binding protein PUF3	-	Affinity Capture-RNA	Freeberg MA (2013)	23409723	High Throughput	-	Puf3 protein bound to RNA subdomain: 3'UTR
YNL209W (Ssb2)	YOR382W (Fit2)	1061821	YG103|Hsp70 family ATPase SSB2|L000002715	-	Co-purification	Willmund F (2013)	23332755	High Throughput	-	isolation of cotranslationally bound SSB-RNC complexes allows us to identify the chaperone-bound nascent polypeptides through analysis of the mRNAs encoding the substrates
YAL021C (Ccr4)	YOR382W (Fit2)	2354392	FUN27|NUT21|CCR4-NOT core exoribonuclease subunit CCR4|L000000239	-	Affinity Capture-RNA	Miller JE (2017)	29158339	High Throughput	-	-
YDL160C (Dhh1)	YOR382W (Fit2)	2390512	DExD/H-box ATP-dependent RNA helicase DHH1|L000000504	-	Affinity Capture-RNA	Jungfleisch J (2017)	27821408	High Throughput	-	CRAC
YBL032W (Hek2)	YOR383C (Fit3)	321101	KHD1	-	Affinity Capture-RNA	Hasegawa Y (2008)	18805955	High Throughput	-	-
YNL209W (Ssb2)	YOR383C (Fit3)	1061822	YG103|Hsp70 family ATPase SSB2|L000002715	-	Co-purification	Willmund F (2013)	23332755	High Throughput	-	isolation of cotranslationally bound SSB-RNC complexes allows us to identify the chaperone-bound nascent polypeptides through analysis of the mRNAs encoding the substrates
YPR042C (Puf2)	YOR383C (Fit3)	1535879	-	-	Affinity Capture-RNA	Porter DF (2015)	26668354	High Throughput	-	HITS-CLIP|PAR-CLIP
YBR245C (Isw1)	YOR383C (Fit3)	2337663	SGN2|chromatin-remodeling ATPase ISW1|L000004447	-	Affinity Capture-RNA	Babour A (2016)	27863241	High Throughput	-	in npl3 mutant background
YAL021C (Ccr4)	YOR383C (Fit3)	2354433	FUN27|NUT21|CCR4-NOT core exoribonuclease subunit CCR4|L000000239	-	Affinity Capture-RNA	Miller JE (2017)	29158339	High Throughput	-	-
YDL160C (Dhh1)	YOR383C (Fit3)	2390513	DExD/H-box ATP-dependent RNA helicase DHH1|L000000504	-	Affinity Capture-RNA	Jungfleisch J (2017)	27821408	High Throughput	-	CRAC
YOR254C (Sec63)	YOR383C (Fit3)	2450855	PTL1|protein-transporting protein SEC63|L000001854|L000001269	-	Two-hybrid	Rizzolo K (2018)	29659649	High Throughput	-	MYTH
YBL032W (Hek2)	YAR050W (Flo1)	321011	KHD1	FLO2|FLO4|flocculin FLO1|L000000617|L000000616	Affinity Capture-RNA	Hasegawa Y (2008)	18805955	High Throughput	-	-
YGL122C (Nab2)	YAR050W (Flo1)	347687	mRNA-binding protein NAB2|L000001227	FLO2|FLO4|flocculin FLO1|L000000617|L000000616	Affinity Capture-RNA	Batisse J (2009)	19840948	High Throughput	-	High Throughput: The experiment involved high-throughput sequencing of the RNAs that co-precipitated with TAP-tagged Nab2 (Nab2-TAP).
YMR080C (Nam7)	YAR050W (Flo1)	856953	IFS2|MOF4|SUP113|UPF1|ATP-dependent RNA helicase NAM7|L000002429|S000029550|L000002232	FLO2|FLO4|flocculin FLO1|L000000617|L000000616	Affinity Capture-RNA	Johansson MJ (2007)	18087042	High Throughput	-	Transcript signal intensity, between the Upf1p-TAP and mock samples, showed a relative change of at least 2-fold. This change was reproducible in at least three of four replicate experiments and demonstrated a statistically significant P value.
YBR245C (Isw1)	YAR050W (Flo1)	2336107	SGN2|chromatin-remodeling ATPase ISW1|L000004447	FLO2|FLO4|flocculin FLO1|L000000617|L000000616	Affinity Capture-RNA	Babour A (2016)	27863241	High Throughput	-	in npl3 mutant background
YER118C (Sho1)	YAR050W (Flo1)	2388218	SSU81|osmosensor SHO1|L000002632|L000002823	FLO2|FLO4|flocculin FLO1|L000000617|L000000616	Two-hybrid	Lam MH (2015)	25644660	Low Throughput	-	MYTH
YBR245C (Isw1)	YKR102W (Flo10)	2336290	SGN2|chromatin-remodeling ATPase ISW1|L000004447	L000004081	Affinity Capture-RNA	Babour A (2016)	27863241	High Throughput	-	in npl3 mutant background
YMR284W (Yku70)	YIR019C (Flo11)	185228	HDF1|NES24|KU70|L000000759	MUC1|STA4|L000002104	Affinity Capture-MS	Krogan NJ (2006)	16554755	High Throughput	-	-
YBL032W (Hek2)	YIR019C (Flo11)	437386	KHD1	MUC1|STA4|L000002104	Affinity Capture-RNA	Wolf JJ (2010)	20382833	Low Throughput	-	-
YBR245C (Isw1)	YIR019C (Flo11)	2336257	SGN2|chromatin-remodeling ATPase ISW1|L000004447	MUC1|STA4|L000002104	Affinity Capture-RNA	Babour A (2016)	27863241	High Throughput	-	in npl3 mutant background
YOR359W (Vts1)	YIR019C (Flo11)	2426187	-	MUC1|STA4|L000002104	Affinity Capture-RNA	She R (2017)	28325876	High Throughput	-	PAR-CLIP
YJL159W (Hsp150)	YKL073W (Lhs1)	137103	CCW7|ORE1|PIR2|heat shock protein HSP150|L000000824|L000001442	CER1|SSI1|Hsp70 family chaperone LHS1|L000004102	Affinity Capture-Western	Saris N (1997)	9151684	Low Throughput	-	-
YJL159W (Hsp150)	YFL037W (Tub2)	186953	CCW7|ORE1|PIR2|heat shock protein HSP150|L000000824|L000001442	ARM10|SHE8|beta-tubulin|L000002388	Affinity Capture-MS	Krogan NJ (2006)	16554755	High Throughput	-	-
YJL159W (Hsp150)	YJL008C (Cct8)	186954	CCW7|ORE1|PIR2|heat shock protein HSP150|L000000824|L000001442	L000002764	Affinity Capture-MS	Krogan NJ (2006)	16554755	High Throughput	-	-
YJL159W (Hsp150)	YML085C (Tub1)	186955	CCW7|ORE1|PIR2|heat shock protein HSP150|L000000824|L000001442	alpha-tubulin TUB1|L000002387	Affinity Capture-MS	Krogan NJ (2006)	16554755	High Throughput	-	-
YBL032W (Hek2)	YJL159W (Hsp150)	321127	KHD1	CCW7|ORE1|PIR2|heat shock protein HSP150|L000000824|L000001442	Affinity Capture-RNA	Hasegawa Y (2008)	18805955	High Throughput	-	-
YGL122C (Nab2)	YJL159W (Hsp150)	347917	mRNA-binding protein NAB2|L000001227	CCW7|ORE1|PIR2|heat shock protein HSP150|L000000824|L000001442	Affinity Capture-RNA	Batisse J (2009)	19840948	High Throughput	-	High Throughput: The experiment involved high-throughput sequencing of the RNAs that co-precipitated with TAP-tagged Nab2 (Nab2-TAP).
YCR077C (Pat1)	YJL159W (Hsp150)	812660	MRT1|L000001183|L000003214	CCW7|ORE1|PIR2|heat shock protein HSP150|L000000824|L000001442	Affinity Capture-RNA	Mitchell SF (2012)	23222640	High Throughput	-	UV cross-linking followed by immunoprecipitation
YHL034C (Sbp1)	YJL159W (Hsp150)	813363	SSB1|SSBR1|L000002628|L000002076	CCW7|ORE1|PIR2|heat shock protein HSP150|L000000824|L000001442	Affinity Capture-RNA	Mitchell SF (2012)	23222640	High Throughput	-	UV cross-linking followed by immunoprecipitation
YLL013C (Puf3)	YJL159W (Hsp150)	871170	mRNA-binding protein PUF3	CCW7|ORE1|PIR2|heat shock protein HSP150|L000000824|L000001442	Affinity Capture-RNA	Freeberg MA (2013)	23409723	High Throughput	-	Puf3 protein bound to RNA subdomain: 3'UTR
YNL209W (Ssb2)	YJL159W (Hsp150)	1062617	YG103|Hsp70 family ATPase SSB2|L000002715	CCW7|ORE1|PIR2|heat shock protein HSP150|L000000824|L000001442	Co-purification	Willmund F (2013)	23332755	High Throughput	-	isolation of cotranslationally bound SSB-RNC complexes allows us to identify the chaperone-bound nascent polypeptides through analysis of the mRNAs encoding the substrates
YDR168W (Cdc37)	YJL159W (Hsp150)	1522178	SMO1|L000000273	CCW7|ORE1|PIR2|heat shock protein HSP150|L000000824|L000001442	Two-hybrid	Millson S (2014)	24452458	Low Throughput	-	Table 2
YPR042C (Puf2)	YJL159W (Hsp150)	1535287	-	CCW7|ORE1|PIR2|heat shock protein HSP150|L000000824|L000001442	Affinity Capture-RNA	Porter DF (2015)	26668354	High Throughput	-	HITS-CLIP|PAR-CLIP
YIL137C (Tma108)	YJL159W (Hsp150)	2203586	TAE3|RBF108	CCW7|ORE1|PIR2|heat shock protein HSP150|L000000824|L000001442	Affinity Capture-MS	Delaveau T (2016)	27580715	High Throughput	-	-
YOR091W (Tma46)	YJL159W (Hsp150)	2204166	RBF46	CCW7|ORE1|PIR2|heat shock protein HSP150|L000000824|L000001442	Affinity Capture-MS	Delaveau T (2016)	27580715	High Throughput	-	-
YAL021C (Ccr4)	YJL159W (Hsp150)	2352243	FUN27|NUT21|CCR4-NOT core exoribonuclease subunit CCR4|L000000239	CCW7|ORE1|PIR2|heat shock protein HSP150|L000000824|L000001442	Affinity Capture-RNA	Miller JE (2017)	29158339	High Throughput	-	-
YER118C (Sho1)	YJL159W (Hsp150)	2388196	SSU81|osmosensor SHO1|L000002632|L000002823	CCW7|ORE1|PIR2|heat shock protein HSP150|L000000824|L000001442	Affinity Capture-Western	Lam MH (2015)	25644660	Low Throughput	-	-
YDL160C (Dhh1)	YJL159W (Hsp150)	2390078	DExD/H-box ATP-dependent RNA helicase DHH1|L000000504	CCW7|ORE1|PIR2|heat shock protein HSP150|L000000824|L000001442	Affinity Capture-RNA	Jungfleisch J (2017)	27821408	High Throughput	-	CRAC
YOR198C (Bfr1)	YJL159W (Hsp150)	2395908	L000000174	CCW7|ORE1|PIR2|heat shock protein HSP150|L000000824|L000001442	Affinity Capture-RNA	Lapointe CP (2015)	26524240	High Throughput	-	RNA Tagging
YOR254C (Sec63)	YJL159W (Hsp150)	2450856	PTL1|protein-transporting protein SEC63|L000001854|L000001269	CCW7|ORE1|PIR2|heat shock protein HSP150|L000000824|L000001442	Two-hybrid	Rizzolo K (2018)	29659649	High Throughput	-	MYTH
YOR001W (Rrp6)	YJL159W (Hsp150)	2455286	exosome nuclease subunit RRP6|L000003540	CCW7|ORE1|PIR2|heat shock protein HSP150|L000000824|L000001442	Affinity Capture-MS	Gonzales-Zubiate FA (2017)	28539363	High Throughput	-	-
YJR074W (Mog1)	YJL159W (Hsp150)	2535244	L000004615	CCW7|ORE1|PIR2|heat shock protein HSP150|L000000824|L000001442	Affinity Capture-MS	Oliete-Calvo P (2018)	30249596	High Throughput	-	-
YKL164C (Pir1)	YDL069C (Cbs1)	184234	CCW6|L000001441	L000000230	Affinity Capture-MS	Krogan NJ (2006)	16554755	High Throughput	-	-
YKL114C (Apn1)	YKL164C (Pir1)	136363	DNA-(apurinic or apyrimidinic site) lyase APN1|L000000096	CCW6|L000001441	Affinity Capture-Western	Vongsamphanh R (2001)	11238901	Low Throughput	-	-
YBL032W (Hek2)	YKL164C (Pir1)	320750	KHD1	CCW6|L000001441	Affinity Capture-RNA	Hasegawa Y (2008)	18805955	High Throughput	-	-
YNL197C (Whi3)	YKL164C (Pir1)	332533	mRNA-binding protein WHI3|L000002486	CCW6|L000001441	Protein-RNA	Colomina N (2008)	18667435	High Throughput	-	-
YOL016C (Cmk2)	YKL164C (Pir1)	520329	calmodulin-dependent protein kinase CMK2|L000000367	CCW6|L000001441	Reconstituted Complex	Fasolo J (2011)	21460040	High Throughput	-	High Throughput: Proteome microarrays were used to identify proteins that interact with protein kinases.
YDL160C (Dhh1)	YKL164C (Pir1)	812148	DExD/H-box ATP-dependent RNA helicase DHH1|L000000504	CCW6|L000001441	Affinity Capture-RNA	Mitchell SF (2012)	23222640	High Throughput	-	UV cross-linking followed by immunoprecipitation
YJL124C (Lsm1)	YKL164C (Pir1)	812388	SPB8|L000004427	CCW6|L000001441	Affinity Capture-RNA	Mitchell SF (2012)	23222640	High Throughput	-	UV cross-linking followed by immunoprecipitation
YCR077C (Pat1)	YKL164C (Pir1)	812682	MRT1|L000001183|L000003214	CCW6|L000001441	Affinity Capture-RNA	Mitchell SF (2012)	23222640	High Throughput	-	UV cross-linking followed by immunoprecipitation
YHL034C (Sbp1)	YKL164C (Pir1)	813432	SSB1|SSBR1|L000002628|L000002076	CCW6|L000001441	Affinity Capture-RNA	Mitchell SF (2012)	23222640	High Throughput	-	UV cross-linking followed by immunoprecipitation
YLL013C (Puf3)	YKL164C (Pir1)	871222	mRNA-binding protein PUF3	CCW6|L000001441	Affinity Capture-RNA	Freeberg MA (2013)	23409723	High Throughput	-	Puf3 protein bound to RNA subdomain: 3'UTR
YNL209W (Ssb2)	YKL164C (Pir1)	1062627	YG103|Hsp70 family ATPase SSB2|L000002715	CCW6|L000001441	Co-purification	Willmund F (2013)	23332755	High Throughput	-	isolation of cotranslationally bound SSB-RNC complexes allows us to identify the chaperone-bound nascent polypeptides through analysis of the mRNAs encoding the substrates
YPR042C (Puf2)	YKL164C (Pir1)	1535291	-	CCW6|L000001441	Affinity Capture-RNA	Porter DF (2015)	26668354	High Throughput	-	HITS-CLIP|PAR-CLIP
YIL137C (Tma108)	YKL164C (Pir1)	2203686	TAE3|RBF108	CCW6|L000001441	Affinity Capture-MS	Delaveau T (2016)	27580715	High Throughput	-	-
YAL021C (Ccr4)	YKL164C (Pir1)	2352730	FUN27|NUT21|CCR4-NOT core exoribonuclease subunit CCR4|L000000239	CCW6|L000001441	Affinity Capture-RNA	Miller JE (2017)	29158339	High Throughput	-	-
YOR254C (Sec63)	YKL164C (Pir1)	2450858	PTL1|protein-transporting protein SEC63|L000001854|L000001269	CCW6|L000001441	Two-hybrid	Rizzolo K (2018)	29659649	High Throughput	-	MYTH
YGL014W (Puf4)	YKL164C (Pir1)	2452624	YGL023	CCW6|L000001441	Affinity Capture-RNA	Lapointe CP (2017)	28768715	High Throughput	-	-
YJR074W (Mog1)	YKL164C (Pir1)	2535275	L000004615	CCW6|L000001441	Affinity Capture-MS	Oliete-Calvo P (2018)	30249596	High Throughput	-	-
YBL032W (Hek2)	YKL163W (Pir3)	321264	KHD1	CCW8|L000001443	Affinity Capture-RNA	Hasegawa Y (2008)	18805955	High Throughput	-	-
YNL197C (Whi3)	YKL163W (Pir3)	332253	mRNA-binding protein WHI3|L000002486	CCW8|L000001443	Protein-RNA	Colomina N (2008)	18667435	High Throughput	-	-
YLL013C (Puf3)	YKL163W (Pir3)	871221	mRNA-binding protein PUF3	CCW8|L000001443	Affinity Capture-RNA	Freeberg MA (2013)	23409723	High Throughput	-	Puf3 protein bound to RNA subdomain: 3'UTR
YJR074W (Mog1)	YKL163W (Pir3)	2535276	L000004615	CCW8|L000001443	Affinity Capture-MS	Oliete-Calvo P (2018)	30249596	High Throughput	-	-
YDR055W (Pst1)	YAL005C (Ssa1)	693753	HPF2|L000004850	YG100|Hsp70 family ATPase SSA1|L000002069	Affinity Capture-MS	Babu M (2012)	22940862	High Throughput	-	Purification data downloaded from http://wodaklab.org/membrane_web/downloads/Purifications.zip, filtered for LCMS/MS confidence > 90% and MALDI-TOF Z-score > 1.
YDR055W (Pst1)	YDL229W (Ssb1)	693754	HPF2|L000004850	YG101|Hsp70 family ATPase SSB1|L000002073|L000002508	Affinity Capture-MS	Babu M (2012)	22940862	High Throughput	-	Purification data downloaded from http://wodaklab.org/membrane_web/downloads/Purifications.zip, filtered for LCMS/MS confidence > 90% and MALDI-TOF Z-score > 1.
YDR055W (Pst1)	YLL024C (Ssa2)	693755	HPF2|L000004850	YG102|Hsp70 family chaperone SSA2|L000002070	Affinity Capture-MS	Babu M (2012)	22940862	High Throughput	-	Purification data downloaded from http://wodaklab.org/membrane_web/downloads/Purifications.zip, filtered for LCMS/MS confidence > 90% and MALDI-TOF Z-score > 1.
YDL147W (Rpn5)	YDR055W (Pst1)	186615	NAS5|proteasome regulatory particle lid subunit RPN5|L000004451|L000004305	HPF2|L000004850	Affinity Capture-MS	Krogan NJ (2006)	16554755	High Throughput	-	-
YBL032W (Hek2)	YDR055W (Pst1)	321097	KHD1	HPF2|L000004850	Affinity Capture-RNA	Hasegawa Y (2008)	18805955	High Throughput	-	-
YGL122C (Nab2)	YDR055W (Pst1)	347314	mRNA-binding protein NAB2|L000001227	HPF2|L000004850	Affinity Capture-RNA	Batisse J (2009)	19840948	High Throughput	-	High Throughput: The experiment involved high-throughput sequencing of the RNAs that co-precipitated with TAP-tagged Nab2 (Nab2-TAP).
YLL013C (Puf3)	YDR055W (Pst1)	870826	mRNA-binding protein PUF3	HPF2|L000004850	Affinity Capture-RNA	Freeberg MA (2013)	23409723	High Throughput	-	Puf3 protein bound to RNA subdomain: CDS
YPR042C (Puf2)	YDR055W (Pst1)	1535870	-	HPF2|L000004850	Affinity Capture-RNA	Porter DF (2015)	26668354	High Throughput	-	HITS-CLIP
YAL021C (Ccr4)	YDR055W (Pst1)	2351697	FUN27|NUT21|CCR4-NOT core exoribonuclease subunit CCR4|L000000239	HPF2|L000004850	Affinity Capture-RNA	Miller JE (2017)	29158339	High Throughput	-	-
YDL160C (Dhh1)	YDR055W (Pst1)	2389575	DExD/H-box ATP-dependent RNA helicase DHH1|L000000504	HPF2|L000004850	Affinity Capture-RNA	Jungfleisch J (2017)	27821408	High Throughput	-	CRAC
YOR198C (Bfr1)	YDR055W (Pst1)	2395649	L000000174	HPF2|L000004850	Affinity Capture-RNA	Lapointe CP (2015)	26524240	High Throughput	-	RNA Tagging
YPL141C (Frk1)	YJR004C (Sag1)	186156	protein kinase FRK1	AG(ALPHA)1|L000001796	Affinity Capture-MS	Krogan NJ (2006)	16554755	High Throughput	-	-
YBL032W (Hek2)	YJR004C (Sag1)	321031	KHD1	AG(ALPHA)1|L000001796	Affinity Capture-RNA	Hasegawa Y (2008)	18805955	High Throughput	-	-
YNL197C (Whi3)	YJR004C (Sag1)	332398	mRNA-binding protein WHI3|L000002486	AG(ALPHA)1|L000001796	Protein-RNA	Colomina N (2008)	18667435	High Throughput	-	-
YOR198C (Bfr1)	YJR004C (Sag1)	2395929	L000000174	AG(ALPHA)1|L000001796	Affinity Capture-RNA	Lapointe CP (2015)	26524240	High Throughput	-	RNA Tagging
YDR077W (Sed1)	YDR044W (Hem13)	113707	L000001859	coproporphyrinogen oxidase|L000000765	Two-hybrid	Uetz P (2000)	10688190	High Throughput	-	-
YLR075W (Rpl10)	YDR077W (Sed1)	145457	GRC5|QSR1|ribosomal 60S subunit protein L10|L16|L10|L000000727	L000001859	Two-hybrid	Oender K (2003)	12627396	Low Throughput	-	-
YOR330C (Mip1)	YDR077W (Sed1)	147267	DNA-directed DNA polymerase gamma MIP1|L000001113	L000001859	Affinity Capture-Western	Phadnis N (2004)	15351639	Low Throughput	-	-
YEL065W (Sit1)	YDR077W (Sed1)	147949	ARN3	L000001859	Affinity Capture-Western	Park YS (2005)	15611868	Low Throughput	-	-
YBL032W (Hek2)	YDR077W (Sed1)	320804	KHD1	L000001859	Affinity Capture-RNA	Hasegawa Y (2008)	18805955	High Throughput	-	-
YDR143C (San1)	YDR077W (Sed1)	511710	ubiquitin-protein ligase SAN1|L000001800	L000001859	Two-hybrid	Rosenbaum JC (2011)	21211726	High Throughput	-	-
YJL124C (Lsm1)	YDR077W (Sed1)	812309	SPB8|L000004427	L000001859	Affinity Capture-RNA	Mitchell SF (2012)	23222640	High Throughput	-	UV cross-linking followed by immunoprecipitation
YCR077C (Pat1)	YDR077W (Sed1)	812535	MRT1|L000001183|L000003214	L000001859	Affinity Capture-RNA	Mitchell SF (2012)	23222640	High Throughput	-	UV cross-linking followed by immunoprecipitation
YHL034C (Sbp1)	YDR077W (Sed1)	813005	SSB1|SSBR1|L000002628|L000002076	L000001859	Affinity Capture-RNA	Mitchell SF (2012)	23222640	High Throughput	-	UV cross-linking followed by immunoprecipitation
YLL013C (Puf3)	YDR077W (Sed1)	870832	mRNA-binding protein PUF3	L000001859	Affinity Capture-RNA	Freeberg MA (2013)	23409723	High Throughput	-	Puf3 protein bound to RNA subdomain: 3'UTR|Puf3 protein bound to RNA subdomain: CDS
YPR042C (Puf2)	YDR077W (Sed1)	1535290	-	L000001859	Affinity Capture-RNA	Porter DF (2015)	26668354	High Throughput	-	HITS-CLIP|PAR-CLIP
YDL160C (Dhh1)	YDR077W (Sed1)	2349369	DExD/H-box ATP-dependent RNA helicase DHH1|L000000504	L000001859	Affinity Capture-RNA	Miller JE (2017)	29158339	High Throughput	-	-
YAL021C (Ccr4)	YDR077W (Sed1)	2351484	FUN27|NUT21|CCR4-NOT core exoribonuclease subunit CCR4|L000000239	L000001859	Affinity Capture-RNA	Miller JE (2017)	29158339	High Throughput	-	-
YER118C (Sho1)	YDR077W (Sed1)	2388200	SSU81|osmosensor SHO1|L000002632|L000002823	L000001859	Affinity Capture-Western	Lam MH (2015)	25644660	Low Throughput	-	-
YOR198C (Bfr1)	YDR077W (Sed1)	2395657	L000000174	L000001859	Affinity Capture-RNA	Lapointe CP (2015)	26524240	High Throughput	-	RNA Tagging
YOR254C (Sec63)	YDR077W (Sed1)	2450874	PTL1|protein-transporting protein SEC63|L000001854|L000001269	L000001859	Two-hybrid	Rizzolo K (2018)	29659649	High Throughput	-	MYTH
YER150W (Spi1)	YDL100C (Get3)	318863	L000004852	ARR4|guanine nucleotide exchange factor GET3	Two-hybrid	Yu H (2008)	18719252	High Throughput	-	-
YGL122C (Nab2)	YER150W (Spi1)	346748	mRNA-binding protein NAB2|L000001227	L000004852	Affinity Capture-RNA	Batisse J (2009)	19840948	High Throughput	-	High Throughput: The experiment involved high-throughput sequencing of the RNAs that co-precipitated with TAP-tagged Nab2 (Nab2-TAP).
YPL031C (Pho85)	YER150W (Spi1)	463960	LDB15|cyclin-dependent serine/threonine-protein kinase PHO85|phoU|L000001431	L000004852	Biochemical Activity	Ptacek J (2005)	16319894	High Throughput	Phosphorylation	32P incorporation on protein chip|complex with PCL9
YGL178W (Mpt5)	YER150W (Spi1)	2348995	HTR1|PUF5|UTH4|L000001146	L000004852	Affinity Capture-RNA	Miller JE (2017)	29158339	High Throughput	-	-
YAL021C (Ccr4)	YER150W (Spi1)	2354197	FUN27|NUT21|CCR4-NOT core exoribonuclease subunit CCR4|L000000239	L000004852	Affinity Capture-RNA	Miller JE (2017)	29158339	High Throughput	-	-
YDL160C (Dhh1)	YER150W (Spi1)	2391211	DExD/H-box ATP-dependent RNA helicase DHH1|L000000504	L000004852	Affinity Capture-RNA	Jungfleisch J (2017)	27821408	High Throughput	-	CRAC
YBL032W (Hek2)	YDR522C (Sps2)	321087	KHD1	L000002025	Affinity Capture-RNA	Hasegawa Y (2008)	18805955	High Throughput	-	-
YOR359W (Vts1)	YDR522C (Sps2)	2426116	-	L000002025	Affinity Capture-RNA	She R (2017)	28325876	High Throughput	-	PAR-CLIP
YPL240C (Hsp82)	YCL048W (Sps22)	149563	HSP90|Hsp90 family chaperone HSP82|L000000822	-	Two-hybrid	Zhao R (2005)	15766533	High Throughput	-	-
YNL255C (Gis2)	YCL048W (Sps22)	512532	L000004862	-	Affinity Capture-RNA	Scherrer T (2011)	21232131	High Throughput	-	-
YLR223C (Ifh1)	YOR247W (Srl1)	237600	L000001775	L000004669	Two-hybrid	Ito T (2001)	11283351	High Throughput	-	-
YKL130C (She2)	YOR247W (Srl1)	265276	L000004571	L000004669	Affinity Capture-RNA	Oeffinger M (2007)	17922018	High Throughput	-	-
YBL032W (Hek2)	YOR247W (Srl1)	320591	KHD1	L000004669	Affinity Capture-RNA	Hasegawa Y (2008)	18805955	High Throughput	-	-
YFR024C-A (Lsb3)	YOR247W (Srl1)	345368	YFR024C	L000004669	Two-hybrid	Tonikian R (2009)	19841731	High Throughput	-	-
YHR016C (Ysc84)	YOR247W (Srl1)	345429	LSB4|L000003175	L000004669	Two-hybrid	Tonikian R (2009)	19841731	High Throughput	-	-
YKL129C (Myo3)	YOR247W (Srl1)	345457	myosin 3|L000002889	L000004669	Two-hybrid	Tonikian R (2009)	19841731	High Throughput	-	-
YMR109W (Myo5)	YOR247W (Srl1)	345482	myosin 5|L000002935	L000004669	Two-hybrid	Tonikian R (2009)	19841731	High Throughput	-	-
YLR145W (Rmp1)	YOR247W (Srl1)	795555	-	L000004669	Affinity Capture-RNA	Aulds J (2012)	22977255	High Throughput	-	Rmp1 TAP-tagged allele KLS116 used; cells subject to cross-linking prior to immunoprecipitation of Rmp1p with RNA substrates
YLL013C (Puf3)	YOR247W (Srl1)	871563	mRNA-binding protein PUF3	L000004669	Affinity Capture-RNA	Freeberg MA (2013)	23409723	High Throughput	-	Puf3 protein bound to RNA subdomain: 5'UTR
YPR042C (Puf2)	YOR247W (Srl1)	1535512	-	L000004669	Affinity Capture-RNA	Porter DF (2015)	26668354	High Throughput	-	HITS-CLIP
YBR245C (Isw1)	YOR247W (Srl1)	2337629	SGN2|chromatin-remodeling ATPase ISW1|L000004447	L000004669	Affinity Capture-RNA	Babour A (2016)	27863241	High Throughput	-	in npl3 mutant background
YDL160C (Dhh1)	YOR247W (Srl1)	2390468	DExD/H-box ATP-dependent RNA helicase DHH1|L000000504	L000004669	Affinity Capture-RNA	Jungfleisch J (2017)	27821408	High Throughput	-	CRAC
YGL178W (Mpt5)	YOR247W (Srl1)	2453312	HTR1|PUF5|UTH4|L000001146	L000004669	Affinity Capture-RNA	Lapointe CP (2017)	28768715	High Throughput	-	-
YBR109C (Cmd1)	YNL066W (Sun4)	149034	calmodulin|CaM|L000000365	SCW3|putative glucosidase SUN4|L000004564|L000004151	Reconstituted Complex	Zhu H (2001)	11474067	Low Throughput	-	-
YNL307C (Mck1)	YNL066W (Sun4)	199199	CMS1|YPK1|serine/threonine/tyrosine protein kinase MCK1|L000001036|S000029094|L000000369	SCW3|putative glucosidase SUN4|L000004564|L000004151	Biochemical Activity	Ptacek J (2005)	16319894	High Throughput	Phosphorylation	32P incorporation on protein chip
YJL187C (Swe1)	YNL066W (Sun4)	200675	WEE1|tyrosine protein kinase SWE1|L000002248	SCW3|putative glucosidase SUN4|L000004564|L000004151	Biochemical Activity	Ptacek J (2005)	16319894	High Throughput	Phosphorylation	32P incorporation on protein chip
YGL179C (Tos3)	YNL066W (Sun4)	200771	serine/threonine protein kinase TOS3	SCW3|putative glucosidase SUN4|L000004564|L000004151	Biochemical Activity	Ptacek J (2005)	16319894	High Throughput	Phosphorylation	32P incorporation on protein chip
YNL154C (Yck2)	YNL066W (Sun4)	201565	serine/threonine protein kinase YCK2|L000002501	SCW3|putative glucosidase SUN4|L000004564|L000004151	Biochemical Activity	Ptacek J (2005)	16319894	High Throughput	Phosphorylation	32P incorporation on protein chip
YKL130C (She2)	YNL066W (Sun4)	265303	L000004571	SCW3|putative glucosidase SUN4|L000004564|L000004151	Affinity Capture-RNA	Oeffinger M (2007)	17922018	High Throughput	-	-
YBL032W (Hek2)	YNL066W (Sun4)	320572	KHD1	SCW3|putative glucosidase SUN4|L000004564|L000004151	Affinity Capture-RNA	Hasegawa Y (2008)	18805955	High Throughput	-	-
YPL204W (Hrr25)	YNL066W (Sun4)	520530	KTI14|serine/threonine protein kinase HRR25|L000000810	SCW3|putative glucosidase SUN4|L000004564|L000004151	Reconstituted Complex	Fasolo J (2011)	21460040	High Throughput	-	High Throughput: Proteome microarrays were used to identify proteins that interact with protein kinases.
YCL037C (Sro9)	YNL066W (Sun4)	638731	L000003106	SCW3|putative glucosidase SUN4|L000004564|L000004151	Affinity Capture-RNA	Schenk L (2012)	22271760	High Throughput	-	RNA-binding protein immunopurification-microarray (RIP-chip) analysis, cut-off score: >0.6
YCR077C (Pat1)	YNL066W (Sun4)	812754	MRT1|L000001183|L000003214	SCW3|putative glucosidase SUN4|L000004564|L000004151	Affinity Capture-RNA	Mitchell SF (2012)	23222640	High Throughput	-	UV cross-linking followed by immunoprecipitation
YDR293C (Ssd1)	YNL066W (Sun4)	927275	CLA1|MCS1|RLT1|SRK1|mRNA-binding translational repressor SSD1|L000002077	SCW3|putative glucosidase SUN4|L000004564|L000004151	Affinity Capture-RNA	Wanless AG (2014)	24465507	Low Throughput	-	-
YPR042C (Puf2)	YNL066W (Sun4)	1535403	-	SCW3|putative glucosidase SUN4|L000004564|L000004151	Affinity Capture-RNA	Porter DF (2015)	26668354	High Throughput	-	HITS-CLIP|PAR-CLIP
YBR245C (Isw1)	YNL066W (Sun4)	2337496	SGN2|chromatin-remodeling ATPase ISW1|L000004447	SCW3|putative glucosidase SUN4|L000004564|L000004151	Affinity Capture-RNA	Babour A (2016)	27863241	High Throughput	-	in npl3 mutant background
YDL160C (Dhh1)	YNL066W (Sun4)	2390826	DExD/H-box ATP-dependent RNA helicase DHH1|L000000504	SCW3|putative glucosidase SUN4|L000004564|L000004151	Affinity Capture-RNA	Jungfleisch J (2017)	27821408	High Throughput	-	CRAC
YOR198C (Bfr1)	YNL066W (Sun4)	2396188	L000000174	SCW3|putative glucosidase SUN4|L000004564|L000004151	Affinity Capture-RNA	Lapointe CP (2015)	26524240	High Throughput	-	RNA Tagging
YGL178W (Mpt5)	YNL066W (Sun4)	2453017	HTR1|PUF5|UTH4|L000001146	SCW3|putative glucosidase SUN4|L000004564|L000004151	Affinity Capture-RNA	Lapointe CP (2017)	28768715	High Throughput	-	-
YBR067C (Tip1)	YER151C (Ubp3)	180603	L000002311	BLM3|mRNA-binding ubiquitin-specific protease UBP3|L000002417|S000086717	Affinity Capture-MS	Krogan NJ (2006)	16554755	High Throughput	-	-
YLR145W (Rmp1)	YBR067C (Tip1)	795545	-	L000002311	Affinity Capture-RNA	Aulds J (2012)	22977255	High Throughput	-	Rmp1 TAP-tagged allele KLS116 used; cells subject to cross-linking prior to immunoprecipitation of Rmp1p with RNA substrates
YLL013C (Puf3)	YBR067C (Tip1)	870713	mRNA-binding protein PUF3	L000002311	Affinity Capture-RNA	Freeberg MA (2013)	23409723	High Throughput	-	Puf3 protein bound to RNA subdomain: 3'UTR
YNL209W (Ssb2)	YBR067C (Tip1)	1061746	YG103|Hsp70 family ATPase SSB2|L000002715	L000002311	Co-purification	Willmund F (2013)	23332755	High Throughput	-	isolation of cotranslationally bound SSB-RNC complexes allows us to identify the chaperone-bound nascent polypeptides through analysis of the mRNAs encoding the substrates
YPR042C (Puf2)	YBR067C (Tip1)	1535550	-	L000002311	Affinity Capture-RNA	Porter DF (2015)	26668354	High Throughput	-	HITS-CLIP
YAL021C (Ccr4)	YBR067C (Tip1)	2352233	FUN27|NUT21|CCR4-NOT core exoribonuclease subunit CCR4|L000000239	L000002311	Affinity Capture-RNA	Miller JE (2017)	29158339	High Throughput	-	-
YDL160C (Dhh1)	YBR067C (Tip1)	2389800	DExD/H-box ATP-dependent RNA helicase DHH1|L000000504	L000002311	Affinity Capture-RNA	Jungfleisch J (2017)	27821408	High Throughput	-	CRAC
YOR198C (Bfr1)	YBR067C (Tip1)	2395251	L000000174	L000002311	Affinity Capture-RNA	Lapointe CP (2015)	26524240	High Throughput	-	RNA Tagging
YOR359W (Vts1)	YBR067C (Tip1)	2426065	-	L000002311	Affinity Capture-RNA	She R (2017)	28325876	High Throughput	-	PAR-CLIP
YGL014W (Puf4)	YBR067C (Tip1)	2452891	YGL023	L000002311	Affinity Capture-RNA	Lapointe CP (2017)	28768715	High Throughput	-	-
YGL178W (Mpt5)	YBR067C (Tip1)	2453148	HTR1|PUF5|UTH4|L000001146	L000002311	Affinity Capture-RNA	Lapointe CP (2017)	28768715	High Throughput	-	-
YPL178W (Cbc2)	YER011W (Tir1)	149261	CBP20|MUD13|SAE1|L000002891|L000004111	SRP1|L000002059	Affinity Capture-MS	Rigaut G (1999)	10504710	Low Throughput	-	-
YDL132W (Cdc53)	YER011W (Tir1)	348629	cullin CDC53|L000000281	SRP1|L000002059	Affinity Capture-Western	Nishimura K (2009)	19915560	Low Throughput	-	-
YNL209W (Ssb2)	YER011W (Tir1)	1061698	YG103|Hsp70 family ATPase SSB2|L000002715	SRP1|L000002059	Co-purification	Willmund F (2013)	23332755	High Throughput	-	isolation of cotranslationally bound SSB-RNC complexes allows us to identify the chaperone-bound nascent polypeptides through analysis of the mRNAs encoding the substrates
YAL021C (Ccr4)	YER011W (Tir1)	2351515	FUN27|NUT21|CCR4-NOT core exoribonuclease subunit CCR4|L000000239	SRP1|L000002059	Affinity Capture-RNA	Miller JE (2017)	29158339	High Throughput	-	-
YDL160C (Dhh1)	YER011W (Tir1)	2391152	DExD/H-box ATP-dependent RNA helicase DHH1|L000000504	SRP1|L000002059	Affinity Capture-RNA	Jungfleisch J (2017)	27821408	High Throughput	-	CRAC
YOR198C (Bfr1)	YER011W (Tir1)	2395362	L000000174	SRP1|L000002059	Affinity Capture-RNA	Lapointe CP (2015)	26524240	High Throughput	-	RNA Tagging
YOR001W (Rrp6)	YER011W (Tir1)	2455416	exosome nuclease subunit RRP6|L000003540	SRP1|L000002059	Affinity Capture-MS	Gonzales-Zubiate FA (2017)	28539363	High Throughput	-	-
YNL209W (Ssb2)	YOR010C (Tir2)	1062193	YG103|Hsp70 family ATPase SSB2|L000002715	SRP2|L000002312	Co-purification	Willmund F (2013)	23332755	High Throughput	-	isolation of cotranslationally bound SSB-RNC complexes allows us to identify the chaperone-bound nascent polypeptides through analysis of the mRNAs encoding the substrates
YBR245C (Isw1)	YOR010C (Tir2)	2337570	SGN2|chromatin-remodeling ATPase ISW1|L000004447	SRP2|L000002312	Affinity Capture-RNA	Babour A (2016)	27863241	High Throughput	-	in npl3 mutant background
YIL011W (Tir3)	YMR201C (Rad14)	114014	YIB1	L000001564	Two-hybrid	Uetz P (2000)	10688190	High Throughput	-	-
YBL032W (Hek2)	YIL011W (Tir3)	320819	KHD1	YIB1	Affinity Capture-RNA	Hasegawa Y (2008)	18805955	High Throughput	-	-
YBR245C (Isw1)	YIL011W (Tir3)	2337026	SGN2|chromatin-remodeling ATPase ISW1|L000004447	YIB1	Affinity Capture-RNA	Babour A (2016)	27863241	High Throughput	-	in npl3 mutant background
YAL021C (Ccr4)	YIL011W (Tir3)	2352397	FUN27|NUT21|CCR4-NOT core exoribonuclease subunit CCR4|L000000239	YIB1	Affinity Capture-RNA	Miller JE (2017)	29158339	High Throughput	-	-
YOR254C (Sec63)	YIL011W (Tir3)	2450860	PTL1|protein-transporting protein SEC63|L000001854|L000001269	YIB1	Two-hybrid	Rizzolo K (2018)	29659649	High Throughput	-	MYTH
YOR009W (Tir4)	YGR211W (Zpr1)	187251	-	L000004700	Affinity Capture-MS	Krogan NJ (2006)	16554755	High Throughput	-	-
YOR009W (Tir4)	YOL006C (Top1)	187252	-	MAK1|MAK17|DNA topoisomerase 1|L000002319	Affinity Capture-MS	Krogan NJ (2006)	16554755	High Throughput	-	-
YPL240C (Hsp82)	YOR009W (Tir4)	149627	HSP90|Hsp90 family chaperone HSP82|L000000822	-	Two-hybrid	Zhao R (2005)	15766533	High Throughput	-	-
YJR049C (Utr1)	YOR009W (Tir4)	274032	L000002680	-	PCA	Tarassov K (2008)	18467557	High Throughput	-	-
YBL032W (Hek2)	YOR009W (Tir4)	321082	KHD1	-	Affinity Capture-RNA	Hasegawa Y (2008)	18805955	High Throughput	-	-
YMR080C (Nam7)	YOR009W (Tir4)	857305	IFS2|MOF4|SUP113|UPF1|ATP-dependent RNA helicase NAM7|L000002429|S000029550|L000002232	-	Affinity Capture-RNA	Johansson MJ (2007)	18087042	High Throughput	-	Transcript signal intensity, between the Upf1p-TAP and mock samples, showed a relative change of at least 2-fold. This change was reproducible in at least three of four replicate experiments and demonstrated a statistically significant P value.
YAL021C (Ccr4)	YOR009W (Tir4)	2354336	FUN27|NUT21|CCR4-NOT core exoribonuclease subunit CCR4|L000000239	-	Affinity Capture-RNA	Miller JE (2017)	29158339	High Throughput	-	-

## Sheet: Table S10
Table S10. Genetic interactions of 32 mannoproteins. Data obtained from Costanzo et al. (2016).
Systematic name (standard name)	Mannoprotein	Pie score	P value	Mannoprotein cluster1
YMR291W_dma3897_DMA30 (TDA1)	SUN4	-0.9305	0	V
YCR061W_sn3432	DAN1	-0.9218	1.29e-88	IV
YCL026C_dma504_DMA30	FIT2	-0.895	1.72e-97	III
YJL183W_sn910 (MNN11)	ECM33	-0.8685	1.04e-62	VI
YCR094W_sn1606 (CDC50)	FLO1	-0.8537	9.52e-62	III
YCR059C_dma568_DMA30	FIT2	-0.7803	6.86e-40	III
YPL158C_dma5360_DMA30 (AIM44)	HSP150	-0.7515	5.3e-48	IV
YEL036C_sn859 (ANP1)	ECM33	-0.7392	5.38e-38	VI
YHR030C_sn752 (SLT2)	ECM33	-0.732	2.13e-42	VI
YLR102C_dma3203_DMA30 (APC9)	FIT2	-0.6768	1.97e-35	III
YLR425W_sn763 (TUS1)	HSP150	-0.671	7.53e-54	IV
YJR075W_sn702 (HOC1)	ECM33	-0.6618	1.11e-27	VI
YPR046W_sn1223 (MCM16)	DAN1	-0.6472	4.83e-20	IV
YKL010C_sn354 (UFD4)	DAN1	-0.6462	1.84e-34	IV
YNL181W_tsq2245	HSP150	-0.6357	3.02e-18	IV
YHR030C_sn752 (SLT2)	CCW12	-0.6304	7.63e-48	I
YCL033C_dma497_DMA30 (MXR2)	FIT2	-0.5973	1.76e-38	III
YCL056C_dma525_DMA30 (PEX34)	FIT2	-0.5903	6.81e-35	III
YLR181C_dma3244_DMA30 (VTA1)	FIT2	-0.5889	1.96e-19	III
YNL055C_sn4586 (POR1)	DAN1	-0.5865	3.75e-36	IV
YMR030W-A_sn4574	FIT1	-0.5849	1.02e-16	III
YIL164C_dma2397_DMA30 (NIT1)	FIT2	-0.5849	2.45e-30	III
YMR198W_dma3800_DMA30 (CIK1)	SUN4	-0.5806	7.1e-45	V
YER147C_tsq1283 (SCC4)	DAN1	-0.5773	7.38e-11	IV
YJL117W_dma5181_DMA30 (PHO86)	FIT2	-0.5736	5e-16	III
YGR050C_dma1827_DMA30	PST1	-0.567	0.001206	III
YOR186W_sn3380	DAN1	-0.5642	2.24e-15	IV
YDR208W_tsq129 (MSS4)	ECM33	-0.5572	3.48e-31	VI
YFR007W_dma1518_DMA30	FIT2	-0.5521	4.34e-25	III
YOR035C_sn557 (SHE4)	ECM33	-0.5384	1.27e-25	VI
YFL039C_tsq1206 (ACT1)	ECM33	-0.5375	6.37e-22	VI
YPL155C_dma4874_DMA30 (KIP2)	FLO10	-0.5307	3.47e-15	III
YDR146C_dma927_DMA30 (SWI5)	HSP150	-0.5307	2.79e-17	IV
YBR085W_sn2491 (AAC3)	CWP1	-0.5292	4.68e-13	IV
YBR085W_sn2491 (AAC3)	CWP2	-0.5292	4.68e-13	IV
YGR203W_sn1158	ECM33	-0.5259	1.02e-11	VI
YDR146C_sn1347 (SWI5)	HSP150	-0.525	7.14e-19	IV
YNL098C_sn1067 (RAS2)	ECM33	-0.5236	1.57e-12	VI
YNL055C_sn4586 (POR1)	DSE2	-0.5204	5.66e-20	V
YIR042C_dma2442_DMA30	SPS2	-0.5162	2.78e-23	IV
YPR038W_dma5046_DMA30	DSE2	-0.5108	3.42e-17	V
YDR159W_sn1854 (SAC3)	DAN1	-0.5057	0	IV
YGL136C_dma1690_DMA30 (MRM2)	FLO11	-0.4931	8.53e-05	II
YKL059C_damp91 (MPE1)	ECM33	-0.4913	1.82e-14	VI
YLR425W_sn763 (TUS1)	PIR1	-0.4891	1.96e-32	IV
YJL078C_sn616 (PRY3)	FLO10	-0.4825	4.23e-11	III
YDL210W_sn2439 (UGA4)	DAN1	-0.4792	5.8e-16	IV
YMR122C_dma3716_DMA30	FIT2	-0.4787	4.06e-28	III
YBR036C_sn2202 (CSG2)	CCW12	-0.4765	4.09e-68	I
YOR281C_tsq2354 (PLP2)	DSE2	-0.4756	7.15e-08	V
YML100W_dma3594_DMA30 (TSL1)	SPS2	-0.4695	3.97e-24	IV
YNL006W_tsq1122 (LST8)	ECM33	-0.4693	3.74e-36	VI
YPL025C_dma4779_DMA30	FIT2	-0.4626	2.13e-09	III
YFL039C_tsq1093 (ACT1)	ECM33	-0.4616	1.61e-07	VI
YDR348C_sn608 (PAL1)	CCW12	-0.4586	3.33e-17	I
YPL043W_tsa660_TSA26 (NOP4)	CWP1	-0.4585	0	IV
YBR035C_sn2818 (PDX3)	DAN1	-0.457	2.4e-143	IV
YBL105C_tsa538_TSA26 (PKC1)	HSP150	-0.4559	9.14e-130	IV
YDR389W_sn1046 (SAC7)	ECM33	-0.4551	1.48e-101	VI
YJL095W_sn935 (BCK1)	ECM33	-0.4551	1.1e-09	VI
YDR293C_sn729 (SSD1)	ECM33	-0.4543	4.82e-136	VI
YIL171W_sn4529	DAN1	-0.4532	6.91e-08	IV
YOR035C_sn557 (SHE4)	CCW12	-0.4511	3.76e-49	I
YOR075W_tsq212 (UFE1)	DAN1	-0.4511	8.33e-13	IV
YPL170W_dma4898_DMA30 (DAP1)	DSE2	-0.4485	6.29e-12	V
YPL158C_sn609 (AIM44)	HSP150	-0.4464	6.25e-32	IV
YFL039C_tsq1094 (ACT1)	ECM33	-0.4422	1.21e-40	VI
YGL023C_sn535 (PIB2)	FLO1	-0.4417	2.23e-10	III
YLL036C_tsa247_TSA26 (PRP19)	SUN4	-0.4398	8.93e-19	V
YGR055W_dma5193_DMA30 (MUP1)	FIG2	-0.4311	3.5e-10	III
YGL136C_dma1690_DMA30 (MRM2)	SPS22	-0.4284	8.41e-10	IV
YPR032W_dma5048_DMA30 (SRO7)	TIR2	-0.4201	1.77e-33	IV
YDR282C_dma1042_DMA30 (MRX10)	FIT2	-0.4191	8.12e-08	III
YDR207C_dma979_DMA30 (UME6)	CWP1	-0.418	3.68e-14	IV
YDR207C_dma979_DMA30 (UME6)	CWP2	-0.418	3.68e-14	IV
YPR146C_dma5131_DMA30	FIT2	-0.417	4.66e-50	III
YLR179C_dma3246_DMA30	FIT2	-0.4152	8.89e-09	III
YBR215W_dma370_DMA30 (HPC2)	FIT2	-0.4117	3.35e-05	III
YCL050C_dma528_DMA30 (APA1)	FIT2	-0.4097	1.37e-08	III
YER003C_tsq1310 (PMI40)	ECM33	-0.4062	1.02e-13	VI
YKR063C_tsq2092 (LAS1)	DSE2	-0.4055	1.61e-06	V
YJL054W_tsq2057 (TIM54)	SPS2	-0.405	6.99e-07	IV
YBR278W_dma435_DMA30 (DPB3)	CWP1	-0.4041	3.07e-11	IV
YBR278W_dma435_DMA30 (DPB3)	CWP2	-0.4041	3.07e-11	IV
YER165W_tsq1838 (PAB1)	DSE2	-0.4038	3.57e-07	V
YPR126C_dma5120_DMA30	DAN1	-0.4033	1.48e-10	IV
YDR066C_dma858_DMA30 (RTR2)	FIT2	-0.4032	3.44e-08	III
YLR028C_dma3130_DMA30 (ADE16)	TIR2	-0.4013	0.001846	IV
YIL129C_tsq2031 (TAO3)	ECM33	-0.3969	8.77e-08	VI
YPL074W_dma4813_DMA30	FLO10	-0.3966	1.58e-08	III
YPL032C_dma4798_DMA30 (SVL3)	SED1	-0.3957	1.17e-06	IV
YLR205C_sn2193 (HMX1)	CWP1	-0.3949	1.14e-06	IV
YLR205C_sn2193 (HMX1)	CWP2	-0.3949	1.14e-06	IV
YEL036C_sn859 (ANP1)	SED1	-0.3937	6.5e-09	IV
YHR080C_dma2127_DMA30 (LAM4)	FIT2	-0.3931	6.25e-06	III
YBR277C_dma436_DMA30	CWP1	-0.3907	1.05e-10	IV
YBR277C_dma436_DMA30	CWP2	-0.3907	1.05e-10	IV
YKR047W_dma2954_DMA30	SUN4	-0.39	1.76e-05	V
YLL047W_dma3094_DMA30	FIT2	-0.3881	3.81e-07	III
YIL103W_dma2345_DMA30 (DPH1)	SPS2	-0.387	8.66e-11	IV
YNL181W_tsq1679	HSP150	-0.3861	7.16e-14	IV
YER156C_sn3582	PST1	-0.3845	3.31e-08	III
YFL039C_tsq1206 (ACT1)	HSP150	-0.3842	2.01e-11	IV
YOL147C_dma4409_DMA30 (PEX11)	FIT2	-0.3834	7.48e-06	III
YDR388W_dma1128_DMA30 (RVS167)	DSE2	-0.3808	3.64e-07	V
YER127W_tsq1836 (LCP5)	DSE2	-0.3805	7.74e-06	V
YML115C_sn861 (VAN1)	CIS3	-0.3801	8.59e-86	III
YCL061C_dma522_DMA30 (MRC1)	SPS2	-0.3795	1.01e-11	IV
YBL105C_tsq538 (PKC1)	PIR1	-0.3784	1.08e-18	IV
YCL026C-A_dma503_DMA30 (FRM2)	FIT2	-0.3761	1.36e-07	III
YPL209C_damp1044 (IPL1)	FIT1	-0.3755	5.16e-08	III
YDR085C_dma880_DMA30 (AFR1)	FIT2	-0.3751	2.28e-07	III
YDR212W_tsa448_TSA26 (TCP1)	CCW12	-0.3731	3.07e-15	I
YER093C_tsq658 (TSC11)	ECM33	-0.3722	6.46e-07	VI
YOR314W_dma4727_DMA30	DSE2	-0.3708	1.85e-08	V
YCL022C_dma472_DMA30	SUN4	-0.3686	1.05e-06	V
YPR179C_dma5157_DMA30 (HDA3)	FIT2	-0.3682	7.88e-08	III
YOR222W_dma4643_DMA30 (ODC2)	FIT2	-0.368	3.35e-09	III
YOR280C_dma4673_DMA30 (FSH3)	SAG1	-0.3675	8.07e-09	VII
YNL262W_tsq20 (POL2)	FIT2	-0.3671	0.0005828	III
YNR035C_tsq471 (ARC35)	ECM33	-0.3668	2.57e-05	VI
YLR459W_tsq1254 (GAB1)	DAN1	-0.3662	0.0001957	IV
YER111C_sn1342 (SWI4)	ECM33	-0.365	1.6e-11	VI
YBL007C_sn761 (SLA1)	CCW12	-0.3639	1.45e-15	I
YER163C_dma1462_DMA30 (GCG1)	FIT2	-0.3639	2.68e-10	III
YPL105C_dma4840_DMA30 (SYH1)	FIT2	-0.3624	1.68e-05	III
YHR142W_sn208 (CHS7)	CCW12	-0.359	2.53e-09	I
YJL125C_tsa620_TSA26 (GCD14)	SRL1	-0.3587	0.0007964	II
YMR156C_dma3748_DMA30 (TPP1)	FIT2	-0.3579	2.21e-11	III
YCL061C_dma522_DMA30 (MRC1)	SED1	-0.3564	9.89e-11	IV
YDL001W_dma622_DMA30 (RMD1)	FIT3	-0.3536	8.25e-09	IV
YBR293W_dma445_DMA30 (VBA2)	SUN4	-0.3536	4.98e-08	V
YFL039C_tsq1206 (ACT1)	CCW12	-0.3535	3.03e-21	I
YLR065C_dma3145_DMA30 (ENV10)	DSE2	-0.3531	2.93e-37	V
YOL135C_tsa740_TSA26 (MED7)	SUN4	-0.3527	8.37e-05	V
YPR201W_sn2211 (ARR3)	DAN1	-0.352	4.2e-05	IV
YBR119W_dma266_DMA30 (MUD1)	SUN4	-0.3517	2.34e-05	V
YJR076C_tsq76 (CDC11)	ECM33	-0.3513	3.66e-05	VI
YFL039C_tsq903 (ACT1)	DAN1	-0.3501	0.001171	IV
YPL023C_dma4781_DMA30 (MET12)	CWP1	-0.3499	2.05e-08	IV
YPL023C_dma4781_DMA30 (MET12)	CWP2	-0.3499	2.05e-08	IV
YIL165C_dma2396_DMA30	SUN4	-0.3497	2.1e-11	V
YDL121C_dma702_DMA30	SPS2	-0.3489	3.11e-08	IV
YNL181W_tsq2249	HSP150	-0.3485	2.64e-23	IV
YDR434W_tsq1417 (GPI17)	FIG2	-0.3469	2.92e-13	III
YER042W_sn1000 (MXR1)	ECM33	-0.3466	4.95e-06	VI
YMR193C-A_dma3804_DMA30	FIT2	-0.3464	0.0001723	III
YOR065W_dma4481_DMA30 (CYT1)	HSP150	-0.3456	9.82e-13	IV
YNL181W_tsq2251	HSP150	-0.3455	1.83e-15	IV
YMR307W_dma3905_DMA30 (GAS1)	CWP1	-0.3447	1.31e-73	IV
YMR307W_dma3905_DMA30 (GAS1)	CWP2	-0.3447	1.31e-73	IV
YJR117W_sn882 (STE24)	SPS2	-0.3437	1.72e-08	IV
YIR006C_tsq353 (PAN1)	ECM33	-0.3434	2.21e-12	VI
YHR188C_tsq1411 (GPI16)	FIG2	-0.3429	6.59e-14	III
YGR205W_dma1961_DMA30 (TDA10)	SPS2	-0.3424	8.44e-05	IV
YHL021C_sn2504 (AIM17)	FIT1	-0.3423	0.01263	III
YGR292W_dma5298_DMA30 (MAL12)	DSE2	-0.3418	0.0005697	V
YOR281C_tsq2354 (PLP2)	SPS2	-0.3379	0.0001532	IV
YJL125C_tsa620_TSA26 (GCD14)	CCW12	-0.3372	0.0004385	I
YDL053C_sn1711 (PBP4)	DSE2	-0.3372	0.0003655	V
YJR076C_tsq356 (CDC11)	ECM33	-0.3372	4.59e-07	VI
YDR156W_dma940_DMA30 (RPA14)	FIT2	-0.336	2.61e-07	III
YFL039C_tsq1257 (ACT1)	HSP150	-0.335	4.65e-09	IV
YOL088C_sn345 (MPD2)	SPS2	-0.3343	6.47e-08	IV
YPL034W_sn3387	DAN1	-0.3342	1.57e-05	IV
YOL033W_damp1155 (MSE1)	PIR1	-0.3337	2.96e-12	IV
YBR269C_dma421_DMA30 (SDH8)	SUN4	-0.3322	5.01e-20	V
YDR080W_dma883_DMA30 (VPS41)	TIR2	-0.3317	0.0001936	IV
YER046W_dma1334_DMA30 (SPO73)	SUN4	-0.3301	4.02e-07	V
YMR307W_dma3905_DMA30 (GAS1)	CIS3	-0.3299	1.19e-12	III
YPL037C_dma4794_DMA30 (EGD1)	SUN4	-0.3292	5.23e-06	V
YNL138W_tsq1176 (SRV2)	ECM33	-0.3285	5.74e-37	VI
YOL144W_tsa1025_TSA26 (NOP8)	SUN4	-0.3281	1.43e-23	V
YDL172C_dma735_DMA30	SUN4	-0.327	3.26e-05	V
YER114C_dma1415_DMA30 (BOI2)	FIT2	-0.3269	9.17e-08	III
YER098W_sn4144 (UBP9)	PST1	-0.3269	4.08e-05	III
YPL209C_damp1044 (IPL1)	FLO1	-0.3263	0.0001766	III
YHR067W_sn2812 (HTD2)	SPS22	-0.3251	1.16e-12	IV
YDR080W_dma883_DMA30 (VPS41)	DSE2	-0.3245	0.007385	V
YGL151W_dma1703_DMA30 (NUT1)	SUN4	-0.3237	0.000162	V
YJR024C_dma2623_DMA30 (MDE1)	FIT2	-0.3235	1.76e-07	III
YGL022W_tsq1127 (STT3)	SED1	-0.323	1.67e-42	IV
YEL041W_sn1129	FLO10	-0.3227	8.97e-05	III
YFL039C_tsq140 (ACT1)	ECM33	-0.3215	1.93e-05	VI
YLR323C_tsq2116 (CWC24)	DSE2	-0.3211	0.0004553	V
YDL006W_sn903 (PTC1)	CCW12	-0.32	2.74e-18	I
YJL095W_sn935 (BCK1)	CCW12	-0.3199	8.6e-09	I
YGL208W_sn1949 (SIP2)	FLO10	-0.3197	8.07e-13	III
YKL212W_dma2911_DMA30 (SAC1)	TIR2	-0.3196	2.93e-63	IV
YKL212W_dma2911_DMA30 (SAC1)	SPS2	-0.3194	0	IV
YDR324C_tsq1775 (UTP4)	CCW12	-0.3166	2.47e-05	I
YBR218C_dma367_DMA30 (PYC2)	DAN1	-0.3165	2.05e-05	IV
YGR088W_sn2163 (CTT1)	FLO10	-0.3154	7.58e-10	III
YOR333C_dma5347_DMA30	SUN4	-0.3144	0.0001875	V
YKL050C_dma2780_DMA30	SUN4	-0.314	0.0004682	V
YGR270W_dma2009_DMA30	SPS2	-0.3134	3.67e-22	IV
YFL039C_tsa223_TSA26 (ACT1)	CCW12	-0.3124	4.37e-07	I
YPL144W_dma4881_DMA30 (POC4)	SED1	-0.3114	0.001663	IV
YJR054W_dma2649_DMA30 (KCH1)	SPS2	-0.311	0.0002545	IV
YIL160C_dma2378_DMA30 (POT1)	FIT3	-0.3097	7.2e-71	IV
YLR371W_sn764 (ROM2)	CCW12	-0.3091	8.41e-28	I
YDR105C_sn3682 (TMS1)	CCW12	-0.309	5.53e-11	I
YGL208W_sn1949 (SIP2)	DAN1	-0.3086	4.89e-06	IV
YBR110W_tsq1087 (ALG1)	FIG2	-0.3084	2.54e-11	III
YDL029W_tsq886 (ARP2)	FIG2	-0.3084	1.52e-14	III
YDR276C_sn2346 (PMP3)	FIG2	-0.3079	1.2e-15	III
YDR335W_dma1070_DMA30 (MSN5)	SED1	-0.3078	2.42e-05	IV
YDL076C_dma650_DMA30 (RXT3)	SUN4	-0.3077	3.08e-06	V
YOR205C_sn2522 (GEP3)	TIR2	-0.3075	6.5e-10	IV
YKL035W_damp685 (UGP1)	CCW12	-0.3072	4.72e-08	I
YJR076C_tsq126 (CDC11)	ECM33	-0.307	3.61e-91	VI
YKL203C_tsq838 (TOR2)	ECM33	-0.3062	4.76e-16	VI
YHR132C_sn728 (ECM14)	SUN4	-0.3062	7.88e-08	V
YIL062C_tsa888_TSA26 (ARC15)	CCW12	-0.3061	2.26e-12	I
YBL047C_sn164 (EDE1)	CCW12	-0.3059	1.31e-08	I
YML088W_sn1673 (UFO1)	CCW14	-0.3056	8.45e-05	II
YLR115W_tsq1458 (CFT2)	PIR3	-0.3051	6.64e-05	IV
YGR259C_dma1993_DMA30	FLO10	-0.3042	0.0003545	III
YGR156W_tsq835 (PTI1)	ECM33	-0.304	1.15e-18	VI
YOL108C_dma4387_DMA30 (INO4)	SED1	-0.304	0	IV
YLR113W_dma3195_DMA30 (HOG1)	SUN4	-0.3038	3.89e-05	V
YFR041C_dma1579_DMA30 (ERJ5)	FIT2	-0.3022	1.36e-10	III
YGR087C_sn2804 (PDC6)	DSE2	-0.3019	0.0019	V
YGR142W_dma1886_DMA30 (BTN2)	FLO10	-0.3019	5.1e-08	III
YMR222C_sn4314 (FSH2)	FLO10	-0.3016	7.56e-07	III
YOR128C_dma5352_DMA30 (ADE2)	SUN4	-0.3016	0.005638	V
YDL071C_dma652_DMA30	CWP1	-0.3014	1.39e-06	IV
YDL071C_dma652_DMA30	CWP2	-0.3014	1.39e-06	IV
YMR109W_sn1183 (MYO5)	ECM33	-0.3014	1.12e-06	VI
YJR011C_dma2606_DMA30	CIS3	-0.3009	0.01777	III
YPL041C_dma4791_DMA30 (MRX11)	DSE2	-0.3005	1.14e-06	V
YPL036W_dma4795_DMA30 (PMA2)	FIT2	-0.3005	0.0009145	III
YJR065C_tsa341_TSA26 (ARP3)	CCW12	-0.2998	4.08e-13	I
YPL049C_sn838 (DIG1)	DSE2	-0.2989	0.0001013	V
YMR200W_tsa1103_TSA26 (ROT1)	CCW12	-0.2988	7.15e-07	I
YGL022W_tsa551_TSA26 (STT3)	HSP150	-0.298	3.51e-35	IV
YNR035C_tsa471_TSA26 (ARC35)	CCW12	-0.2977	0.0001959	I
YDR104C_dma912_DMA30 (SPO71)	CWP1	-0.2974	4.82e-05	IV
YDR104C_dma912_DMA30 (SPO71)	CWP2	-0.2974	4.82e-05	IV
YCR090C_dma611_DMA30	FIT2	-0.2973	0.005596	III
YCL005W-A_sn4493 (VMA9)	HSP150	-0.2973	1.44e-07	IV
YGL073W_tsq1116 (HSF1)	FIG2	-0.2965	3.31e-18	III
YBR154C_tsa1110_TSA26 (RPB5)	PST1	-0.2959	0.000353	III
YOR103C_damp966 (OST2)	CCW12	-0.2957	3.24e-13	I
YGL114W_sn4702	ECM33	-0.2957	4.34e-11	VI
YIL048W_tsa188_TSA26 (NEO1)	CCW12	-0.2952	1.4e-08	I
YGL084C_sn2223 (GUP1)	ECM33	-0.295	4.34e-06	VI
YMR126C_dma3713_DMA30 (DLT1)	SAG1	-0.2949	3.66e-05	VII
YOL121C_sn3994 (RPS19A)	CWP1	-0.294	2.88e-09	IV
YDR291W_dma1036_DMA30 (HRQ1)	CWP1	-0.294	0.0001405	IV
YDR291W_dma1036_DMA30 (HRQ1)	CWP2	-0.294	0.0001405	IV
YPR032W_dma5048_DMA30 (SRO7)	DAN1	-0.2939	0.04717	IV
YFL039C_tsa137_TSA26 (ACT1)	CCW12	-0.2937	5.1e-06	I
YGR065C_tsq1932 (VHT1)	FIT1	-0.2937	0.000279	III
YBL036C_dma132_DMA30	FLO10	-0.2929	0.0001266	III
YGR161C_sn1520 (RTS3)	PST1	-0.2928	1.96e-06	III
YGR097W_dma1870_DMA30 (ASK10)	SPS2	-0.2927	0.0188	IV
YNL085W_sn2135 (MKT1)	CWP1	-0.2917	6.37e-08	IV
YNL085W_sn2135 (MKT1)	CWP2	-0.2917	6.37e-08	IV
YML106W_dma3610_DMA30 (URA5)	FIT2	-0.2912	6.77e-07	III
YPL079W_dma4835_DMA30 (RPL21B)	DSE2	-0.291	0.0004616	V
YDL186W_dma790_DMA30	SPS2	-0.2902	6.51e-07	IV
YLR409C_tsq2147 (UTP21)	DSE2	-0.2901	8.65e-05	V
YER093C_tsq659 (TSC11)	ECM33	-0.2896	1.25e-16	VI
YJR035W_dma2639_DMA30 (RAD26)	FIT2	-0.2895	4.33e-05	III
YOL044W_dma4309_DMA30 (PEX15)	SUN4	-0.2894	0.000713	V
YKL205W_dma2893_DMA30 (LOS1)	FIT2	-0.2893	0.00644	III
YMR003W_dma3615_DMA30 (AIM34)	SPS22	-0.2891	9.15e-06	IV
YFL039C_tsq1257 (ACT1)	ECM33	-0.2886	0.003063	VI
YBR085W_sn2491 (AAC3)	SPS2	-0.2882	6.45e-06	IV
YCR052W_tsq1433 (RSC6)	DSE2	-0.2858	0.0006143	V
YLL024C_dma3040_DMA30 (SSA2)	SUN4	-0.2855	0.001345	V
YGR233C_dma1986_DMA30 (PHO81)	FLO10	-0.2852	5.17e-07	III
YJR065C_tsq1203 (ARP3)	CCW12	-0.285	2.49e-07	I
YPL022W_dma4782_DMA30 (RAD1)	DSE2	-0.2849	0.01331	V
YPL034W_dma4796_DMA30	SED1	-0.2849	0.0008323	IV
YDR279W_dma1021_DMA30 (RNH202)	SUN4	-0.2844	0.0003817	V
YGR094W_damp523 (VAS1)	FIT2	-0.284	0.0002093	III
YMR030W_dma3639_DMA30 (RSF1)	SPS2	-0.2835	2.59e-05	IV
YDL186W_dma790_DMA30	FIT3	-0.2833	0.0008996	IV
YCR061W_dma566_DMA30	CWP1	-0.2826	0.0009673	IV
YCR061W_dma566_DMA30	CWP2	-0.2826	0.0009673	IV
YOR114W_dma4547_DMA30	SED1	-0.2825	0.001762	IV
YDR108W_dma909_DMA30 (TRS85)	FIT2	-0.2822	0.0001239	III
YDR293C_sn729 (SSD1)	HSP150	-0.282	5.64e-12	IV
YPL034W_dma4796_DMA30	SUN4	-0.2814	0.001052	V
YDR006C_dma836_DMA30 (SOK1)	CWP1	-0.2795	0.003871	IV
YDR006C_dma836_DMA30 (SOK1)	CWP2	-0.2795	0.003871	IV
YPL157W_dma4908_DMA30 (TGS1)	DSE2	-0.2792	2.61e-55	V
YPR161C_tsq1029 (SGV1)	CCW12	-0.2788	1.95e-07	I
YLR168C_sn2586 (UPS2)	CWP1	-0.2788	9.26e-05	IV
YLR168C_sn2586 (UPS2)	CWP2	-0.2788	9.26e-05	IV
YAL019W_dma34_DMA30 (FUN30)	FIT3	-0.2787	0.001854	IV
YOL116W_sn269 (MSN1)	ECM33	-0.2786	0.000394	VI
YBR023C_sn1236 (CHS3)	CCW12	-0.2784	4.04e-06	I
YER187W_sn3176	PIR1	-0.2774	9.3e-08	IV
YOR085W_dma4524_DMA30 (OST3)	SED1	-0.2768	5.85e-05	IV
YPR161C_tsa1251_TSA26 (SGV1)	SUN4	-0.2768	3.63e-05	V
YGL136C_dma1690_DMA30 (MRM2)	SPS2	-0.2767	1.7e-51	IV
YJL145W_dma2543_DMA30 (SFH5)	FIT2	-0.276	0.0001098	III
YDR456W_sn487 (NHX1)	CCW12	-0.2752	3.37e-08	I
YPL057C_sn2989 (SUR1)	CCW12	-0.2751	1.99e-09	I
YNL138W_tsa800_TSA26 (SRV2)	CCW12	-0.2747	7.21e-08	I
YOL108C_dma4387_DMA30 (INO4)	CWP1	-0.2747	0.001134	IV
YOL108C_dma4387_DMA30 (INO4)	CWP2	-0.2747	0.001134	IV
YMR069W_sn3840 (NAT4)	SPS22	-0.2744	8.72e-08	IV
YKR019C_dma2933_DMA30 (IRS4)	FIT2	-0.2735	0.001303	III
YBL061C_sn1237 (SKT5)	CCW12	-0.2732	7.8e-05	I
YPR074C_dma5065_DMA30 (TKL1)	TIR2	-0.273	0.004074	IV
YLR026C_tsa198_TSA26 (SED5)	SRL1	-0.2729	9.55e-05	II
YBR053C_dma221_DMA30	SPS2	-0.272	0.0003749	IV
YBR274W_dma439_DMA30 (CHK1)	TIR2	-0.2719	0.003361	IV
YLL006W_sn2680 (MMM1)	PST1	-0.2713	1.6e-06	III
YML037C_sn43	DAN1	-0.2712	5.16e-08	IV
YDR060W_tsa250_TSA26 (MAK21)	SUN4	-0.2711	7.63e-05	V
YHR034C_dma2108_DMA30 (PIH1)	FLO10	-0.271	0.003831	III
YDR058C_dma862_DMA30 (TGL2)	CWP1	-0.2709	0.001009	IV
YDR058C_dma862_DMA30 (TGL2)	CWP2	-0.2709	0.001009	IV
YJR065C_tsq1203 (ARP3)	FIG2	-0.2696	2.9e-26	III
YGR122C-A_dma5292_DMA30	SAG1	-0.2696	0.0004982	VII
YOR281C_damp153 (PLP2)	CCW12	-0.2694	9.5e-05	I
YPL034W_sn3387	DSE2	-0.269	0.002542	V
YNL097C_dma4020_DMA30 (PHO23)	CIS3	-0.2683	5.61e-05	III
YBR297W_sn2034 (MAL33)	ECM33	-0.2683	0.0005153	VI
YGL212W_dma1732_DMA30 (VAM7)	DSE2	-0.2677	0.002288	V
YDR072C_dma853_DMA30 (IPT1)	SUN4	-0.2677	0.003157	V
YOR181W_tsq230 (LAS17)	SPS2	-0.2674	6.85e-07	IV
YDL035C_dma628_DMA30 (GPR1)	FIT2	-0.2672	0.03659	III
YOR186W_sn3380	FLO10	-0.267	0.0008779	III
YJR065C_tsa341_TSA26 (ARP3)	FLO11	-0.267	7.66e-06	II
YNR051C_dma4271_DMA30 (BRE5)	SPS2	-0.2669	0.003921	IV
YPL071C_dma4815_DMA30	FIT2	-0.2667	5.1e-07	III
YEL065W_sn2195 (SIT1)	SUN4	-0.2666	5.01e-05	V
YLL050C_tsq1261 (COF1)	ECM33	-0.2665	4.02e-18	VI
YOL162W_dma4423_DMA30	FIT2	-0.2665	1.81e-06	III
YPL158C_dma5360_DMA30 (AIM44)	CCW14	-0.2663	3.34e-05	II
YER155C_sn766 (BEM2)	ECM33	-0.266	6.8e-34	VI
YOR380W_sn2046 (RDR1)	DAN1	-0.2659	0.002086	IV
YPL066W_dma4820_DMA30 (RGL1)	HSP150	-0.2659	2.43e-09	IV
YIL160C_dma2378_DMA30 (POT1)	FIT1	-0.2658	0.000926	III
YNR051C_dma4271_DMA30 (BRE5)	CCW14	-0.2657	0.003028	II
YBR263W_dma425_DMA30 (SHM1)	SPS2	-0.2657	1.83e-05	IV
YER039C_sn20 (HVG1)	DSE2	-0.2652	0.007259	V
YNR006W_sn369 (VPS27)	CCW12	-0.2646	6.71e-56	I
YGR232W_dma1988_DMA30 (NAS6)	FLO10	-0.2646	0.003989	III
YGR260W_dma2015_DMA30 (TNA1)	CIS3	-0.2645	0.007016	III
YLR278C_dma3316_DMA30	CIS3	-0.2644	0.001962	III
YPL074W_dma4813_DMA30	CCW14	-0.2642	0.0001064	II
YDL015C_damp267 (TSC13)	CCW12	-0.2638	6.99e-15	I
YEL036C_sn859 (ANP1)	CCW12	-0.2638	8.15e-14	I
YLR020C_dma3111_DMA30	FIT2	-0.2638	0.0001881	III
YGL045W_dma1630_DMA30 (RIM8)	SPS2	-0.2635	2.81e-05	IV
YDR403W_dma1118_DMA30 (DIT1)	FIT2	-0.2627	0.002634	III
YKR024C_sn1681 (DBP7)	ECM33	-0.2619	0.0005366	VI
YAL023C_dma31_DMA30 (PMT2)	SPS2	-0.2619	0.001921	IV
YGL124C_dma1674_DMA30 (MON1)	DAN1	-0.2618	3.54e-05	IV
YOL119C_sn2438 (MCH4)	ECM33	-0.2616	7.7e-135	VI
YOL057W_sn3640	DAN1	-0.2615	4.4e-33	IV
YGL197W_sn1489 (MDS3)	FIT1	-0.2611	0.001124	III
YMR316W_dma3920_DMA30 (DIA1)	SED1	-0.2611	0.0008093	IV
YMR086C-A_dma3673_DMA30	FIT2	-0.261	0.0001114	III
YOR226C_dma4640_DMA30 (ISU2)	SED1	-0.2609	0.0002631	IV
YIL057C_dma2284_DMA30 (RGI2)	FIT2	-0.2608	0.01804	III
YDR182W_tsq1181 (CDC1)	DAN1	-0.2606	5.69e-13	IV
YBL105C_tsq537 (PKC1)	CWP1	-0.2604	3.21e-05	IV
YBL105C_tsq537 (PKC1)	CWP2	-0.2604	3.21e-05	IV
YAR014C_sn784 (BUD14)	FIT1	-0.2602	9.53e-10	III
YBR300C_dma462_DMA30	FIT2	-0.26	0.0002955	III
YDL060W_tsq1737 (TSR1)	FIT1	-0.2596	0.0002183	III
YLL054C_sn1745	ECM33	-0.2592	0.0004305	VI
YDL039C_dma647_DMA30 (PRM7)	FIT2	-0.2587	0.0002979	III
YDR494W_sn4130 (RSM28)	ECM33	-0.2585	2.17e-09	VI
YDR010C_dma832_DMA30	DAN1	-0.2582	0.01182	IV
YDL186W_dma790_DMA30	FIT1	-0.2582	0.002354	III
YGL136C_dma1690_DMA30 (MRM2)	CWP1	-0.257	0.02031	IV
YGL136C_dma1690_DMA30 (MRM2)	CWP2	-0.257	0.02031	IV
YDR471W_sn3962 (RPL27B)	CWP1	-0.2569	0.0009839	IV
YDR471W_sn3962 (RPL27B)	CWP2	-0.2569	0.0009839	IV
YDR067C_dma857_DMA30 (OCA6)	FIT2	-0.2567	0.0009934	III
YOR180C_sn2808 (DCI1)	CCW12	-0.2566	2.08e-08	I
YOR161C_dma4566_DMA30 (PNS1)	FIT2	-0.2562	0.001388	III
YHR075C_sn4138 (PPE1)	DAN1	-0.2558	1.75e-05	IV
YNL055C_sn4586 (POR1)	FLO10	-0.2558	1.77e-07	III
YDL226C_sn205 (GCS1)	FIG2	-0.2555	0.00027	III
YGR083C_damp520 (GCD2)	TIR4	-0.2555	0.003696	IV
YNL138W_tsq675 (SRV2)	CCW12	-0.2554	1.6e-07	I
YLR192C_dma3257_DMA30 (HCR1)	DAN1	-0.2547	0.0003108	IV
YGL151W_dma1703_DMA30 (NUT1)	FIG2	-0.2545	0.0004114	III
YLR185W_dma3263_DMA30 (RPL37A)	SED1	-0.2541	2.75e-08	IV
YDR348C_dma1086_DMA30 (PAL1)	SPS2	-0.254	5.73e-05	IV
YNL138W_tsa800_TSA26 (SRV2)	SRL1	-0.2533	0.001221	II
YPR181C_tsq1198 (SEC23)	DAN1	-0.2532	0.0002592	IV
YPR153W_dma5148_DMA30	SED1	-0.2526	0.0001046	IV
YPR066W_dma5071_DMA30 (UBA3)	PST1	-0.2524	0.007904	III
YPL033C_dma4797_DMA30 (SRL4)	SUN4	-0.2523	0.002941	V
YCL001W-A_dma459_DMA30	CIS3	-0.2516	0.000172	III
YOR279C_dma4674_DMA30 (RFM1)	SED1	-0.2508	0.0004098	IV
YDL082W_dma680_DMA30 (RPL13A)	CIS3	-0.2505	0.000161	III
YLR229C_tsq29 (CDC42)	DAN1	-0.2503	8.09e-05	IV
YJL163C_dma2549_DMA30	FLO10	-0.2503	0.00145	III
YBR265W_tsa543_TSA26 (TSC10)	SUN4	-0.2503	1.26e-06	V
YGR255C_sn2733 (COQ6)	TIR4	-0.2501	0.0001139	IV
YNR035C_tsq471 (ARC35)	HSP150	-0.2499	1.76e-38	IV
YPL184C_dma4931_DMA30 (MRN1)	SED1	-0.2498	0.0001796	IV
YDR179C_dma950_DMA30 (CSN9)	FIT2	-0.2496	0.0007147	III
YGR261C_dma2014_DMA30 (APL6)	FLO10	-0.2496	0.00564	III
YPL041C_dma4791_DMA30 (MRX11)	SPS2	-0.2494	0.0122	IV
YGL151W_sn1982 (NUT1)	SPS2	-0.2491	9.87e-06	IV
YNL087W_sn605 (TCB2)	FLO1	-0.2489	0.00527	III
YCR054C_tsq1414 (CTR86)	SPS2	-0.2488	0.005413	IV
YLR371W_sn764 (ROM2)	CWP1	-0.2487	4.64e-07	IV
YLR371W_sn764 (ROM2)	CWP2	-0.2487	4.64e-07	IV
YPR001W_dma5027_DMA30 (CIT3)	SED1	-0.2483	0.0007349	IV
YMR307W_sn703 (GAS1)	HSP150	-0.248	7e-23	IV
YDL019C_dma614_DMA30 (OSH2)	SAG1	-0.248	1.82e-05	VII
YDR531W_damp418 (CAB1)	ECM33	-0.2469	2.05e-58	VI
YFL017C_damp451 (GNA1)	CCW12	-0.2466	2.39e-05	I
YFL039C_tsa142_TSA26 (ACT1)	CCW12	-0.2466	2.65e-05	I
YLR370C_sn583 (ARC18)	ECM33	-0.2463	7.14e-18	VI
YDL002C_dma621_DMA30 (NHP10)	CIS3	-0.2462	9.05e-05	III
YDL053C_dma638_DMA30 (PBP4)	CWP1	-0.2461	0.0002578	IV
YDL053C_dma638_DMA30 (PBP4)	CWP2	-0.2461	0.0002578	IV
YGR104C_damp1174 (SRB5)	DSE2	-0.2461	0.003397	V
YOL017W_sn1198 (ESC8)	SPI1	-0.2461	0.001241	III
YDL038C_dma625_DMA30	SUN4	-0.2461	0.001385	V
YDL149W_sn400 (ATG9)	CWP1	-0.2455	0.002169	IV
YDL149W_sn400 (ATG9)	CWP2	-0.2455	0.002169	IV
YDR084C_dma881_DMA30 (TVP23)	FIT2	-0.245	0.001444	III
YHR039C_dma2105_DMA30 (MSC7)	FLO10	-0.245	0.008702	III
YGL036W_sn3449	TIR4	-0.245	0.001409	IV
YOR250C_tsa1186_TSA26 (CLP1)	SUN4	-0.2448	0.01267	V
YPR191W_sn2480 (QCR2)	DAN1	-0.2447	0.0001753	IV
YMR298W_tsa1059_TSA26 (LIP1)	SUN4	-0.2447	0.01998	V
YDR087C_tsa181_TSA26 (RRP1)	HSP150	-0.2445	0.000905	IV
YLL009C_sn2634 (COX17)	TIR2	-0.2445	1.61e-08	IV
YDR419W_dma1133_DMA30 (RAD30)	CWP1	-0.244	0.003459	IV
YDR419W_dma1133_DMA30 (RAD30)	CWP2	-0.244	0.003459	IV
YGL136C_dma1690_DMA30 (MRM2)	DAN1	-0.244	0.0002212	IV
YIR006C_tsq353 (PAN1)	CCW12	-0.2438	3.86e-07	I
YPL055C_dma4805_DMA30 (LGE1)	FLO10	-0.2437	0.006705	III
YJL054W_tsq2057 (TIM54)	DSE2	-0.2436	0.009177	V
YOR223W_dma4642_DMA30 (DSC3)	SED1	-0.2436	0.001596	IV
YGR089W_sn1221 (NNF2)	DSE2	-0.2434	0.008708	V
YML028W_dma3534_DMA30 (TSA1)	FIT2	-0.2429	0.0003622	III
YJL133W_dma2530_DMA30 (MRS3)	FIT2	-0.2421	0.001288	III
YDR157W_dma939_DMA30	SUN4	-0.2421	0.001974	V
YGL253W_dma1769_DMA30 (HXK2)	SAG1	-0.242	0.0003808	VII
YPR024W_dma5032_DMA30	HSP150	-0.2419	0.003539	IV
YDR465C_dma1198_DMA30 (RMT2)	FIT3	-0.2417	1.3e-05	IV
YDR388W_sn171 (RVS167)	CCW12	-0.2412	1.12e-26	I
YCR031C_sn4134 (RPS14A)	PIR3	-0.2412	0.0001952	IV
YLR332W_sn775 (MID2)	CCW12	-0.241	2.6e-25	I
YDR057W_sn190	TIR4	-0.2409	6.2e-09	IV
YDR006C_dma836_DMA30 (SOK1)	SUN4	-0.2407	0.008627	V
YFL039C_tsa214_TSA26 (ACT1)	CCW12	-0.2404	0.0001097	I
YIL048W_tsq188 (NEO1)	CCW12	-0.2402	2.26e-42	I
YFL039C_tsq1094 (ACT1)	CCW12	-0.2401	2.75e-06	I
YML112W_dma5234_DMA30 (CTK3)	SAG1	-0.2399	0.001603	VII
YDR314C_dma1060_DMA30 (RAD34)	FIT2	-0.2398	0.002059	III
YGL042C_dma5186_DMA30	CIS3	-0.2395	0.0001058	III
YFL039C_tsq77 (ACT1)	CCW12	-0.2394	1.76e-08	I
YGL056C_sn1112 (SDS23)	CWP1	-0.239	0.004547	IV
YGL056C_sn1112 (SDS23)	CWP2	-0.239	0.004547	IV
YPL158C_sn609 (AIM44)	PIR1	-0.239	0.000126	IV
YPL103C_dma4841_DMA30 (FMP30)	DSE2	-0.2389	0.0002703	V
YMR052W_sn1177 (FAR3)	FLO10	-0.2389	0.002119	III
YOR233W_dma4634_DMA30 (KIN4)	DSE2	-0.2384	6.62e-16	V
YFR013W_dma1558_DMA30 (IOC3)	FIT1	-0.2382	0.00173	III
YJL115W_dma2518_DMA30 (ASF1)	SPS22	-0.2382	0.001112	IV
YGR174C_sn2692 (CBP4)	FIT2	-0.2379	0.0003702	III
YFL039C_tsq142 (ACT1)	ECM33	-0.2377	0.005949	VI
YNL301C_sn3948 (RPL18B)	DSE2	-0.2371	1.72e-07	V
YMR116C_dma3698_DMA30 (ASC1)	FLO11	-0.2361	0.004292	II
YBR141C_dma311_DMA30 (BMT2)	FIT2	-0.2359	0.003925	III
YER082C_tsq1826 (UTP7)	SPS2	-0.2355	0.005753	IV
YJR016C_damp656 (ILV3)	ECM33	-0.2354	1.67e-12	VI
YPL261C_dma5015_DMA30	SPS2	-0.2354	0.02828	IV
YFL039C_tsq223 (ACT1)	CCW12	-0.2353	2e-05	I
YGL238W_tsq1927 (CSE1)	CCW12	-0.2352	0.002866	I
YLR225C_sn3490	PIR3	-0.2347	0.001511	IV
YCR053W_dma569_DMA30 (THR4)	SAG1	-0.2347	0.0069	VII
YOR338W_dma4737_DMA30	SED1	-0.2346	5.25e-11	IV
YPL066W_sn1150 (RGL1)	HSP150	-0.2344	2.9e-05	IV
YJR017C_tsa698_TSA26 (ESS1)	SRL1	-0.2339	1.58e-07	II
YLR283W_sn2590	HSP150	-0.2338	1.71e-06	IV
YDL169C_dma738_DMA30 (UGX2)	CWP1	-0.2336	0.0001942	IV
YDL169C_dma738_DMA30 (UGX2)	CWP2	-0.2336	0.0001942	IV
YOL017W_sn1198 (ESC8)	FIT1	-0.2333	0.003019	III
YDR388W_sn171 (RVS167)	HSP150	-0.233	5.76e-15	IV
YAL004W_dma22_DMA30	FIT3	-0.2329	0.005142	IV
YMR016C_dma3628_DMA30 (SOK2)	CIS3	-0.2328	1.35e-08	III
YHR068W_damp563 (DYS1)	ECM33	-0.2322	9.67e-06	VI
YGR059W_sn769 (SPR3)	PIR1	-0.2321	0.009829	IV
YNL152W_damp891 (INN1)	CCW12	-0.2319	2.93e-06	I
YOR181W_tsa230_TSA26 (LAS17)	CCW12	-0.2319	4.86e-06	I
YPR130C_dma5116_DMA30	DSE2	-0.2318	2.5e-06	V
YBR177C_dma330_DMA30 (EHT1)	FIT2	-0.2315	0.03802	III
YFL033C_dma5267_DMA30 (RIM15)	DSE2	-0.2314	0.0003447	V
YER162C_dma1463_DMA30 (RAD4)	FIT2	-0.231	0.02155	III
YEL055C_tsq596 (POL5)	FLO1	-0.231	0.03567	III
YDL224C_sn1589 (WHI4)	DAN1	-0.2307	0.0002366	IV
YLR330W_sn464 (CHS5)	ECM33	-0.2306	0.0003458	VI
YOL014W_dma4285_DMA30	SUN4	-0.2305	0.009714	V
YFL034C-B_tsq1216 (MOB2)	CCW12	-0.2304	3e-05	I
YGR044C_dma1830_DMA30 (RME1)	CIS3	-0.2304	9.09e-07	III
YJL034W_tsq1092 (KAR2)	ECM33	-0.2303	5.95e-11	VI
YOL068C_dma4368_DMA30 (HST1)	SUN4	-0.23	0.00629	V
YDL143W_tsa729_TSA26 (CCT4)	CCW12	-0.2297	2.74e-07	I
YDL008W_tsa783_TSA26 (APC11)	PIR3	-0.2296	1.31e-21	IV
YOR346W_sn1278 (REV1)	CCW12	-0.2295	0.007321	I
YHR203C_dma2243_DMA30 (RPS4B)	SPS22	-0.2295	0.0195	IV
YEL002C_damp419 (WBP1)	CCW12	-0.2291	2.18e-05	I
YDL207W_tsa920_TSA26 (GLE1)	SUN4	-0.2291	0.0255	V
YFL039C_tsa220_TSA26 (ACT1)	SRL1	-0.229	6.22e-06	II
YLR315W_dma3372_DMA30 (NKP2)	DAN1	-0.2285	0.000595	IV
YOR337W_sn2075 (TEA1)	DSE2	-0.2285	0.01671	V
YDL185W_sn489 (VMA1)	CCW14	-0.2283	8.14e-06	II
YOR254C_tsq231 (SEC63)	ECM33	-0.228	0.0003687	VI
YNL181W_tsq1678	HSP150	-0.2279	0.0002066	IV
YGR229C_sn756 (SMI1)	PIR1	-0.2274	9.49e-07	IV
YOR220W_dma5205_DMA30 (RCN2)	SED1	-0.2273	0.004335	IV
YOR142W_dma4572_DMA30 (LSC1)	FIT2	-0.2271	5.99e-121	III
YFL039C_tsq223 (ACT1)	FIG2	-0.2269	6.33e-09	III
YBL047C_dma126_DMA30 (EDE1)	SPS2	-0.2267	0.002958	IV
YDL207W_tsq923 (GLE1)	FIT1	-0.2266	5.97e-05	III
YIL062C_tsq888 (ARC15)	ECM33	-0.2265	1.2e-05	VI
YDR388W_dma1128_DMA30 (RVS167)	TIR4	-0.2265	1.74e-74	IV
YML088W_sn1673 (UFO1)	FIT3	-0.2263	0.01338	IV
YKL164C_dma2873_DMA30 (PIR1)	HSP150	-0.2262	0.0002808	IV
YJL159W_sn731 (HSP150)	PIR1	-0.2262	0.0002808	IV
YDR188W_damp349 (CCT6)	CCW12	-0.2259	0.000113	I
YKL146W_dma2864_DMA30 (AVT3)	FIT2	-0.2259	0.01349	III
YPR049C_sn416 (ATG11)	FIT2	-0.2257	0.001862	III
YER078C_sn2623 (ICP55)	CWP1	-0.2256	0.0004403	IV
YER078C_sn2623 (ICP55)	CWP2	-0.2256	0.0004403	IV
YMR116C_dma3698_DMA30 (ASC1)	DAN1	-0.2255	0	IV
YNL098C_dma4019_DMA30 (RAS2)	SAG1	-0.2255	0.01464	VII
YKR018C_sn3606	ECM33	-0.2252	0.002234	VI
YJR080C_sn2513 (AIM24)	DSE2	-0.2251	0.01377	V
YLR055C_sn1817 (SPT8)	FIT1	-0.2251	1.46e-06	III
YDR212W_tsa782_TSA26 (TCP1)	CCW12	-0.2249	6.81e-06	I
YFL039C_tsa140_TSA26 (ACT1)	SRL1	-0.2246	3.95e-09	II
YMR003W_dma3615_DMA30 (AIM34)	FLO11	-0.2245	0.0002066	II
YFL039C_tsq1093 (ACT1)	DAN1	-0.2244	0.03628	IV
YLR416C_dma3478_DMA30	FIT1	-0.2244	0.001637	III
YDR046C_dma5219_DMA30 (BAP3)	CIS3	-0.2243	0.003382	III
YDL058W_tsq441 (USO1)	ECM33	-0.2243	1.83e-05	VI
YIL065C_dma2325_DMA30 (FIS1)	TIR2	-0.2243	0.03134	IV
YLL002W_dma3033_DMA30 (RTT109)	CIS3	-0.2242	0.0003643	III
YPL211W_tsa114_TSA26 (NIP7)	HSP150	-0.2242	3.67e-07	IV
YKL196C_tsa1089_TSA26	SUN4	-0.2241	0.004488	V
YER155C_sn766 (BEM2)	CCW12	-0.2239	1.94e-08	I
YDR055W_dma842_DMA30 (PST1)	CWP1	-0.2239	0.006527	IV
YDR055W_dma842_DMA30 (PST1)	CWP2	-0.2239	0.006527	IV
YDR074W_dma887_DMA30 (TPS2)	FLO10	-0.2239	0.0001005	III
YKL096W-A_sn767 (CWP2)	PST1	-0.2239	0.006527	III
YGR121C_sn2338 (MEP1)	ECM33	-0.2232	5.63e-07	VI
YGL196W_dma1721_DMA30 (DSD1)	SPS2	-0.2232	0.001656	IV
YNR051C_dma4271_DMA30 (BRE5)	TIR4	-0.2232	9.72e-05	IV
YML077W_damp821 (BET5)	CCW12	-0.2231	2.49e-05	I
YJL105W_sn1692 (SET4)	PST1	-0.223	0.005168	III
YGR278W_tsq1321 (CWC22)	PIR3	-0.2228	0.0004245	IV
YGR231C_dma1987_DMA30 (PHB2)	FIT2	-0.2226	0.002681	III
YGR173W_sn3893 (RBG2)	ECM33	-0.2225	0.01344	VI
YPL041C_dma4791_DMA30 (MRX11)	SAG1	-0.2224	0.02932	VII
YDR127W_dma916_DMA30 (ARO1)	DAN1	-0.2222	0.004548	IV
YGL033W_sn1639 (HOP2)	FLO10	-0.2221	0.005708	III
YBR200W_sn817 (BEM1)	SRL1	-0.2221	4.44e-13	II
YFL039C_tsa220_TSA26 (ACT1)	CCW12	-0.222	2.81e-05	I
YBR288C_dma450_DMA30 (APM3)	SPS2	-0.2219	0.0001341	IV
YML115C_sn861 (VAN1)	CWP1	-0.2217	1.11e-12	IV
YML115C_sn861 (VAN1)	CWP2	-0.2217	1.11e-12	IV
YER022W_damp28 (SRB4)	CCW12	-0.2215	3.43e-18	I
YDR158W_dma938_DMA30 (HOM2)	SUN4	-0.2215	0.002064	V
YFL039C_tsq77 (ACT1)	ECM33	-0.2214	0.002032	VI
YDR245W_sn566 (MNN10)	ECM33	-0.2212	7.8e-23	VI
YOR314W_dma4727_DMA30	FLO10	-0.2211	0.01959	III
YNL138W_tsq675 (SRV2)	SRL1	-0.2211	2.41e-24	II
YHR081W_dma2126_DMA30 (LRP1)	FIT2	-0.221	0.02744	III
YIL055C_sn3237	DAN1	-0.2208	0.006708	IV
YDL082W_dma680_DMA30 (RPL13A)	FLO10	-0.2203	9.17e-05	III
YCR034W_dma556_DMA30 (ELO2)	FLO11	-0.2201	0.002648	II
YHR041C_dma2104_DMA30 (SRB2)	SPS22	-0.22	1.43e-05	IV
YGR229C_sn756 (SMI1)	CCW12	-0.2199	7.4e-12	I
YIR023W_dma2435_DMA30 (DAL81)	SED1	-0.2196	0.0004887	IV
YEL032W_tsq1075 (MCM3)	SUN4	-0.2193	5.64e-10	V
YLL040C_dma3055_DMA30 (VPS13)	SUN4	-0.2193	0.007013	V
YJR138W_sn1098 (IML1)	HSP150	-0.2191	3.88e-19	IV
YNR067C_dma4281_DMA30 (DSE4)	FIT2	-0.219	0.01378	III
YDR424C_dma1174_DMA30 (DYN2)	FIT3	-0.219	0.01735	IV
YJL106W_sn1533 (IME2)	TIR4	-0.219	0.006441	IV
YLR314C_tsq130 (CDC3)	ECM33	-0.2187	0.003315	VI
YBR109C_tsq154 (CMD1)	FIG2	-0.2185	1.69e-15	III
YER143W_dma1452_DMA30 (DDI1)	FIT2	-0.2185	0.00407	III
YBR170C_dma336_DMA30 (NPL4)	SUN4	-0.2185	0.03293	V
YBL067C_sn1167 (UBP13)	CWP1	-0.2183	0.00589	IV
YBL067C_sn1167 (UBP13)	CWP2	-0.2183	0.00589	IV
YNL138W_tsa675_TSA26 (SRV2)	SRL1	-0.2181	1.32e-16	II
YLR131C_sn1346 (ACE2)	FIT1	-0.2178	0.003568	III
YDR388W_dma1128_DMA30 (RVS167)	HSP150	-0.2176	1.7e-08	IV
YLL036C_tsa247_TSA26 (PRP19)	PIR3	-0.2176	3.23e-06	IV
YGR156W_tsq835 (PTI1)	CWP1	-0.2175	0.001006	IV
YGR156W_tsq835 (PTI1)	CWP2	-0.2175	0.001006	IV
YER172C_tsq1863 (BRR2)	CCW12	-0.2174	0.002842	I
YGR157W_dma1899_DMA30 (CHO2)	SUN4	-0.2173	0.004181	V
YMR154C_dma3750_DMA30 (RIM13)	FLO11	-0.2171	3.09e-09	II
YDL220C_tsq881 (CDC13)	SPI1	-0.2167	0.0002376	III
YBL046W_dma127_DMA30 (PSY4)	SPS2	-0.2167	0.005607	IV
YJR076C_tsq1070 (CDC11)	ECM33	-0.2166	9.84e-05	VI
YHR107C_tsa50_TSA26 (CDC12)	SUN4	-0.2164	0.02436	V
YLR365W_dma3404_DMA30	FIT2	-0.2163	0.00169	III
YER077C_sn2555 (MRX1)	SPS2	-0.2162	2.07e-26	IV
YNL099C_dma4018_DMA30 (OCA1)	CIS3	-0.2161	8.44e-06	III
YCR075C_sn2207 (ERS1)	ECM33	-0.2161	0.0007354	VI
YDL039C_dma647_DMA30 (PRM7)	CWP1	-0.2158	0.004506	IV
YDL039C_dma647_DMA30 (PRM7)	CWP2	-0.2158	0.004506	IV
YDR208W_tsq129 (MSS4)	CCW12	-0.2155	5.33e-05	I
YIR006C_tsa353_TSA26 (PAN1)	CCW12	-0.2155	0.0006825	I
YJR065C_tsq1203 (ARP3)	ECM33	-0.2155	0.01226	VI
YLL031C_tsq1220 (GPI13)	FIG2	-0.2154	1.33e-15	III
YMR279C_dma3881_DMA30	SPS2	-0.2154	0.008787	IV
YJR060W_dma2646_DMA30 (CBF1)	SUN4	-0.2152	0.003571	V
YDR068W_dma856_DMA30 (DOS2)	SUN4	-0.215	0.01011	V
YOL088C_dma4379_DMA30 (MPD2)	HSP150	-0.2141	0.03363	IV
YDR394W_tsq785 (RPT3)	ECM33	-0.2139	0.0001837	VI
YOR114W_dma4547_DMA30	PST1	-0.2139	0.01936	III
YBR160W_tsa150_TSA26 (CDC28)	SRL1	-0.2134	0.007795	II
YLR312C_dma3338_DMA30 (ATG39)	SUN4	-0.2133	0.005212	V
YMR011W_dma3631_DMA30 (HXT2)	FIT2	-0.2131	8.31e-05	III
YPL212C_dma4956_DMA30 (PUS1)	SED1	-0.2128	0.0002968	IV
YOR140W_dma4551_DMA30 (SFL1)	CIS3	-0.2126	2.94e-05	III
YDL013W_dma616_DMA30 (SLX5)	FIT2	-0.2126	0.004792	III
YHL020C_dma2042_DMA30 (OPI1)	CIS3	-0.2122	0.00016	III
YFR004W_damp39 (RPN11)	CCW12	-0.2121	0.001141	I
YGL247W_tsq1455 (BRR6)	ECM33	-0.2119	0.0006983	VI
YOR216C_sn193 (RUD3)	ECM33	-0.2119	0.0002666	VI
YAR029W_dma82_DMA30	TIR2	-0.2115	0.0304	IV
YPL115C_dma4853_DMA30 (BEM3)	FLO10	-0.2113	0.004035	III
YCR052W_tsq1433 (RSC6)	SPI1	-0.2109	0.01169	III
YGL023C_sn535 (PIB2)	FIT1	-0.2105	0.0005159	III
YLR440C_tsa1214_TSA26 (SEC39)	SUN4	-0.2104	0.01112	V
YLR218C_dma3287_DMA30 (COA4)	SPS2	-0.2102	3.27e-07	IV
YMR063W_dma3661_DMA30 (RIM9)	FLO11	-0.2099	0.0001622	II
YGL066W_dma1654_DMA30 (SGF73)	SPS22	-0.2099	0.01509	IV
YFL039C_tsq223 (ACT1)	ECM33	-0.2098	3.12e-112	VI
YPL068C_dma4818_DMA30	DSE2	-0.2095	4.38e-20	V
YCL063W_dma520_DMA30 (VAC17)	FIT2	-0.2095	1e-05	III
YPL009C_sn3520 (RQC2)	DAN1	-0.2094	0.007143	IV
YLL010C_dma3028_DMA30 (PSR1)	DSE2	-0.2094	6.95e-144	V
YFL039C_tsa910_TSA26 (ACT1)	CCW12	-0.2093	0.00143	I
YPR191W_dma5152_DMA30 (QCR2)	TIR4	-0.2093	7.69e-05	IV
YLR341W_dma3378_DMA30 (SPO77)	SPS2	-0.2092	0.002556	IV
YKR061W_dma2999_DMA30 (KTR2)	FIT2	-0.2091	0.017	III
YMR120C_dma3718_DMA30 (ADE17)	SED1	-0.209	0.0005259	IV
YDR276C_sn2346 (PMP3)	CCW12	-0.2089	1.1e-89	I
YGL022W_tsa790_TSA26 (STT3)	CWP1	-0.2089	0.01369	IV
YGR277C_tsq1408 (CAB4)	FIG2	-0.2089	8.97e-07	III
YPR194C_dma5172_DMA30 (OPT2)	TIR2	-0.2089	0.01702	IV
YKL212W_dma2911_DMA30 (SAC1)	DSE2	-0.2088	0	V
YDR044W_tsq1305 (HEM13)	SPS22	-0.2088	5.84e-07	IV
YCR037C_dma554_DMA30 (PHO87)	SUN4	-0.2088	0.003422	V
YMR049C_tsq1331 (ERB1)	SPS2	-0.2087	6.9e-06	IV
YJR103W_dma2710_DMA30 (URA8)	FIT1	-0.2081	0.01853	III
YCR051W_dma570_DMA30	FIT2	-0.2076	0.005311	III
YIL146C_dma2365_DMA30 (ATG32)	FLO10	-0.2072	2.75e-05	III
YDL103C_tsq860 (QRI1)	TIP1	-0.2065	2.38e-38	III
YPL057C_sn2989 (SUR1)	ECM33	-0.2063	0.000266	VI
YMR182C_sn1875 (RGM1)	DSE2	-0.2061	0.01704	V
YLR314C_tsq885 (CDC3)	ECM33	-0.2061	0.04921	VI
YDR388W_sn171 (RVS167)	FIG2	-0.2061	4.83e-17	III
YCR094W_sn1606 (CDC50)	SPS2	-0.2061	0.0001732	IV
YNL138W_tsq1176 (SRV2)	CCW12	-0.2058	1.52e-16	I
YDL225W_sn823 (SHS1)	SPI1	-0.2058	7.04e-05	III
YBR283C_dma455_DMA30 (SSH1)	CWP1	-0.2051	0.007021	IV
YBR283C_dma455_DMA30 (SSH1)	CWP2	-0.2051	0.007021	IV
YOR185C_sn1905 (GSP2)	FLO10	-0.2051	0.006437	III
YGR203W_dma1962_DMA30	FLO10	-0.2049	0.02169	III
YFL039C_tsa72_TSA26 (ACT1)	CCW12	-0.2048	3.28e-05	I
YJR064W_tsa1254_TSA26 (CCT5)	CCW12	-0.2048	0.000283	I
YOR380W_sn2046 (RDR1)	DSE2	-0.2048	0.0291	V
YKL073W_sn363 (LHS1)	SED1	-0.2044	2.21e-19	IV
YJR149W_sn3469	SPS2	-0.2043	0.001195	IV
YNL181W_tsq2245	CIS3	-0.2042	0.01851	III
YPR153W_dma5148_DMA30	DSE2	-0.2041	0.006154	V
YPL159C_dma4907_DMA30 (PET20)	FLO10	-0.2041	0.02586	III
YGL235W_sn3200	CWP1	-0.204	1.24e-20	IV
YGL235W_sn3200	CWP2	-0.204	1.24e-20	IV
YPR114W_sn102	DAN1	-0.2037	0.003121	IV
YCR009C_dma532_DMA30 (RVS161)	TIR4	-0.2037	1.81e-16	IV
YHR039C_dma2105_DMA30 (MSC7)	FIT2	-0.2032	0.0363	III
YJR065C_tsa341_TSA26 (ARP3)	HSP150	-0.2031	1.56e-12	IV
YJL079C_dma5163_DMA30 (PRY1)	DSE2	-0.2029	0.0006319	V
YDR077W_sn734 (SED1)	CCW12	-0.2028	1.72e-08	I
YPL032C_dma4798_DMA30 (SVL3)	DSE2	-0.2028	6.88e-07	V
YPL213W_dma4955_DMA30 (LEA1)	DSE2	-0.2028	0.0009208	V
YLR110C_dma3198_DMA30 (CCW12)	SED1	-0.2028	1.72e-08	IV
YPR155C_dma5146_DMA30 (NCA2)	SED1	-0.2027	0.003356	IV
YML032C_dma3531_DMA30 (RAD52)	FIT2	-0.2026	0.03809	III
YLR319C_sn568 (BUD6)	HSP150	-0.2021	0.0009521	IV
YKL113C_dma2839_DMA30 (RAD27)	CCW14	-0.2015	0.01228	II
YOR304C-A_dma4701_DMA30 (BIL1)	SED1	-0.2015	0.007522	IV
YOR366W_dma5345_DMA30	SED1	-0.2005	0.001053	IV
YBR009C_dma188_DMA30 (HHF1)	SAG1	-0.2004	0.006954	VII
YPL023C_dma4781_DMA30 (MET12)	SUN4	-0.2003	0.01891	V
YBR257W_damp245 (POP4)	SPI1	-0.2002	0.003569	III
YOR063W_tsq2307 (RPL3)	FIT1	-0.2	0.002204	III
YNL120C_dma4029_DMA30	SAG1	-0.1999	0.01912	VII
YBR269C_dma421_DMA30 (SDH8)	CWP1	-0.1996	0.002472	IV
YBR269C_dma421_DMA30 (SDH8)	CWP2	-0.1996	0.002472	IV
YPL155C_dma4874_DMA30 (KIP2)	SUN4	-0.1996	0.01042	V
YJR076C_tsa84_TSA26 (CDC11)	PIR3	-0.1994	0.03452	IV
YPR074C_dma5065_DMA30 (TKL1)	SUN4	-0.1994	0.02653	V
YBR145W_dma309_DMA30 (ADH5)	CIS3	-0.1993	5.1e-109	III
YBL059W_sn2543	DSE2	-0.1992	0.014	V
YFL013C_sn1766 (IES1)	PIR1	-0.1992	0.002514	IV
YOL008W_dma4291_DMA30 (COQ10)	FLO10	-0.199	0.01409	III
YER157W_tsq1064 (COG3)	ECM33	-0.1988	0.00386	VI
YOL056W_sn2849 (GPM3)	DSE2	-0.1982	0.03021	V
YDL185W_sn489 (VMA1)	FIG2	-0.1978	4.33e-07	III
YJR137C_sn771 (MET5)	FIT1	-0.1977	0.006268	III
YIL062C_tsa888_TSA26 (ARC15)	HSP150	-0.1977	6.3e-05	IV
YDR465C_dma1198_DMA30 (RMT2)	FIT2	-0.1973	0.0005479	III
YFL039C_tsq142 (ACT1)	HSP150	-0.1972	0.002156	IV
YDL024C_dma634_DMA30 (DIA3)	SAG1	-0.197	0.0007548	VII
YDR253C_dma1019_DMA30 (MET32)	CWP1	-0.1969	0.009372	IV
YDR253C_dma1019_DMA30 (MET32)	CWP2	-0.1969	0.009372	IV
YNL022C_dma3960_DMA30 (RCM1)	PST1	-0.1966	0.02193	III
YPL085W_tsq119 (SEC16)	CWP1	-0.1965	5.83e-07	IV
YPL085W_tsq119 (SEC16)	CWP2	-0.1965	5.83e-07	IV
YOL017W_sn1198 (ESC8)	SPS2	-0.1964	0.009083	IV
YBR036C_sn2202 (CSG2)	TIR4	-0.1964	0.0001718	IV
YLR254C_sn1142 (NDL1)	FIT1	-0.1963	0.00658	III
YBR183W_dma348_DMA30	CWP1	-0.1961	0.01669	IV
YBR183W_dma348_DMA30	CWP2	-0.1961	0.01669	IV
YHR161C_dma2219_DMA30	SUN4	-0.1961	0.006423	V
YOL097C_damp944 (WRS1)	ECM33	-0.1959	8.7e-08	VI
YDL226C_dma810_DMA30 (GCS1)	SUN4	-0.1958	0.03097	V
YJL089W_dma2507_DMA30 (SIP4)	TIR2	-0.1958	0.03434	IV
YJL117W_dma5181_DMA30 (PHO86)	FLO10	-0.1955	0.03283	III
YHR021W-A_dma2094_DMA30 (ECM12)	FIT2	-0.1953	0.03822	III
YOR359W_dma4743_DMA30 (VTS1)	CIS3	-0.1952	0.01072	III
YPL144W_dma4881_DMA30 (POC4)	DSE2	-0.1949	0.01013	V
YIR016W_sn3246	FIT2	-0.1947	0.009686	III
YCR052W_tsq1433 (RSC6)	SPS2	-0.1947	0.02833	IV
YFR048W_dma1573_DMA30 (RMD8)	SUN4	-0.1947	0.005016	V
YDR307W_sn76 (PMT7)	ECM33	-0.1944	0.005432	VI
YML088W_sn1673 (UFO1)	SUN4	-0.1944	0.0001526	V
YPR076W_dma5086_DMA30	SUN4	-0.1944	0.01887	V
YHR101C_tsa1129_TSA26 (BIG1)	CCW12	-0.1943	0.02482	I
YLL006W_dma3031_DMA30 (MMM1)	DAN1	-0.1943	0.01699	IV
YHR012W_dma2078_DMA30 (VPS29)	FLO10	-0.1941	0.0173	III
YHL047C_dma2085_DMA30 (ARN2)	SED1	-0.1941	0.0313	IV
YPL122C_tsq2381 (TFB2)	DSE2	-0.1936	0.002383	V
YML115C_sn861 (VAN1)	SED1	-0.1936	2.8e-11	IV
YHR150W_dma2194_DMA30 (PEX28)	SED1	-0.1935	0.0003273	IV
YLR190W_dma3259_DMA30 (MMR1)	FLO11	-0.1934	0.005274	II
YGR202C_sn889 (PCT1)	DAN1	-0.1933	0.002938	IV
YJL078C_sn616 (PRY3)	FLO1	-0.1933	0.02162	III
YMR145C_dma3756_DMA30 (NDE1)	SAG1	-0.1931	0.0243	VII
YPR133C_tsq1013 (SPN1)	FLO1	-0.1927	0.006709	III
YDR021W_tsa728_TSA26 (FAL1)	SUN4	-0.1927	0.003937	V
YNL038W_tsq1351 (GPI15)	FIG2	-0.1926	7.62e-21	III
YKL161C_dma2876_DMA30 (KDX1)	SUN4	-0.1926	0.04633	V
YOR085W_sn2941 (OST3)	SED1	-0.1925	0.001601	IV
YDR242W_dma5249_DMA30 (AMD2)	SUN4	-0.1924	0.006257	V
YDL102W_tsq17 (POL3)	DAN1	-0.1923	8.94e-20	IV
YDR401W_dma1120_DMA30	DSE2	-0.1922	0.01869	V
YPL079W_dma4835_DMA30 (RPL21B)	FLO10	-0.1922	0.02364	III
YOR242C_dma4651_DMA30 (SSP2)	FIT2	-0.1921	0.004456	III
YNL022C_dma3960_DMA30 (RCM1)	SED1	-0.1921	0.00435	IV
YPR172W_sn3661	SPS2	-0.1921	0.001768	IV
YPR198W_dma5168_DMA30 (SGE1)	TIR2	-0.1921	0.004822	IV
YJL159W_sn731 (HSP150)	CCW12	-0.192	3.21e-05	I
YLR110C_dma3198_DMA30 (CCW12)	HSP150	-0.192	3.21e-05	IV
YOR336W_tsq139 (KRE5)	CCW12	-0.1919	1.34e-21	I
YDR306C_dma1066_DMA30	CWP1	-0.1919	0.02548	IV
YDR306C_dma1066_DMA30	CWP2	-0.1919	0.02548	IV
YBL105C_tsq539 (PKC1)	HSP150	-0.1919	0.0001996	IV
YFL039C_tsa74_TSA26 (ACT1)	CCW12	-0.1918	0.01157	I
YHR189W_dma2229_DMA30 (PTH1)	SED1	-0.1918	0.02927	IV
YGR183C_sn2484 (QCR9)	CWP1	-0.1914	4.37e-07	IV
YGR183C_sn2484 (QCR9)	CWP2	-0.1914	4.37e-07	IV
YOL023W_sn4207 (IFM1)	FIT2	-0.1914	1.18e-14	III
YFL039C_tsq1257 (ACT1)	CCW12	-0.1913	5.46e-06	I
YDR281C_sn2780 (PHM6)	CWP1	-0.1911	0.01383	IV
YDR281C_sn2780 (PHM6)	CWP2	-0.1911	0.01383	IV
YPR066W_dma5071_DMA30 (UBA3)	FLO11	-0.191	0.003679	II
YPR138C_dma5135_DMA30 (MEP3)	SED1	-0.1909	0.01082	IV
YKR042W_dma2959_DMA30 (UTH1)	SUN4	-0.1909	0.03068	V
YML112W_sn1951 (CTK3)	DAN1	-0.1908	0.02271	IV
YHR160C_sn377 (PEX18)	FIT1	-0.1907	0.004388	III
YLR084C_dma3158_DMA30 (RAX2)	FIT2	-0.1906	0.026	III
YBL007C_dma91_DMA30 (SLA1)	HSP150	-0.1902	2.05e-16	IV
YGL116W_tsq1197 (CDC20)	ECM33	-0.1901	0.0001917	VI
YOR321W_dma4721_DMA30 (PMT3)	CIS3	-0.19	0.0002579	III
YPL266W_tsq986 (DIM1)	PST1	-0.1897	9.59e-06	III
YAR014C_sn784 (BUD14)	FLO10	-0.1896	0.009321	III
YDR424C_dma1174_DMA30 (DYN2)	SUN4	-0.1895	0.02371	V
YGR156W_tsq835 (PTI1)	FLO1	-0.1894	0.0202	III
YIL027C_sn66 (EMC5)	TIR4	-0.1894	0.01366	IV
YDR437W_tsa1014_TSA26 (GPI19)	SRL1	-0.1893	3.81e-103	II
YBL015W_dma85_DMA30 (ACH1)	SUN4	-0.1892	0.01495	V
YMR033W_tsq495 (ARP9)	PST1	-0.1891	0.01697	III
YBR216C_sn3860	CWP1	-0.189	0.02411	IV
YBR216C_sn3860	CWP2	-0.189	0.02411	IV
YLR141W_tsq2096 (RRN5)	DSE2	-0.189	0.03097	V
YHR107C_tsq33 (CDC12)	ECM33	-0.189	0.002095	VI
YFL039C_tsq142 (ACT1)	CCW12	-0.1887	0.0005571	I
YOR301W_dma4703_DMA30 (RAX1)	FLO10	-0.1887	0.01478	III
YPR045C_dma5041_DMA30 (THP3)	SUN4	-0.1886	0.01744	V
YDL118W_dma704_DMA30	FIT2	-0.1885	0.0001286	III
YLL001W_dma3034_DMA30 (DNM1)	TIR4	-0.1884	0.004643	IV
YIL160C_dma2378_DMA30 (POT1)	CIS3	-0.1881	0.0165	III
YLL045C_dma3050_DMA30 (RPL8B)	SPS2	-0.1881	0.03038	IV
YGL036W_dma1611_DMA30	FIT2	-0.188	0.04518	III
YNL111C_dma5340_DMA30 (CYB5)	SAG1	-0.188	0.008078	VII
YJL173C_tsq1145 (RFA3)	DAN1	-0.1878	0.03401	IV
YBR007C_dma190_DMA30 (DSF2)	FLO10	-0.1878	0.01221	III
YIL062C_tsq888 (ARC15)	CCW12	-0.1877	0.001232	I
YOR327C_dma4718_DMA30 (SNC2)	DSE2	-0.1877	0.006941	V
YJR087W_dma2654_DMA30	FLO10	-0.1877	5.87e-150	III
YKL006W_dma2739_DMA30 (RPL14A)	SPS2	-0.1877	5.54e-36	IV
YFR032C_dma1564_DMA30 (RRT5)	CWP1	-0.1876	0.0009385	IV
YFR032C_dma1564_DMA30 (RRT5)	CWP2	-0.1876	0.0009385	IV
YOR259C_tsq1263 (RPT4)	ECM33	-0.1876	7.3e-20	VI
YBR225W_dma406_DMA30	FIT1	-0.1876	0.01602	III
YPL085W_tsq119 (SEC16)	ECM33	-0.1874	3.19e-05	VI
YGL101W_dma1662_DMA30	FIT2	-0.1873	0.0002863	III
YCR009C_dma532_DMA30 (RVS161)	SPS22	-0.1873	5.72e-29	IV
YCL074W_sn3880	TIP1	-0.1873	0.009427	III
YJL010C_tsq2044 (NOP9)	DSE2	-0.1872	0.04167	V
YJR148W_dma2747_DMA30 (BAT2)	SUN4	-0.1872	0.03646	V
YGL173C_dma1708_DMA30 (XRN1)	CCW14	-0.1871	0.01585	II
YOR139C_dma4552_DMA30	FIG2	-0.1868	5e-07	III
YIL074C_dma2318_DMA30 (SER33)	FIT2	-0.1867	0.001928	III
YDR162C_sn990 (NBP2)	CCW12	-0.1866	0.0002199	I
YKL017C_sn1364 (HCS1)	ECM33	-0.1865	0.01358	VI
YJL198W_dma2571_DMA30 (PHO90)	DAN1	-0.1863	0.01822	IV
YNL232W_tsq1379 (CSL4)	ECM33	-0.186	0.009941	VI
YML063W_dma3588_DMA30 (RPS1B)	FIT2	-0.186	0.004326	III
YBL105C_tsq538 (PKC1)	CCW14	-0.1859	0.001262	II
YPL112C_dma4856_DMA30 (PEX25)	TIR2	-0.1859	0.005582	IV
YOR281C_tsq2354 (PLP2)	SED1	-0.1858	0.001771	IV
YDL182W_dma748_DMA30 (LYS20)	CWP1	-0.1857	0.008466	IV
YDL182W_dma748_DMA30 (LYS20)	CWP2	-0.1857	0.008466	IV
YER167W_dma1459_DMA30 (BCK2)	CIS3	-0.1856	0.0005325	III
YLR178C_sn4157 (TFS1)	HSP150	-0.1856	0.0001597	IV
YPL214C_dma4954_DMA30 (THI6)	PST1	-0.1856	0.004065	III
YNL091W_dma4002_DMA30 (NST1)	CCW14	-0.1855	0.01535	II
YIL003W_tsq1992 (CFD1)	FIG2	-0.1855	0.002334	III
YDR246W_tsa1220_TSA26 (TRS23)	CCW12	-0.1854	0.003926	I
YDR137W_sn254 (RGP1)	CCW12	-0.1853	2.25e-07	I
YJL187C_sn1353 (SWE1)	CCW12	-0.1852	0.005686	I
YFL039C_tsa140_TSA26 (ACT1)	CCW12	-0.1852	0.004514	I
YLL053C_sn3284	FLO1	-0.1851	0.03476	III
YIR016W_sn3246	SPS22	-0.1851	0.005093	IV
YCR009C_dma532_DMA30 (RVS161)	TIR2	-0.1851	0.0155	IV
YDR146C_dma927_DMA30 (SWI5)	CCW14	-0.185	7.88e-23	II
YJR075W_sn702 (HOC1)	CCW12	-0.1849	0.0008797	I
YPR108W_damp1073 (RPN7)	CCW12	-0.1848	0.00134	I
YGL063W_sn4223 (PUS2)	CWP1	-0.1848	0.01389	IV
YGL063W_sn4223 (PUS2)	CWP2	-0.1848	0.01389	IV
YKL157W_dma2880_DMA30 (APE2)	SED1	-0.1846	0.04374	IV
YFL009W_tsa334_TSA26 (CDC4)	SRL1	-0.1845	2.95e-05	II
YDL061C_dma657_DMA30 (RPS29B)	SPS2	-0.1844	0.00328	IV
YOR360C_dma4742_DMA30 (PDE2)	SPS22	-0.1844	2.73e-07	IV
YGR253C_damp544 (PUP2)	CCW12	-0.1843	7.03e-06	I
YKL196C_tsq1318	FIT1	-0.1843	0.01977	III
YKL166C_sn945 (TPK3)	FLO1	-0.1843	0.02177	III
YFL039C_tsa142_TSA26 (ACT1)	HSP150	-0.1843	6.73e-06	IV
YLR363C_dma3406_DMA30 (NMD4)	SAG1	-0.1842	0.006383	VII
YFL034C-B_tsq1216 (MOB2)	DSE2	-0.1841	0.008009	V
YJL053W_sn370 (PEP8)	FIG2	-0.1841	1.15e-05	III
YDR006C_dma836_DMA30 (SOK1)	SAG1	-0.1841	0.03526	VII
YBR254C_tsa1174_TSA26 (TRS20)	SRL1	-0.1841	3.32e-08	II
YPL136W_dma4864_DMA30	SAG1	-0.184	0.003283	VII
YDL197C_dma782_DMA30 (ASF2)	SUN4	-0.184	0.0133	V
YMR291W_dma3897_DMA30 (TDA1)	CCW14	-0.1839	0.0009739	II
YBR171W_sn320 (SEC66)	FIG2	-0.1838	1.56e-06	III
YBR067C_dma232_DMA30 (TIP1)	SAG1	-0.1837	0.007734	VII
YJR004C_sn591 (SAG1)	TIP1	-0.1837	0.007734	III
YDR225W_dma988_DMA30 (HTA1)	SAG1	-0.1836	0.006758	VII
YIL122W_dma5311_DMA30 (POG1)	SAG1	-0.1835	0.02274	VII
YJL078C_sn616 (PRY3)	CCW12	-0.1833	5.98e-13	I
YBR147W_dma307_DMA30 (RTC2)	CWP1	-0.1833	0.03726	IV
YBR147W_dma307_DMA30 (RTC2)	CWP2	-0.1833	0.03726	IV
YMR307W_dma3905_DMA30 (GAS1)	HSP150	-0.1833	0.000697	IV
YOR246C_sn3790 (ENV9)	TIR4	-0.1833	0.02458	IV
YOR157C_damp976 (PUP1)	CCW12	-0.1832	0.009522	I
YIL042C_dma2273_DMA30 (PKP1)	FIT2	-0.1832	0.02425	III
YBR023C_sn1236 (CHS3)	HSP150	-0.1831	0.0002153	IV
YIL129C_tsq2031 (TAO3)	FIT1	-0.183	0.01483	III
YLR393W_dma3426_DMA30 (ATP10)	PST1	-0.1829	0.03612	III
YGL198W_dma1719_DMA30	SAG1	-0.1829	0.01128	VII
YPR043W_dma5043_DMA30 (RPL43A)	SPS2	-0.1829	0.008902	IV
YER178W_dma1475_DMA30 (PDA1)	FLO10	-0.1828	0.001188	III
YCL066W_sn4494 (HMLALPHA1)	TIR2	-0.1828	0.003128	IV
YPL161C_dma4906_DMA30 (BEM4)	DAN1	-0.1825	0.007572	IV
YDR074W_dma887_DMA30 (TPS2)	SUN4	-0.1825	0.01346	V
YDR510W_tsa928_TSA26 (SMT3)	SUN4	-0.1824	0.002534	V
YPL184C_sn3527 (MRN1)	TIP1	-0.1824	0.0043	III
YKL160W_dma2877_DMA30 (ELF1)	FLO10	-0.1823	0.003068	III
YGR141W_dma1887_DMA30 (VPS62)	CWP1	-0.1822	0.001626	IV
YGR141W_dma1887_DMA30 (VPS62)	CWP2	-0.1822	0.001626	IV
YPL036W_dma4795_DMA30 (PMA2)	TIR3	-0.1822	0.0311	II
YDR392W_sn2072 (SPT3)	TIR4	-0.1822	0.001822	IV
YDR294C_sn2995 (DPL1)	DSE2	-0.1821	0.04263	V
YDR105C_sn3682 (TMS1)	SPS2	-0.182	0.005395	IV
YDR212W_tsa448_TSA26 (TCP1)	SRL1	-0.182	0.0005989	II
YDR419W_dma1133_DMA30 (RAD30)	SAG1	-0.1819	0.01677	VII
YDL193W_tsq1405 (NUS1)	ECM33	-0.1817	0.001875	VI
YIL064W_dma2326_DMA30 (EFM4)	FIT1	-0.1816	0.0179	III
YOR066W_dma4480_DMA30 (MSA1)	CIS3	-0.1815	2.71e-05	III
YEL012W_sn1564 (UBC8)	CCW12	-0.181	0.01457	I
YDR074W_dma887_DMA30 (TPS2)	CIS3	-0.181	1.96e-48	III
YNL118C_tsa754_TSA26 (DCP2)	FLO11	-0.1809	0.01301	II
YMR290C_tsa1161_TSA26 (HAS1)	PIR3	-0.1809	0.006802	IV
YNL051W_dma3963_DMA30 (COG5)	FIT2	-0.1808	0.007428	III
YJR076C_tsa84_TSA26 (CDC11)	SUN4	-0.1808	6.57e-06	V
YGR131W_dma1896_DMA30 (FHN1)	SUN4	-0.1807	0.000991	V
YPL158C_dma5360_DMA30 (AIM44)	DAN1	-0.1804	0.01019	IV
YKL092C_dma2832_DMA30 (BUD2)	SUN4	-0.1804	2.3e-20	V
YLR459W_tsq200 (GAB1)	FIG2	-0.1803	1e-06	III
YPL267W_dma5010_DMA30 (ACM1)	DSE2	-0.1801	0.003174	V
YML115C_sn861 (VAN1)	ECM33	-0.1801	1.81e-07	VI
YCR053W_dma569_DMA30 (THR4)	FLO11	-0.1799	4.65e-46	II
YML130C_tsq203 (ERO1)	SED1	-0.1799	2.67e-05	IV
YDR164C_tsa36_TSA26 (SEC1)	SUN4	-0.1799	8.38e-33	V
YIL140W_sn684 (AXL2)	TIR4	-0.1798	0.01059	IV
YPR079W_dma5083_DMA30 (MRL1)	SAG1	-0.1797	0.01911	VII
YPL172C_sn2701 (COX10)	CWP1	-0.1796	0.002934	IV
YPL172C_sn2701 (COX10)	CWP2	-0.1796	0.002934	IV
YMR235C_tsa118_TSA26 (RNA1)	PIR3	-0.1796	0.01735	IV
YOR329C_damp1010 (SCD5)	CCW12	-0.1795	0.000449	I
YCL013W_dma475_DMA30	CWP1	-0.1794	0.01385	IV
YCL013W_dma475_DMA30	CWP2	-0.1794	0.01385	IV
YOL123W_tsa858_TSA26 (HRP1)	HSP150	-0.1793	0.005704	IV
YKL040C_dma2764_DMA30 (NFU1)	SAG1	-0.1793	0.02111	VII
YLL048C_dma3093_DMA30	FLO11	-0.1787	7.55e-06	II
YDL150W_tsq1741 (RPC53)	ECM33	-0.1786	0.005664	VI
YKL002W_sn367 (DID4)	CCW12	-0.1785	2.01e-05	I
YGL151W_dma1703_DMA30 (NUT1)	CCW14	-0.1785	0.003664	II
YAR066W_sn3095	DAN1	-0.1783	0.001585	IV
YGR157W_dma1899_DMA30 (CHO2)	CWP1	-0.1782	0.0004294	IV
YGR157W_dma1899_DMA30 (CHO2)	CWP2	-0.1782	0.0004294	IV
YMR321C_sn3342	PIR3	-0.1782	0.0193	IV
YDL008W_tsa783_TSA26 (APC11)	HSP150	-0.1781	0.003809	IV
YPL244C_dma4959_DMA30 (HUT1)	DSE2	-0.178	0.001176	V
YBR231C_dma400_DMA30 (SWC5)	CWP1	-0.1779	0.02753	IV
YBR231C_dma400_DMA30 (SWC5)	CWP2	-0.1779	0.02753	IV
YER134C_sn3580	PIR3	-0.1778	3e-05	IV
YCR075C_dma578_DMA30 (ERS1)	SUN4	-0.1778	0.0003389	V
YMR200W_tsq1332 (ROT1)	CCW12	-0.1777	0.004977	I
YGL046W_dma1629_DMA30	SUN4	-0.1777	0.02904	V
YPL033C_dma4797_DMA30 (SRL4)	SED1	-0.1776	0.03009	IV
YKL213C_dma2910_DMA30 (DOA1)	SED1	-0.1775	0.02886	IV
YDR502C_dma5259_DMA30 (SAM2)	SUN4	-0.1775	0.0003752	V
YDR108W_dma909_DMA30 (TRS85)	TIR2	-0.1775	0.01857	IV
YMR197C_tsq634 (VTI1)	ECM33	-0.1773	1.76e-18	VI
YDR127W_dma916_DMA30 (ARO1)	SAG1	-0.1773	0.01515	VII
YNL181W_tsq1679	FIG2	-0.1772	1.08e-11	III
YKR042W_dma2959_DMA30 (UTH1)	SED1	-0.1772	0.03032	IV
YMR207C_sn2813 (HFA1)	SPS2	-0.177	0.0004599	IV
YOL018C_dma4304_DMA30 (TLG2)	CCW14	-0.1769	0.02771	II
YPL174C_dma4918_DMA30 (NIP100)	FIT2	-0.1768	0.001334	III
YGR260W_dma2015_DMA30 (TNA1)	PST1	-0.1768	1.23e-18	III
YLR028C_sn2472 (ADE16)	FLO1	-0.1767	0.02302	III
YPR069C_dma5069_DMA30 (SPE3)	FLO11	-0.1765	0.02504	II
YCL049C_sn3687	HSP150	-0.1765	0.006304	IV
YBR031W_sn3981 (RPL4A)	DAN1	-0.1764	0.02438	IV
YGL057C_sn2556 (GEP7)	ECM33	-0.1763	0.01748	VI
YOR155C_dma5197_DMA30 (ISN1)	FIT2	-0.1761	0.006604	III
YDR063W_sn3569 (AIM7)	SPS22	-0.176	5.04e-14	IV
YIL036W_dma2279_DMA30 (CST6)	SUN4	-0.1759	0.03794	V
YLL001W_dma3034_DMA30 (DNM1)	CCW14	-0.1757	1.09e-09	II
YBR291C_dma447_DMA30 (CTP1)	CWP1	-0.1757	0.01878	IV
YBR291C_dma447_DMA30 (CTP1)	CWP2	-0.1757	0.01878	IV
YPL233W_tsa450_TSA26 (NSL1)	SUN4	-0.1757	0.000315	V
YKR052C_sn2065 (MRS4)	CCW12	-0.1754	0.02069	I
YPL113C_sn2900	DSE2	-0.1753	0.04483	V
YDR016C_tsa1077_TSA26 (DAD1)	PIR3	-0.1753	0.01712	IV
YJL141C_sn1525	CCW12	-0.1752	0.02323	I
YDL078C_sn2811 (MDH3)	TIR4	-0.1752	7.36e-05	IV
YNL159C_sn4489 (ASI2)	CIS3	-0.1751	3.94e-05	III
YDR063W_sn3569 (AIM7)	FIT1	-0.175	0.002279	III
YHR098C_sn191 (SFB3)	SED1	-0.175	2.6e-08	IV
YPR086W_tsa832_TSA26 (SUA7)	SUN4	-0.175	0.003136	V
YNL041C_dma3970_DMA30 (COG6)	FLO11	-0.1749	4.92e-10	II
YKL019W_tsa1273_TSA26 (RAM2)	PST1	-0.1749	0.01518	III
YAR002W_dma68_DMA30 (NUP60)	SAG1	-0.1749	0.03434	VII
YNL233W_sn786 (BNI4)	CCW12	-0.1748	0.001504	I
YPR094W_tsq1051 (RDS3)	ECM33	-0.1747	0.02632	VI
YDL213C_dma796_DMA30 (NOP6)	CWP1	-0.1746	0.01571	IV
YDL213C_dma796_DMA30 (NOP6)	CWP2	-0.1746	0.01571	IV
YOL070C_sn654 (NBA1)	DSE2	-0.1743	0.0426	V
YNL232W_tsq1379 (CSL4)	DSE2	-0.1741	0.03935	V
YLL059C_dma3106_DMA30	SED1	-0.1741	0.03174	IV
YDL015C_damp267 (TSC13)	ECM33	-0.174	1.08e-06	VI
YCL010C_dma478_DMA30 (SGF29)	CCW14	-0.1739	0.02172	II
YKR083C_tsq1118 (DAD2)	CWP1	-0.1738	0.01149	IV
YKL098W_sn3270 (MTC2)	FLO10	-0.1738	0.02273	III
YHR109W_dma2157_DMA30 (CTM1)	SAG1	-0.1738	0.02742	VII
YOL044W_dma4309_DMA30 (PEX15)	CWP1	-0.1737	4.06e-12	IV
YOL044W_dma4309_DMA30 (PEX15)	CWP2	-0.1737	4.06e-12	IV
YDR245W_sn566 (MNN10)	CCW12	-0.1735	3.95e-08	I
YPR023C_dma5033_DMA30 (EAF3)	TIR4	-0.1735	0.01324	IV
YGL209W_sn2015 (MIG2)	CCW12	-0.1733	0.009581	I
YCR046C_sn4020 (IMG1)	DSE2	-0.1733	0.008992	V
YGR113W_tsq240 (DAM1)	TIR2	-0.1733	0.0001137	IV
YCR052W_tsq1433 (RSC6)	PST1	-0.1732	0.006114	III
YDR061W_dma860_DMA30	SUN4	-0.1732	0.02305	V
YDR088C_tsa657_TSA26 (SLU7)	SUN4	-0.1732	0.031	V
YKR028W_dma2949_DMA30 (SAP190)	SUN4	-0.1732	0.04074	V
YBR239C_dma418_DMA30 (ERT1)	CWP1	-0.1729	0.019	IV
YBR239C_dma418_DMA30 (ERT1)	CWP2	-0.1729	0.019	IV
YLR425W_sn763 (TUS1)	FIG2	-0.1728	7.6e-07	III
YOR200W_damp1515	CWP1	-0.1727	0.02304	IV
YBR084W_sn2684 (MIS1)	SPS2	-0.1727	0.007364	IV
YPL245W_dma4958_DMA30	SPS2	-0.1727	0.02199	IV
YGR065C_tsq1935 (VHT1)	DSE2	-0.1725	0.03924	V
YGR254W_sn2850 (ENO1)	SUN4	-0.1725	0.005854	V
YNR051C_sn339 (BRE5)	CCW12	-0.1724	2.27e-08	I
YLR090W_sn3030 (XDJ1)	FLO1	-0.1724	0.003236	III
YMR088C_dma3693_DMA30 (VBA1)	FIT2	-0.1722	0.01275	III
YBL105C_tsq538 (PKC1)	CWP1	-0.1721	0.00197	IV
YBL105C_tsq538 (PKC1)	CWP2	-0.1721	0.00197	IV
YOL004W_dma4294_DMA30 (SIN3)	CIS3	-0.1718	0.02216	III
YOR341W_tsq1125 (RPA190)	CWP1	-0.1716	1.46e-05	IV
YBL040C_tsa1072_TSA26 (ERD2)	CCW12	-0.1715	0.001685	I
YPR070W_dma5068_DMA30 (MED1)	FIG2	-0.1715	1.52e-31	III
YGR245C_tsa523_TSA26 (SDA1)	PST1	-0.1715	1.8e-05	III
YCL008C_sn411 (STP22)	SUN4	-0.1714	0.001348	V
YML020W_sn3316	TIP1	-0.1713	0.01421	III
YBR182C_sn1924 (SMP1)	CWP1	-0.1712	0.03411	IV
YBR182C_sn1924 (SMP1)	CWP2	-0.1712	0.03411	IV
YMR076C_tsq985 (PDS5)	CCW12	-0.1711	0.0003296	I
YJR043C_dma2634_DMA30 (POL32)	TIR4	-0.1711	1.37e-07	IV
YNL240C_tsq2270 (NAR1)	PIR3	-0.1708	0.009748	IV
YKR020W_sn420 (VPS51)	CCW12	-0.1706	0.001126	I
YOR234C_sn3967 (RPL33B)	DSE2	-0.1706	0.02182	V
YJL174W_tsa1267_TSA26 (KRE9)	CCW12	-0.1705	6.89e-08	I
YNL138W_tsa675_TSA26 (SRV2)	CCW12	-0.1705	0.0005424	I
YKL176C_dma2888_DMA30 (LST4)	TIR4	-0.1705	0.002309	IV
YLL053C_sn3284	FIT1	-0.1704	0.01708	III
YOR181W_tsq230 (LAS17)	SPI1	-0.1704	0.01715	III
YHR108W_sn247 (GGA2)	CCW12	-0.1703	0.01198	I
YDR294C_dma1034_DMA30 (DPL1)	SUN4	-0.1703	0.03144	V
YDL136W_dma732_DMA30 (RPL35B)	TIR2	-0.1703	0.04323	IV
YKL081W_dma2815_DMA30 (TEF4)	CCW14	-0.1702	0.001352	II
YBR103W_dma254_DMA30 (SIF2)	SPS2	-0.1702	0.003096	IV
YMR194W_sn4083 (RPL36A)	FIT1	-0.1701	0.01404	III
YER179W_sn1397 (DMC1)	FIT3	-0.1701	0.02552	IV
YLR039C_dma3121_DMA30 (RIC1)	SUN4	-0.1701	0.001513	V
YOR070C_sn534 (GYP1)	CCW12	-0.17	1.23e-05	I
YKL021C_tsq1048 (MAK11)	ECM33	-0.17	0.01939	VI
YOR289W_dma4690_DMA30	SED1	-0.17	0.01285	IV
YLR026C_tsq198 (SED5)	DAN1	-0.1699	2e-07	IV
YPL261C_dma5015_DMA30	SPS22	-0.1699	0.04896	IV
YJR011C_dma2606_DMA30	FIT2	-0.1696	0.00994	III
YER093C_tsq811 (TSC11)	PST1	-0.1695	0.0005647	III
YOR328W_dma4740_DMA30 (PDR10)	SUN4	-0.1695	0.03255	V
YDR402C_dma1119_DMA30 (DIT2)	DSE2	-0.1692	0.009526	V
YDL094C_dma694_DMA30	CWP1	-0.1691	0.0193	IV
YDL094C_dma694_DMA30	CWP2	-0.1691	0.0193	IV
YGR085C_dma1855_DMA30 (RPL11B)	FLO10	-0.169	0.0115	III
YFR006W_dma1519_DMA30	SUN4	-0.169	0.001929	V
YDL157C_dma722_DMA30	CWP1	-0.1689	0.009707	IV
YDL157C_dma722_DMA30	CWP2	-0.1689	0.009707	IV
YKR007W_dma2921_DMA30 (MEH1)	TIR4	-0.1689	0.02864	IV
YFL034C-B_tsa940_TSA26 (MOB2)	CCW12	-0.1688	0.0379	I
YML017W_sn1703 (PSP2)	FIT1	-0.1687	0.01214	III
YGL022W_tsq1127 (STT3)	CCW12	-0.1686	1.51e-05	I
YJL095W_sn935 (BCK1)	PIR1	-0.1686	0.001344	IV
YPR070W_dma5068_DMA30 (MED1)	TIR3	-0.1686	9.74e-05	II
YKL150W_sn2716 (MCR1)	ECM33	-0.1685	0.04215	VI
YKL005C_sn1880 (BYE1)	FIT1	-0.1685	0.02807	III
YNL181W_damp898	CCW12	-0.1683	9.72e-10	I
YMR272C_dma3887_DMA30 (SCS7)	FLO10	-0.1683	0.004153	III
YFL039C_tsq64 (ACT1)	ECM33	-0.1681	0.0003937	VI
YER121W_dma1407_DMA30	CWP1	-0.1679	0.006942	IV
YER121W_dma1407_DMA30	CWP2	-0.1679	0.006942	IV
YAL027W_sn3723 (SAW1)	DAN1	-0.1679	0.03161	IV
YLR002C_damp737 (NOC3)	FLO10	-0.1679	1.37e-26	III
YIL015W_sn947 (BAR1)	ECM33	-0.1678	0.01765	VI
YAL059W_dma55_DMA30 (ECM1)	CWP1	-0.1677	0.02652	IV
YAL059W_dma55_DMA30 (ECM1)	CWP2	-0.1677	0.02652	IV
YLR191W_dma3258_DMA30 (PEX13)	SUN4	-0.1673	0.01915	V
YNR035C_tsq471 (ARC35)	CCW12	-0.1672	0.005296	I
YOR035C_sn557 (SHE4)	SED1	-0.1672	2.32e-08	IV
YFR028C_tsa146_TSA26 (CDC14)	CWP1	-0.1671	0.006256	IV
YIL129C_tsq2031 (TAO3)	PIR1	-0.1671	0.03863	IV
YJL174W_damp646 (KRE9)	CCW12	-0.167	2.72e-05	I
YNL090W_sn746 (RHO2)	FIT1	-0.167	8.3e-29	III
YLR388W_dma3432_DMA30 (RPS29A)	FIT2	-0.167	0.0008468	III
YLR330W_dma3362_DMA30 (CHS5)	HSP150	-0.1669	0.0003517	IV
YGL046W_dma1629_DMA30	TIR2	-0.1669	0.01712	IV
YDL192W_dma784_DMA30 (ARF1)	CCW14	-0.1668	0.03988	II
YKL125W_tsa527_TSA26 (RRN3)	SUN4	-0.1668	0.007684	V
YHR142W_sn208 (CHS7)	ECM33	-0.1667	0.001679	VI
YDL226C_dma810_DMA30 (GCS1)	FLO1	-0.1667	0.03166	III
YOL163W_dma4422_DMA30	SAG1	-0.1667	0.02799	VII
YPR192W_dma5151_DMA30 (AQY1)	SED1	-0.1667	0.006491	IV
YOR155C_sn3824 (ISN1)	PIR1	-0.1666	0.03586	IV
YLL047W_dma3094_DMA30	FIT1	-0.1665	0.02563	III
YLR153C_tsq2100 (ACS2)	SPI1	-0.1665	0.004839	III
YER158C_dma1442_DMA30	CIS3	-0.1664	0.008499	III
YGL005C_sn266 (COG7)	CCW12	-0.1662	0.003068	I
YDL066W_dma654_DMA30 (IDP1)	CWP1	-0.1662	0.007982	IV
YDL066W_dma654_DMA30 (IDP1)	CWP2	-0.1662	0.007982	IV
YGR210C_sn3453	SPS2	-0.166	0.01189	IV
YOL043C_sn1081 (NTG2)	FLO10	-0.1659	0.02264	III
YDL007W_damp264 (RPT2)	CCW12	-0.1657	7.76e-18	I
YHR107C_tsq53 (CDC12)	ECM33	-0.1656	0.002301	VI
YOR185C_sn1905 (GSP2)	FLO11	-0.1656	4.65e-06	II
YDR375C_dma1115_DMA30 (BCS1)	TIR1	-0.1656	9.13e-139	IV
YDR194W-A_sn4663	DAN1	-0.1652	0.04027	IV
YOL064C_dma4348_DMA30 (MET22)	FIT2	-0.1652	0.003491	III
YPR121W_dma5124_DMA30 (THI22)	FLO10	-0.1652	0.03118	III
YDR274C_dma1026_DMA30	HSP150	-0.1651	7.16e-09	IV
YML017W_dma3519_DMA30 (PSP2)	CIS3	-0.165	0.0002726	III
YHR102W_damp3322 (KIC1)	FIG2	-0.165	0.004333	III
YAL013W_sn2007 (DEP1)	SPI1	-0.165	0.001972	III
YPR023C_dma5033_DMA30 (EAF3)	SUN4	-0.1649	0.006543	V
YJL054W_tsq2057 (TIM54)	ECM33	-0.1648	0.0005544	VI
YOR161C_dma4566_DMA30 (PNS1)	SAG1	-0.1648	0.02472	VII
YOL025W_sn2958 (LAG2)	DAN1	-0.1647	0.0198	IV
YOR122C_tsq233 (PFY1)	ECM33	-0.1644	0.001945	VI
YPR154W_sn551 (PIN3)	FLO10	-0.1644	0.03407	III
YPL260W_dma4970_DMA30	FLO11	-0.1644	0.005282	II
YBR198C_tsq513 (TAF5)	HSP150	-0.1644	0.003019	IV
YBL105C_tsq539 (PKC1)	CWP1	-0.1643	0.004504	IV
YBL105C_tsq539 (PKC1)	CWP2	-0.1643	0.004504	IV
YDR011W_sn2317 (SNQ2)	ECM33	-0.1643	0.03799	VI
YDL029W_tsq886 (ARP2)	ECM33	-0.1642	0.001619	VI
YEL050C_sn4124 (RML2)	SPS2	-0.1642	0.01257	IV
YPR002W_dma5026_DMA30 (PDH1)	SED1	-0.1641	0.02234	IV
YPR063C_dma5074_DMA30	SED1	-0.1641	0.02042	IV
YNL233W_sn786 (BNI4)	HSP150	-0.164	3.17e-06	IV
YHR072W_tsq1982 (ERG7)	SPS2	-0.1639	0.04864	IV
YAR019C_tsa882_TSA26 (CDC15)	FLO11	-0.1638	0.04181	II
YNR017W_tsa1168_TSA26 (TIM23)	PIR3	-0.1638	0.04114	IV
YIL098C_dma2349_DMA30 (FMC1)	PST1	-0.1638	0.04027	III
YER166W_dma1460_DMA30 (DNF1)	SUN4	-0.1638	0.03847	V
YDR498C_tsq1066 (SEC20)	DAN1	-0.1637	3.04e-07	IV
YOR381W_dma4775_DMA30 (FRE3)	SUN4	-0.1637	0.01703	V
YBL105C_tsq539 (PKC1)	CIS3	-0.1635	0.001825	III
YDL203C_dma801_DMA30 (ACK1)	CIS3	-0.1634	0.01179	III
YPL110C_dma4858_DMA30 (GDE1)	DSE2	-0.1631	3.06e-06	V
YDL161W_sn3 (ENT1)	TIR2	-0.1631	0.002896	IV
YPL103C_dma4841_DMA30 (FMP30)	FIT2	-0.163	0.002839	III
YPL165C_dma4902_DMA30 (SET6)	SAG1	-0.163	0.01784	VII
YFL010C_sn3857 (WWM1)	SRL1	-0.163	0.01779	II
YJR057W_tsa22_TSA26 (CDC8)	SUN4	-0.163	0.03266	V
YPL055C_dma4805_DMA30 (LGE1)	TIR4	-0.163	2.9e-14	IV
YIL090W_dma2332_DMA30 (ICE2)	CCW14	-0.1629	0.03154	II
YEL050C_sn4124 (RML2)	TIR4	-0.1629	0.03862	IV
YOR026W_dma4443_DMA30 (BUB3)	CCW14	-0.1628	0.02832	II
YNL125C_dma4025_DMA30 (ESBP6)	SPS2	-0.1628	0.02302	IV
YBL107C_dma171_DMA30 (MIX23)	CWP1	-0.1627	0.04209	IV
YBL107C_dma171_DMA30 (MIX23)	CWP2	-0.1627	0.04209	IV
YGR033C_sn2507 (TIM21)	HSP150	-0.1627	0.0007949	IV
YGR136W_dma1891_DMA30 (LSB1)	CWP1	-0.1622	0.001324	IV
YGR136W_dma1891_DMA30 (LSB1)	CWP2	-0.1622	0.001324	IV
YGL046W_dma1629_DMA30	SPS2	-0.1622	0.009653	IV
YHR189W_sn3925 (PTH1)	CWP1	-0.1621	0.005049	IV
YHR189W_sn3925 (PTH1)	CWP2	-0.1621	0.005049	IV
YOR087W_sn2444	FLO10	-0.1621	0.006617	III
YPR061C_sn2533 (JID1)	CCW12	-0.162	0.02923	I
YLR381W_sn1222 (CTF3)	CWP1	-0.1618	0.008063	IV
YMR086W_dma3695_DMA30 (SEG1)	FIT2	-0.1618	0.004959	III
YDL065C_dma655_DMA30 (PEX19)	PST1	-0.1618	0.02553	III
YDL248W_sn3802 (COS7)	PST1	-0.1617	8.03e-13	III
YDR145W_tsa806_TSA26 (TAF12)	SRL1	-0.1617	1.81e-11	II
YLR274W_tsa403_TSA26 (MCM5)	SUN4	-0.1617	0.02854	V
YKL025C_dma2753_DMA30 (PAN3)	CIS3	-0.1616	0.01288	III
YBL061C_dma137_DMA30 (SKT5)	HSP150	-0.1616	2.49e-09	IV
YDR208W_tsq129 (MSS4)	SPS2	-0.1616	0.0003935	IV
YGL115W_dma1678_DMA30 (SNF4)	TIR4	-0.1616	0.0004396	IV
YKL110C_dma2840_DMA30 (KTI12)	SPS2	-0.1614	0.02648	IV
YLR136C_dma3224_DMA30 (TIS11)	SUN4	-0.1614	0.006875	V
YBR104W_dma253_DMA30	SAG1	-0.1613	0.0305	VII
YKL057C_sn1862 (NUP120)	SRL1	-0.1613	0.009498	II
YIR002C_dma2389_DMA30 (MPH1)	SUN4	-0.1613	0.0239	V
YGL059W_dma1621_DMA30 (PKP2)	SAG1	-0.1611	0.01065	VII
YHR086W_dma2147_DMA30 (NAM8)	SAG1	-0.161	0.04065	VII
YKL113C_dma2839_DMA30 (RAD27)	SPS2	-0.1609	0.03878	IV
YNL306W_damp918 (MRPS18)	CCW12	-0.1607	0.00055	I
YJR075W_dma2662_DMA30 (HOC1)	SUN4	-0.1607	0.0227	V
YIR039C_sn16	TIP1	-0.1607	0.008444	III
YDR399W_sn4434 (HPT1)	ECM33	-0.1605	0.004549	VI
YBL105C_tsq538 (PKC1)	HSP150	-0.1605	0.0001838	IV
YLR261C_dma3305_DMA30 (VPS63)	CIS3	-0.1604	0.01204	III
YPL258C_dma4972_DMA30 (THI21)	FIT2	-0.1604	0.03279	III
YDR208W_tsq129 (MSS4)	FIG2	-0.1603	0.0002294	III
YFR010W_dma1515_DMA30 (UBP6)	FLO11	-0.1603	9.73e-06	II
YKL006W_dma2739_DMA30 (RPL14A)	SPS22	-0.1603	0.04576	IV
YML077W_tsa1131_TSA26 (BET5)	PIR3	-0.1602	1.07e-08	IV
YLR319C_sn568 (BUD6)	FIT2	-0.1601	0.01174	III
YLR400W_dma3422_DMA30	FIT2	-0.1601	0.02213	III
YLR153C_tsq2100 (ACS2)	SRL1	-0.1601	0.007895	II
YPR070W_dma5068_DMA30 (MED1)	SPS2	-0.16	4.13e-05	IV
YDL226C_sn205 (GCS1)	FLO1	-0.1599	6.43e-06	III
YNL100W_sn2598 (MIC27)	CWP1	-0.1598	0.04476	IV
YNL100W_sn2598 (MIC27)	CWP2	-0.1598	0.04476	IV
YPL106C_dma4839_DMA30 (SSE1)	SPS2	-0.1598	0.006733	IV
YEL059C-A_sn2707 (SOM1)	PIR3	-0.1597	0.005266	IV
YJL138C_sn4216 (TIF2)	SUN4	-0.1597	0.0002266	V
YGR227W_sn863 (DIE2)	CWP1	-0.1594	0.0299	IV
YGR227W_sn863 (DIE2)	CWP2	-0.1594	0.0299	IV
YNL016W_sn1836 (PUB1)	DAN1	-0.1592	0.01918	IV
YNL004W_sn1916 (HRB1)	HSP150	-0.1591	0.01038	IV
YDR074W_dma887_DMA30 (TPS2)	TIR4	-0.159	3.96e-09	IV
YNL147W_sn1904 (LSM7)	FLO1	-0.1589	0.00924	III
YOL046C_dma4343_DMA30	SED1	-0.1589	3.91e-05	IV
YOR026W_sn1468 (BUB3)	SPI1	-0.1589	3.97e-12	III
YHR142W_sn208 (CHS7)	HSP150	-0.1588	0.001094	IV
YML103C_dma3612_DMA30 (NUP188)	SUN4	-0.1588	0.0008523	V
YBR076W_dma247_DMA30 (ECM8)	TIR4	-0.1588	0.003505	IV
YMR197C_tsq635 (VTI1)	FIT1	-0.1587	0.02897	III
YGL032C_dma1614_DMA30 (AGA2)	SAG1	-0.1587	0.008806	VII
YKL166C_dma2872_DMA30 (TPK3)	SUN4	-0.1587	0.0005706	V
YOR181W_tsa912_TSA26 (LAS17)	HSP150	-0.1584	0.03633	IV
YLR105C_tsa676_TSA26 (SEN2)	SUN4	-0.1582	0.03862	V
YOL128C_dma4394_DMA30	SUN4	-0.1582	0.001006	V
YFL039C_tsq223 (ACT1)	HSP150	-0.1581	7.96e-05	IV
YIL146C_dma2365_DMA30 (ATG32)	CIS3	-0.158	0.04139	III
YDR178W_dma951_DMA30 (SDH4)	SAG1	-0.158	0.02192	VII
YNL006W_tsa466_TSA26 (LST8)	SRL1	-0.158	4.44e-20	II
YJL054W_tsq2057 (TIM54)	CCW12	-0.1579	0.004071	I
YMR307W_sn703 (GAS1)	CCW14	-0.1579	4.65e-14	II
YBR285W_sn3117	SPS2	-0.1579	0.01192	IV
YFL039C_tsq142 (ACT1)	SPS2	-0.1579	0.00699	IV
YLR087C_dma3192_DMA30 (CSF1)	SPS2	-0.1579	0.02625	IV
YDL106C_dma688_DMA30 (PHO2)	SAG1	-0.1578	0.02389	VII
YJL033W_tsq2048 (HCA4)	SPS2	-0.1578	0.0213	IV
YLR024C_dma3131_DMA30 (UBR2)	SUN4	-0.1578	1.57e-22	V
YOR110W_damp967 (TFC7)	SPI1	-0.1577	0.02255	III
YOR381W-A_sn4613	FIT1	-0.1576	0.0005213	III
YNR009W_dma4208_DMA30 (NRM1)	SAG1	-0.1576	0.04159	VII
YLR372W_dma3398_DMA30 (ELO3)	FIT2	-0.1575	0.002868	III
YOR336W_tsa139_TSA26 (KRE5)	CCW12	-0.1574	0.000524	I
YDR146C_dma927_DMA30 (SWI5)	CIS3	-0.1574	0.0006323	III
YGR088W_sn2163 (CTT1)	PIR1	-0.1574	0.04211	IV
YBL007C_dma91_DMA30 (SLA1)	SED1	-0.1574	0.001001	IV
YDR388W_dma1128_DMA30 (RVS167)	SPS2	-0.1574	1.74e-08	IV
YPL037C_dma4794_DMA30 (EGD1)	SED1	-0.1573	0.03276	IV
YPR075C_dma5087_DMA30 (OPY2)	SED1	-0.1573	0.04974	IV
YHR101C_tsq1344 (BIG1)	CCW12	-0.1571	0.005181	I
YDR478W_tsq1447 (SNM1)	FLO1	-0.1571	0.002053	III
YOR393W_sn2786 (ERR1)	FIT1	-0.157	0.02284	III
YFL039C_tsq1093 (ACT1)	CCW12	-0.1569	8.91e-12	I
YPL047W_dma4811_DMA30 (SGF11)	CCW14	-0.1569	0.01634	II
YNL009W_dma3932_DMA30 (IDP3)	SED1	-0.1568	0.03861	IV
YGR079W_dma1859_DMA30	SED1	-0.1567	0.004666	IV
YFR008W_sn692 (FAR7)	TIR4	-0.1563	0.03687	IV
YLR459W_tsq1254 (GAB1)	ECM33	-0.1561	0.01342	VI
YMR268C_tsq1113 (PRP24)	FLO1	-0.1561	0.006059	III
YFL039C_tsq1094 (ACT1)	HSP150	-0.1561	0.004605	IV
YGL095C_sn336 (VPS45)	FIG2	-0.156	1.46e-30	III
YLR194C_dma3255_DMA30 (NCW2)	SUN4	-0.156	0.02968	V
YDR294C_sn2995 (DPL1)	FLO10	-0.1558	0.03026	III
YDR149C_dma947_DMA30	HSP150	-0.1557	1.24e-20	IV
YLR278C_sn1734	SRL1	-0.1557	0.02972	II
YOR168W_tsq1426 (GLN4)	HSP150	-0.1556	0.04764	IV
YOL112W_dma4383_DMA30 (MSB4)	FIT1	-0.1555	0.008921	III
YMR244W_dma3863_DMA30	SED1	-0.1554	0.001682	IV
YFL039C_tsq903 (ACT1)	SPS2	-0.1554	5.05e-15	IV
YOL081W_dma4362_DMA30 (IRA2)	SPS22	-0.1554	2.85e-25	IV
YMR145C_dma3756_DMA30 (NDE1)	HSP150	-0.1553	0.02524	IV
YOL070C_sn654 (NBA1)	PIR3	-0.1553	0.02662	IV
YPL139C_dma4861_DMA30 (UME1)	PST1	-0.1553	1.58e-08	III
YBL041W_tsq1293 (PRE7)	SPS22	-0.1552	0.0034	IV
YER154W_sn2255 (OXA1)	SRL1	-0.1552	7.59e-07	II
YGR156W_tsq835 (PTI1)	CCW12	-0.155	0.01183	I
YCR061W_sn3432	CCW14	-0.155	0.01105	II
YBL054W_dma143_DMA30 (TOD6)	CIS3	-0.1549	0.02862	III
YDR184C_sn1020 (ATC1)	DAN1	-0.1549	0.0395	IV
YGL151W_sn1982 (NUT1)	FIT3	-0.1549	0.02893	IV
YDL207W_tsq923 (GLE1)	FLO1	-0.1549	0.02508	III
YDL112W_dma708_DMA30 (TRM3)	SAG1	-0.1549	0.02407	VII
YFL029C_damp35 (CAK1)	FIT1	-0.1547	0.0261	III
YDR289C_dma1037_DMA30 (RTT103)	FLO10	-0.1547	0.03479	III
YBL059C-A_sn3551 (CMC2)	TIR2	-0.1547	6.84e-05	IV
YPR117W_dma5104_DMA30	FIT2	-0.1545	0.01313	III
YJL137C_dma2526_DMA30 (GLG2)	SED1	-0.1545	0.01719	IV
YDR460W_tsa951_TSA26 (TFB3)	SRL1	-0.1544	0.0007311	II
YDR198C_dma962_DMA30 (RKM2)	CWP1	-0.1543	0.006143	IV
YDR198C_dma962_DMA30 (RKM2)	CWP2	-0.1543	0.006143	IV
YMR022W_dma3645_DMA30 (UBC7)	FLO11	-0.1543	0.01136	II
YGR104C_damp1174 (SRB5)	PST1	-0.1543	1.6e-09	III
YPL267W_dma5010_DMA30 (ACM1)	SED1	-0.1543	0.04433	IV
YGR222W_sn4101 (PET54)	SPS2	-0.1543	2.37e-08	IV
YDL105W_tsq993 (NSE4)	FLO1	-0.154	0.01824	III
YBL060W_dma138_DMA30	SED1	-0.1539	0.02587	IV
YLR373C_dma3420_DMA30 (VID22)	SED1	-0.1539	0.0002147	IV
YBR257W_damp245 (POP4)	SUN4	-0.1539	0.02071	V
YPL001W_dma4769_DMA30 (HAT1)	SUN4	-0.1539	0.01457	V
YBL029W_dma112_DMA30	FIT2	-0.1538	0.03221	III
YFL039C_tsq218 (ACT1)	ECM33	-0.1537	0.005536	VI
YMR015C_dma3629_DMA30 (ERG5)	FIG2	-0.1536	0.027	III
YNL127W_dma4024_DMA30 (FAR11)	FIT2	-0.1535	0.04686	III
YJL039C_damp83 (NUP192)	TIR4	-0.1535	0.00218	IV
YNL057W_dma3982_DMA30	CIS3	-0.1534	0.01929	III
YML007W_dma3505_DMA30	CIS3	-0.1533	0.002085	III
YCL001W-A_dma459_DMA30	CWP1	-0.1533	0.02507	IV
YCL001W-A_dma459_DMA30	CWP2	-0.1533	0.02507	IV
YFR048W_dma1573_DMA30 (RMD8)	SAG1	-0.1533	0.03898	VII
YDR188W_tsa1016_TSA26 (CCT6)	CWP1	-0.1532	0.008393	IV
YKR082W_dma3009_DMA30 (NUP133)	SED1	-0.1532	0.04976	IV
YHR191C_tsa322_TSA26 (CTF8)	SUN4	-0.1532	0.02026	V
YOR140W_dma4551_DMA30 (SFL1)	SPS2	-0.1531	0.00153	IV
YDR145W_tsa806_TSA26 (TAF12)	CWP1	-0.1528	3.07e-10	IV
YFL039C_tsa74_TSA26 (ACT1)	HSP150	-0.1528	0.02009	IV
YDR110W_dma906_DMA30 (FOB1)	SAG1	-0.1528	0.02174	VII
YGR211W_tsq547 (ZPR1)	CWP1	-0.1526	0.0007142	IV
YGR211W_tsq547 (ZPR1)	CWP2	-0.1526	0.0007142	IV
YPR139C_damp1371 (LOA1)	CCW14	-0.1525	0.0004843	II
YOL088C_sn345 (MPD2)	FIG2	-0.1525	0.005295	III
YOR165W_dma4562_DMA30 (SEY1)	SAG1	-0.1525	0.03427	VII
YKL069W_dma2802_DMA30	SED1	-0.1525	0.02945	IV
YPR073C_dma5066_DMA30 (LTP1)	SED1	-0.1525	0.02758	IV
YBR145W_sn2740 (ADH5)	CWP1	-0.1524	0.02831	IV
YBR145W_sn2740 (ADH5)	CWP2	-0.1524	0.02831	IV
YNL181W_tsq1678	FIG2	-0.1523	0.0003885	III
YOR116C_tsa831_TSA26 (RPO31)	SRL1	-0.1522	0.01377	II
YDL127W_dma720_DMA30 (PCL2)	SUN4	-0.1522	0.02185	V
YLR407W_sn3306	DAN1	-0.1521	0.03695	IV
YDR374C_dma1116_DMA30 (PHO92)	TIR2	-0.1521	0.03227	IV
YNL047C_sn554 (SLM2)	ECM33	-0.152	0.03988	VI
YBR225W_dma406_DMA30	FIT3	-0.152	0.04188	IV
YAL030W_dma26_DMA30 (SNC1)	SAG1	-0.152	0.02959	VII
YHL022C_dma2063_DMA30 (SPO11)	SAG1	-0.152	0.04701	VII
YEL002C_tsq581 (WBP1)	CCW12	-0.1519	0.01816	I
YDR491C_dma1204_DMA30	CWP1	-0.1519	0.000229	IV
YDR491C_dma1204_DMA30	CWP2	-0.1519	0.000229	IV
YCL060C_dma523_DMA30	FIT2	-0.1519	0.009833	III
YNR019W_sn3011 (ARE2)	SPS2	-0.1519	0.01011	IV
YOL043C_dma4310_DMA30 (NTG2)	SED1	-0.1518	0.0007299	IV
YPR180W_damp1090 (AOS1)	CCW12	-0.1517	0.0166	I
YMR301C_tsq2223 (ATM1)	FIT1	-0.1516	0.004159	III
YHR101C_tsq1344 (BIG1)	SED1	-0.1516	0	IV
YPR122W_dma5123_DMA30 (AXL1)	TIR4	-0.1516	0.01677	IV
YMR003W_dma3615_DMA30 (AIM34)	DAN1	-0.1514	0.01554	IV
YDL143W_tsq729 (CCT4)	CCW12	-0.1513	1.47e-07	I
YDL150W_tsq1741 (RPC53)	CCW12	-0.1513	1.84e-49	I
YER125W_tsq182 (RSP5)	ECM33	-0.1513	0.001268	VI
YBR217W_sn426 (ATG12)	CCW14	-0.1512	0.01059	II
YPR159C-A_sn4625	FIT1	-0.1512	0.02325	III
YER093C_tsa658_TSA26 (TSC11)	PIR3	-0.1512	0.0007715	IV
YJR025C_dma2622_DMA30 (BNA1)	TIR2	-0.1512	0.04163	IV
YGR197C_dma1967_DMA30 (SNG1)	CIS3	-0.1511	0.02678	III
YNL138W_tsq1176 (SRV2)	SRL1	-0.151	1.97e-08	II
YLR086W_tsq264 (SMC4)	CCW14	-0.1509	0.0001946	II
YPR152C_sn3745 (URN1)	ECM33	-0.1509	0.0374	VI
YFR031C-A_sn3963 (RPL2A)	FIT1	-0.1509	0.02159	III
YKL120W_dma2834_DMA30 (OAC1)	SAG1	-0.1509	0.03492	VII
YFL039C_tsq218 (ACT1)	CCW12	-0.1507	4.71e-05	I
YDR437W_tsa1014_TSA26 (GPI19)	PIR3	-0.1505	0.04471	IV
YER098W_sn4144 (UBP9)	SPS22	-0.1505	0.02483	IV
YBL021C_sn2127 (HAP3)	CWP2	-0.1504	0.002449	IV
YLR315W_dma3372_DMA30 (NKP2)	TIR1	-0.1504	0.01193	IV
YPL160W_tsq914 (CDC60)	CWP1	-0.1503	0.007759	IV
YPL160W_tsq914 (CDC60)	CWP2	-0.1503	0.007759	IV
YDR123C_dma920_DMA30 (INO2)	DSE2	-0.1503	4.59e-05	V
YLR355C_tsq2137 (ILV5)	FIT1	-0.1503	0.03448	III
YML123C_sn2217 (PHO84)	FIT1	-0.1502	0.005911	III
YNR060W_sn2367 (FRE4)	PIR1	-0.1502	0.02147	IV
YGR233C_dma1986_DMA30 (PHO81)	SED1	-0.1502	0.01613	IV
YMR044W_dma3649_DMA30 (IOC4)	SUN4	-0.1502	2.38e-18	V
YKL171W_dma2891_DMA30 (NNK1)	TIR4	-0.1502	0.04213	IV
YNL219C_sn917 (ALG9)	CCW14	-0.1501	6.5e-09	II
YOL032W_dma4317_DMA30 (OPI10)	SAG1	-0.1501	0.04778	VII
YDR073W_dma888_DMA30 (SNF11)	SPS2	-0.1499	0.03914	IV
YFL039C_tsa74_TSA26 (ACT1)	SRL1	-0.1499	1.59e-12	II
YMR307W_sn703 (GAS1)	CIS3	-0.1498	3.41e-06	III
YFL025C_sn223 (BST1)	ECM33	-0.1498	0.02578	VI
YOL147C_sn313 (PEX11)	FIG2	-0.1498	0.006693	III
YFL013C_dma5282_DMA30 (IES1)	FIT2	-0.1497	0.01301	III
YDR402C_sn1048 (DIT2)	FLO1	-0.1497	0.01712	III
YLR099C_dma3204_DMA30 (ICT1)	SUN4	-0.1497	0.04811	V
YBR035C_sn2818 (PDX3)	HSP150	-0.1496	2.21e-07	IV
YGL136C_dma1690_DMA30 (MRM2)	TIR2	-0.1496	1.35e-06	IV
YLR218C_dma3287_DMA30 (COA4)	TIR4	-0.1496	0.00481	IV
YIL046W-A_sn4526	DAN1	-0.1495	0.02227	IV
YBL097W_tsa510_TSA26 (BRN1)	CCW12	-0.1494	0.0115	I
YOL123W_tsa960_TSA26 (HRP1)	FLO11	-0.1494	0.02685	II
YOR272W_tsa734_TSA26	PIR3	-0.1494	0.0005932	IV
YCR028C-A_sn2657 (RIM1)	FIT2	-0.1493	0.001573	III
YLR323C_tsq2130 (CWC24)	SRL1	-0.1493	0.04081	II
YDR238C_tsq722 (SEC26)	FIG2	-0.1492	2.1e-12	III
YBR271W_dma442_DMA30 (EFM2)	SAG1	-0.1491	0.02212	VII
YKL045W_damp687 (PRI2)	CCW12	-0.149	1.46e-05	I
YGL137W_tsa546_TSA26 (SEC27)	SUN4	-0.149	3.35e-53	V
YKL041W_sn276 (VPS24)	TIR4	-0.149	0.003964	IV
YDL130W_sn4203 (RPP1B)	FLO1	-0.1489	0.02011	III
YLR330W_dma3362_DMA30 (CHS5)	SAG1	-0.1489	0.02204	VII
YGL008C_damp467 (PMA1)	ECM33	-0.1488	0.0001518	VI
YDR104C_dma912_DMA30 (SPO71)	SUN4	-0.1487	0.02913	V
YLR079W_dma3163_DMA30 (SIC1)	TIR4	-0.1487	0.02013	IV
YLR104W_dma3202_DMA30 (LCL2)	SAG1	-0.1486	0.03521	VII
YOR204W_tsq561 (DED1)	CCW12	-0.1485	7.21e-05	I
YOR068C_dma4478_DMA30 (VAM10)	CWP1	-0.1485	0.0001688	IV
YOR068C_dma4478_DMA30 (VAM10)	CWP2	-0.1485	0.0001688	IV
YPL261C_dma5015_DMA30	DSE2	-0.1485	0.00271	V
YOL002C_dma4273_DMA30 (IZH2)	SED1	-0.1485	0.04116	IV
YOR346W_sn1278 (REV1)	DSE2	-0.1483	0.02494	V
YJL010C_tsq2041 (NOP9)	SPS2	-0.1482	0.0049	IV
YHR036W_tsq1045 (BRL1)	ECM33	-0.1481	0.01442	VI
YLR170C_dma3231_DMA30 (APS1)	SAG1	-0.1481	0.03857	VII
YBR085W_dma5239_DMA30 (AAC3)	DSE2	-0.148	1.86e-08	V
YDR335W_dma1070_DMA30 (MSN5)	SAG1	-0.148	0.04315	VII
YGR001C_dma1781_DMA30 (EFM5)	FIT2	-0.1479	0.01801	III
YLR268W_sn211 (SEC22)	TIP1	-0.1479	0.000527	III
YMR307W_sn703 (GAS1)	CWP1	-0.1478	7.39e-07	IV
YMR307W_sn703 (GAS1)	CWP2	-0.1478	7.39e-07	IV
YGL178W_sn759 (MPT5)	FIT2	-0.1478	0.0004735	III
YDL088C_sn1859 (ASM4)	CCW12	-0.1477	1.58e-07	I
YGL152C_dma1702_DMA30	CWP1	-0.1476	0.0002167	IV
YGL152C_dma1702_DMA30	CWP2	-0.1476	0.0002167	IV
YOR243C_sn4233 (PUS7)	FIT1	-0.1476	0.04885	III
YDR494W_sn4130 (RSM28)	FLO11	-0.1476	0.003087	II
YDR382W_dma1111_DMA30 (RPP2B)	CIS3	-0.1475	0.002285	III
YPL049C_sn838 (DIG1)	CWP1	-0.1475	0.02764	IV
YCL044C_dma511_DMA30 (MGR1)	CWP1	-0.1475	0.02724	IV
YPL049C_sn838 (DIG1)	CWP2	-0.1475	0.02764	IV
YCL044C_dma511_DMA30 (MGR1)	CWP2	-0.1475	0.02724	IV
YLR121C_dma3213_DMA30	FIT2	-0.1475	0.02692	III
YDR336W_dma1092_DMA30 (MRX8)	FIT2	-0.1474	0.04732	III
YOR060C_damp958 (SLD7)	ECM33	-0.1473	0.001794	VI
YPL016W_damp157 (SWI1)	FIT1	-0.1473	0.03881	III
YBR171W_sn320 (SEC66)	CCW12	-0.1471	0.002239	I
YPL008W_dma4766_DMA30 (CHL1)	CIS3	-0.1471	0.001796	III
YML015C_tsq1143 (TAF11)	CWP1	-0.1471	0.02592	IV
YCL075W_dma539_DMA30	CWP1	-0.1471	0.01413	IV
YML015C_tsq1143 (TAF11)	CWP2	-0.1471	0.02592	IV
YCL075W_dma539_DMA30	CWP2	-0.1471	0.01413	IV
YLR015W_sn1203 (BRE2)	ECM33	-0.147	0.02499	VI
YOL007C_dma4292_DMA30 (CSI2)	FIT3	-0.147	0.04757	IV
YDR265W_dma1031_DMA30 (PEX10)	SUN4	-0.1468	0.04566	V
YKL049C_damp688 (CSE4)	CCW12	-0.1467	0.000517	I
YCR069W_dma582_DMA30 (CPR4)	CWP1	-0.1467	4.44e-05	IV
YCR069W_dma582_DMA30 (CPR4)	CWP2	-0.1467	4.44e-05	IV
YAL023C_sn870 (PMT2)	ECM33	-0.1467	0.002465	VI
YPR162C_tsa1247_TSA26 (ORC4)	PST1	-0.1467	0.0005784	III
YDL179W_dma751_DMA30 (PCL9)	SUN4	-0.1467	0.0333	V
YDR276C_dma1024_DMA30 (PMP3)	TIR4	-0.1467	9.73e-148	IV
YBR210W_sn594 (ERV15)	CCW12	-0.1466	0.02252	I
YPL106C_dma4839_DMA30 (SSE1)	CCW14	-0.1465	1.35e-06	II
YOR266W_dma4662_DMA30 (PNT1)	FLO10	-0.1465	0.003319	III
YNR066C_sn3689	SPS2	-0.1465	0.0004249	IV
YML075C_sn807 (HMG1)	SPS2	-0.1464	0.01892	IV
YOL165C_sn2743 (AAD15)	SPS2	-0.1464	7.71e-09	IV
YFL039C_tsq140 (ACT1)	CCW12	-0.1463	0.004757	I
YOR132W_dma4559_DMA30 (VPS17)	TIR3	-0.1463	0.003967	II
YLR218C_dma3287_DMA30 (COA4)	HSP150	-0.1462	0.003554	IV
YHR003C_sn2569 (TCD1)	SPI1	-0.1461	0.01038	III
YML123C_dma3620_DMA30 (PHO84)	SPS22	-0.1461	0.001127	IV
YLR314C_tsa885_TSA26 (CDC3)	SRL1	-0.1461	0.02525	II
YFL039C_tsa219_TSA26 (ACT1)	CCW12	-0.146	0.00304	I
YKR065C_sn2508 (PAM17)	DSE2	-0.146	2.91e-26	V
YBR065C_sn1749 (ECM2)	DSE2	-0.1459	0.02505	V
YPR015C_dma5038_DMA30	FIT1	-0.1459	0.02681	III
YPL066W_sn1150 (RGL1)	PIR1	-0.1459	0.02381	IV
YLL040C_dma3055_DMA30 (VPS13)	SAG1	-0.1459	0.04523	VII
YER178W_dma1475_DMA30 (PDA1)	SPS2	-0.1459	1.17e-07	IV
YBR023C_dma199_DMA30 (CHS3)	HSP150	-0.1458	1.63e-07	IV
YDR030C_dma5213_DMA30 (RAD28)	SAG1	-0.1458	0.02346	VII
YGR184C_sn1565 (UBR1)	SPS2	-0.1457	0.008076	IV
YLL009C_sn2634 (COX17)	FIT1	-0.1456	0.003436	III
YLR373C_dma3420_DMA30 (VID22)	TIR2	-0.1456	0.04389	IV
YCR101C_dma604_DMA30	CWP1	-0.1454	0.01079	IV
YCR101C_dma604_DMA30	CWP2	-0.1454	0.01079	IV
YOL132W_dma4414_DMA30 (GAS4)	SUN4	-0.1454	8.02e-07	V
YJL099W_sn238 (CHS6)	ECM33	-0.1453	2.81e-08	VI
YJR055W_sn649 (HIT1)	ECM33	-0.1453	0.001077	VI
YNL007C_damp131 (SIS1)	ECM33	-0.1453	0.01139	VI
YOR111W_sn3376	FIT2	-0.1453	0.04508	III
YBR012C_dma186_DMA30	SUN4	-0.1453	0.03648	V
YIL146C_dma2365_DMA30 (ATG32)	SUN4	-0.1453	0.02963	V
YBR218C_sn2853 (PYC2)	SPI1	-0.1452	2.25e-13	III
YBR107C_dma273_DMA30 (IML3)	SUN4	-0.1452	0.04334	V
YNR035C_tsa471_TSA26 (ARC35)	HSP150	-0.1451	0.02165	IV
YDR265W_dma1031_DMA30 (PEX10)	CWP1	-0.1449	0.04685	IV
YDR265W_dma1031_DMA30 (PEX10)	CWP2	-0.1449	0.04685	IV
YGR238C_sn790 (KEL2)	ECM33	-0.1449	0.01762	VI
YOR127W_sn581 (RGA1)	ECM33	-0.1448	0.01905	VI
YDL005C_sn2090 (MED2)	ECM33	-0.1447	1.48e-11	VI
YGR245C_tsq523 (SDA1)	ECM33	-0.1447	0.02028	VI
YPR092W_dma5079_DMA30	SUN4	-0.1447	0.03675	V
YJL004C_sn237 (SYS1)	CCW12	-0.1446	6.06e-22	I
YOL060C_sn2675 (MAM3)	ECM33	-0.1446	1.4e-06	VI
YHL020C_dma2042_DMA30 (OPI1)	PST1	-0.1446	0.003923	III
YHR098C_sn191 (SFB3)	TIR4	-0.1446	0.0157	IV
YLL009C_sn2634 (COX17)	TIR4	-0.1444	0.004354	IV
YKL038W_dma2766_DMA30 (RGT1)	SED1	-0.1443	0.03183	IV
YGL073W_tsa423_TSA26 (HSF1)	SUN4	-0.1443	2.64e-06	V
YER096W_dma1401_DMA30 (SHC1)	CIS3	-0.1442	0.0341	III
YJL068C_sn2828	ECM33	-0.1442	0	VI
YIL040W_dma2275_DMA30 (APQ12)	SUN4	-0.1442	0.01373	V
YJR044C_dma5320_DMA30 (VPS55)	DSE2	-0.1441	0.004758	V
YDL142C_dma729_DMA30 (CRD1)	CCW14	-0.144	4.58e-05	II
YBR253W_tsa1068_TSA26 (SRB6)	SUN4	-0.144	0.03085	V
YBR096W_sn72	CCW12	-0.1439	0.0002235	I
YIL017C_sn1488 (VID28)	ECM33	-0.1439	1.37e-08	VI
YDL149W_dma726_DMA30 (ATG9)	SAG1	-0.1439	0.03796	VII
YOL045W_sn2938 (PSK2)	CCW12	-0.1438	0.03658	I
YPR179C_dma5157_DMA30 (HDA3)	CIS3	-0.1438	0.02535	III
YNR006W_dma4211_DMA30 (VPS27)	TIR4	-0.1438	0.03035	IV
YNL219C_sn917 (ALG9)	CWP1	-0.1437	1.37e-58	IV
YNL219C_sn917 (ALG9)	CWP2	-0.1437	1.37e-58	IV
YKL121W_sn3275 (DGR2)	ECM33	-0.1436	0.0002055	VI
YDL083C_dma679_DMA30 (RPS16B)	FIT2	-0.1436	0.03383	III
YIL033C_sn1016 (BCY1)	SPI1	-0.1435	0.01949	III
YFL041W_dma1511_DMA30 (FET5)	SUN4	-0.1435	0.002453	V
YPL011C_tsq2363 (TAF3)	TIP1	-0.1433	0.001003	III
YGR189C_dma1949_DMA30 (CRH1)	CIS3	-0.1432	0.0001686	III
YHR191C_sn1456 (CTF8)	FIT1	-0.1432	5.26e-16	III
YNL310C_damp920 (ZIM17)	CCW12	-0.143	0.04248	I
YLL009C_sn2634 (COX17)	CCW14	-0.1429	0.001153	II
YIL146C_sn715 (ATG32)	FIT1	-0.1429	0.0373	III
YKR082W_sn1863 (NUP133)	PST1	-0.1428	0.02159	III
YMR197C_tsa634_TSA26 (VTI1)	SRL1	-0.1428	0.0231	II
YOR277C_dma4675_DMA30	SED1	-0.1427	0.01887	IV
YBR160W_tsa175_TSA26 (CDC28)	SRL1	-0.1427	0.0004402	II
YMR213W_tsq702 (CEF1)	FIT1	-0.1426	0.0001942	III
YPL019C_dma4784_DMA30 (VTC3)	SUN4	-0.1426	0.01962	V
YBR082C_dma245_DMA30 (UBC4)	CCW14	-0.1425	0.01456	II
YNL054W_sn504 (VAC7)	ECM33	-0.1424	0.03914	VI
YMR294W-A_dma3894_DMA30	FLO10	-0.1423	0.04837	III
YKL197C_dma2900_DMA30 (PEX1)	TIR4	-0.1423	0.02929	IV
YER009W_tsq1238 (NTF2)	CCW14	-0.1422	0.0232	II
YMR035W_sn2662 (IMP2)	TIR4	-0.1422	7.34e-07	IV
YLR257W_dma3307_DMA30	CIS3	-0.1421	1.09e-05	III
YLR090W_dma3190_DMA30 (XDJ1)	SED1	-0.1421	0.004359	IV
YPL063W_tsa1189_TSA26 (TIM50)	SUN4	-0.1421	0.00149	V
YGL031C_dma1615_DMA30 (RPL24A)	CCW14	-0.1419	0.005272	II
YOR297C_sn376 (TIM18)	DSE2	-0.1419	3.8e-11	V
YGL093W_tsq824 (SPC105)	SPS2	-0.1419	0.03863	IV
YGL195W_dma1722_DMA30 (GCN1)	DAN1	-0.1418	0.02726	IV
YGL021W_dma1598_DMA30 (ALK1)	CWP1	-0.1417	4.36e-12	IV
YGL021W_dma1598_DMA30 (ALK1)	CWP2	-0.1417	4.36e-12	IV
YDL001W_sn1107 (RMD1)	TIR4	-0.1417	0.03845	IV
YMR137C_sn1272 (PSO2)	ECM33	-0.1416	3.19e-05	VI
YHR036W_tsq1043 (BRL1)	TIR4	-0.1415	0.004041	IV
YOR163W_dma4564_DMA30 (DDP1)	CCW14	-0.1414	0.007512	II
YML015C_tsq1143 (TAF11)	SED1	-0.1414	0.006548	IV
YPL208W_dma4934_DMA30 (RKM1)	DSE2	-0.1413	0.006738	V
YOR154W_dma4568_DMA30 (SLP1)	FIT2	-0.1413	0.04567	III
YOR136W_dma4555_DMA30 (IDH2)	FLO10	-0.1413	0.02072	III
YER151C_sn953 (UBP3)	CCW12	-0.1412	0.002885	I
YLR342W_dma3377_DMA30 (FKS1)	CIS3	-0.1412	0.02225	III
YNL127W_sn691 (FAR11)	CCW12	-0.1411	0.00426	I
YBL007C_dma91_DMA30 (SLA1)	SPS2	-0.1411	0.002802	IV
YDL181W_dma749_DMA30 (INH1)	FIT2	-0.141	2.24e-05	III
YOL046C_dma4343_DMA30	FIT2	-0.141	0.03702	III
YIR006C_damp606 (PAN1)	CCW12	-0.1409	0.0004057	I
YPL093W_damp1029 (NOG1)	CCW12	-0.1409	0.01326	I
YPR023C_dma5033_DMA30 (EAF3)	CCW14	-0.1409	0.03076	II
YBL061C_sn1237 (SKT5)	HSP150	-0.1409	0.009577	IV
YNR043W_tsa828_TSA26 (MVD1)	SRL1	-0.1408	3.81e-05	II
YCR028C-A_dma561_DMA30 (RIM1)	TIR4	-0.1408	0.0003716	IV
YDR190C_tsq1757 (RVB1)	ECM33	-0.1407	0.01887	VI
YOR205C_sn2522 (GEP3)	FIT2	-0.1407	0.02915	III
YEL060C_sn469 (PRB1)	FLO10	-0.1407	0.004971	III
YGR060W_tsq1929 (ERG25)	FIT2	-0.1405	0.0248	III
YFL039C_tsa140_TSA26 (ACT1)	HSP150	-0.1405	0.001205	IV
YFL063W_dma5266_DMA30	PST1	-0.1405	3.58e-05	III
YLR311C_dma3339_DMA30	DAN1	-0.1404	0.0371	IV
YKR053C_sn2986	SPS2	-0.1404	0.02847	IV
YOR197W_dma4631_DMA30 (MCA1)	DAN1	-0.1403	3.88e-06	IV
YEL036C_sn859 (ANP1)	FIG2	-0.1403	0.005297	III
YBL105C_tsa539_TSA26 (PKC1)	HSP150	-0.1403	0.0004438	IV
YDL147W_damp294 (RPN5)	CCW12	-0.1402	0.01043	I
YER017C_sn2697 (AFG3)	FIT2	-0.1402	0.009001	III
YPL075W_damp1025 (GCR1)	CCW12	-0.1401	0.009348	I
YGR006W_tsa430_TSA26 (PRP18)	PIR3	-0.1401	0.03865	IV
YJL002C_damp612 (OST1)	CCW12	-0.14	0.008283	I
YMR123W_dma3715_DMA30 (PKR1)	CCW14	-0.14	0.007633	II
YBR141C_sn3717 (BMT2)	FIG2	-0.14	0.003241	III
YOR100C_sn2816 (CRC1)	FIT1	-0.14	8.19e-16	III
YDR246W_tsa1220_TSA26 (TRS23)	PST1	-0.1399	3.54e-07	III
YOR181W_damp983 (LAS17)	CCW12	-0.1398	0.0004066	I
YMR272C_sn2817 (SCS7)	SPI1	-0.1398	1.04e-10	III
YER025W_tsq1822 (GCD11)	ECM33	-0.1397	2.03e-06	VI
YLR191W_sn314 (PEX13)	ECM33	-0.1397	0.008554	VI
YPR153W_dma5148_DMA30	FLO10	-0.1397	0.04904	III
YDR478W_tsa1184_TSA26 (SNM1)	SRL1	-0.1397	3.45e-11	II
YDR516C_dma1233_DMA30 (EMI2)	CWP1	-0.1396	0.02443	IV
YDR516C_dma1233_DMA30 (EMI2)	CWP2	-0.1396	0.02443	IV
YPR192W_dma5151_DMA30 (AQY1)	FIT2	-0.1396	0.01061	III
YDL097C_tsq1364 (RPN6)	PIR3	-0.1396	0.0001253	IV
YLR219W_dma3286_DMA30 (MSC3)	SAG1	-0.1396	0.04161	VII
YOR267C_dma4661_DMA30 (HRK1)	SUN4	-0.1396	0.03188	V
YFL039C_tsq223 (ACT1)	SRL1	-0.1395	0.0005016	II
YNL067W_dma3975_DMA30 (RPL9B)	FLO11	-0.1393	0	II
YBR188C_dma343_DMA30 (NTC20)	FLO10	-0.1392	0.03996	III
YFL039C_tsq1206 (ACT1)	SPS2	-0.1391	0.04321	IV
YGL042C_dma5186_DMA30	CCW14	-0.139	0.000746	II
YDR148C_sn4692 (KGD2)	FIG2	-0.139	0.0007036	III
YML115C_sn861 (VAN1)	SRL1	-0.139	4.23e-06	II
YFL034C-B_damp36 (MOB2)	CCW12	-0.1389	0.001107	I
YGL011C_damp468 (SCL1)	CCW12	-0.1389	0.001556	I
YFL039C_tsq1081 (ACT1)	ECM33	-0.1389	0.00123	VI
YML130C_tsq203 (ERO1)	FIG2	-0.1389	5.32e-09	III
YNL181W_tsq1678	SED1	-0.1389	0.008447	IV
YBR284W_dma454_DMA30	CWP1	-0.1388	0.01263	IV
YBR284W_dma454_DMA30	CWP2	-0.1388	0.01263	IV
YIL009C-A_sn1646 (EST3)	ECM33	-0.1388	2.05e-10	VI
YNL159C_sn4489 (ASI2)	HSP150	-0.1388	9.61e-07	IV
YDL077C_dma649_DMA30 (VAM6)	TIR4	-0.1388	0.0008738	IV
YLR053C_dma3133_DMA30	FIT2	-0.1386	0.04771	III
YMR044W_dma3649_DMA30 (IOC4)	FLO11	-0.1386	0.02133	II
YAL002W_sn273 (VPS8)	PIR1	-0.1386	0.0001926	IV
YBR154C_tsa1110_TSA26 (RPB5)	CCW12	-0.1385	0.03992	I
YPR070W_dma5068_DMA30 (MED1)	CIS3	-0.1385	0.01393	III
YNL138W_tsq675 (SRV2)	ECM33	-0.1385	0.000131	VI
YER125W_tsa464_TSA26 (RSP5)	PIR3	-0.1385	0.04897	IV
YKR086W_tsa598_TSA26 (PRP16)	PST1	-0.1385	0.0001615	III
YKL167C_sn4023 (MRP49)	ECM33	-0.1384	0.03808	VI
YMR052W_sn1177 (FAR3)	CCW12	-0.1383	0.04384	I
YER133W_damp441 (GLC7)	FIG2	-0.1383	0.009205	III
YPL221W_dma4950_DMA30 (FLC1)	SUN4	-0.1383	1.31e-10	V
YPR016C_tsa1010_TSA26 (TIF6)	SUN4	-0.1382	0.00672	V
YPL147W_dma4879_DMA30 (PXA1)	SUN4	-0.138	0.03927	V
YJR065C_tsq1203 (ARP3)	SED1	-0.1379	0.01262	IV
YLR352W_dma3391_DMA30	SED1	-0.1379	0.03624	IV
YDR368W_dma1098_DMA30	CWP1	-0.1378	0.001828	IV
YDR368W_dma1098_DMA30	CWP2	-0.1378	0.001828	IV
YGR120C_tsq187 (COG2)	ECM33	-0.1378	0.008349	VI
YKL057C_sn1862 (NUP120)	ECM33	-0.1378	0.04479	VI
YMR319C_dma3917_DMA30 (FET4)	SAG1	-0.1378	0.04428	VII
YNL156C_dma4052_DMA30 (NSG2)	CCW14	-0.1377	0.001366	II
YMR089C_sn2698	PIR3	-0.1377	9.38e-05	IV
YGL112C_tsa608_TSA26 (TAF6)	PST1	-0.1377	0.04333	III
YDR162C_sn990 (NBP2)	ECM33	-0.1376	2.51e-05	VI
YJL011C_damp617 (RPC17)	CCW12	-0.1375	4.57e-05	I
YPR121W_dma5124_DMA30 (THI22)	SUN4	-0.1375	0.04871	V
YCL063W_dma520_DMA30 (VAC17)	CWP1	-0.1374	0.02408	IV
YCL063W_dma520_DMA30 (VAC17)	CWP2	-0.1374	0.02408	IV
YBL007C_sn761 (SLA1)	HSP150	-0.1374	0.0003241	IV
YDR019C_sn4409 (GCV1)	PIR1	-0.1374	6.59e-08	IV
YGR089W_sn1221 (NNF2)	FLO11	-0.1373	0.01077	II
YBL096C_dma179_DMA30	SAG1	-0.1373	0.03679	VII
YBR107C_dma273_DMA30 (IML3)	PST1	-0.1372	0.0002238	III
YLR287C_dma3330_DMA30	FLO11	-0.1371	0.005548	II
YBR286W_dma452_DMA30 (APE3)	CWP1	-0.137	0.03542	IV
YBR286W_dma452_DMA30 (APE3)	CWP2	-0.137	0.03542	IV
YJR098C_dma2667_DMA30	SED1	-0.137	0.03889	IV
YML128C_dma3618_DMA30 (MSC1)	SPS2	-0.137	0.02461	IV
YFR020W_dma1551_DMA30 (CSS2)	SUN4	-0.137	1.97e-05	V
YPR115W_sn1708 (RGC1)	TIP1	-0.137	3.6e-06	III
YGR037C_dma1801_DMA30 (ACB1)	CWP1	-0.1369	0.0319	IV
YGR037C_dma1801_DMA30 (ACB1)	CWP2	-0.1369	0.0319	IV
YPL037C_dma4794_DMA30 (EGD1)	SPS2	-0.1369	0.03613	IV
YNL051W_sn263 (COG5)	CCW12	-0.1367	0.02455	I
YPR070W_dma5068_DMA30 (MED1)	CCW14	-0.1367	0.01824	II
YOR053W_dma4465_DMA30	FIT3	-0.1367	0.03901	IV
YDL067C_sn2470 (COX9)	CWP2	-0.1365	0.01985	IV
YLR039C_sn256 (RIC1)	FIG2	-0.1365	0.001939	III
YLR022C_tsq1028 (SDO1)	PST1	-0.1365	0.009895	III
YBR263W_sn4406 (SHM1)	SUN4	-0.1365	0.0447	V
YPL230W_dma4965_DMA30 (USV1)	DSE2	-0.1364	0.004147	V
YML117W_dma3604_DMA30 (NAB6)	FLO11	-0.1364	0.0151	II
YDR494W_sn4130 (RSM28)	HSP150	-0.1364	0.00609	IV
YGL211W_dma1733_DMA30 (NCS6)	SAG1	-0.1364	0.02825	VII
YOR235W_dma4655_DMA30	CCW14	-0.1363	3.38e-05	II
YBL105C_tsq537 (PKC1)	CIS3	-0.1362	0.01234	III
YLR261C_dma3305_DMA30 (VPS63)	SED1	-0.1362	0.03528	IV
YPR191W_sn2480 (QCR2)	HSP150	-0.1361	0.00461	IV
YML075C_dma3580_DMA30 (HMG1)	DAN1	-0.136	0.001206	IV
YGR187C_sn3416 (HGH1)	FIG2	-0.1359	0.01365	III
YDL201W_dma802_DMA30 (TRM8)	SAG1	-0.1359	0.03482	VII
YOR087W_sn2444	SPI1	-0.1359	0.04109	III
YJL183W_sn910 (MNN11)	CCW12	-0.1358	0.004107	I
YFL039C_tsa142_TSA26 (ACT1)	CWP1	-0.1358	1.8e-08	IV
YDR043C_sn2002 (NRG1)	FLO11	-0.1358	2e-05	II
YFL039C_tsq223 (ACT1)	SED1	-0.1358	0.0006029	IV
YPL047W_dma4811_DMA30 (SGF11)	SUN4	-0.1358	0.0001466	V
YPR065W_dma5072_DMA30 (ROX1)	CCW14	-0.1357	4.2e-05	II
YKL048C_sn1545 (ELM1)	ECM33	-0.1357	0.02007	VI
YOL123W_tsa858_TSA26 (HRP1)	FLO11	-0.1357	0.003354	II
YPL280W_sn3816 (HSP32)	PIR3	-0.1357	3.59e-12	IV
YER042W_sn1000 (MXR1)	HSP150	-0.1356	0.003415	IV
YPL256C_dma4974_DMA30 (CLN2)	CCW14	-0.1355	0.005953	II
YIR005W_sn2070 (IST3)	SPI1	-0.1355	0.01088	III
YER134C_dma1422_DMA30	SUN4	-0.1355	0.02824	V
YIR010W_tsa435_TSA26 (DSN1)	SUN4	-0.1354	0.04175	V
YMR211W_tsq1454 (DML1)	TIP1	-0.1354	8.38e-16	III
YIL055C_dma2286_DMA30	CIS3	-0.1353	0.03615	III
YMR146C_tsq2193 (TIF34)	SRL1	-0.1353	0.0412	II
YMR282C_dma3879_DMA30 (AEP2)	CCW14	-0.135	0.02081	II
YER157W_tsq1064 (COG3)	FLO1	-0.135	0.03899	III
YGR172C_tsq982	FLO1	-0.135	0.04847	III
YDR005C_dma837_DMA30 (MAF1)	FLO11	-0.135	4.76e-07	II
YLR099C_sn622 (ICT1)	SPS22	-0.1349	0.02921	IV
YDL122W_sn340 (UBP1)	HSP150	-0.1348	0.002151	IV
YGL064C_sn2723 (MRH4)	PIR1	-0.1348	0.00195	IV
YNL315C_sn2694 (ATP11)	FIT1	-0.1347	0.001233	III
YKL096C-B_sn4544	CCW12	-0.1346	0.009115	I
YDR189W_tsq251 (SLY1)	FIG2	-0.1346	0.001262	III
YOL008W_sn3358 (COQ10)	PST1	-0.1346	6.35e-10	III
YMR307W_sn703 (GAS1)	ECM33	-0.1345	0.00283	VI
YPL006W_sn2993 (NCR1)	HSP150	-0.1345	0.001329	IV
YMR240C_tsa639_TSA26 (CUS1)	SUN4	-0.1345	0.04162	V
YPR078C_dma5084_DMA30	DSE2	-0.1344	0.0001566	V
YKL041W_dma2763_DMA30 (VPS24)	TIR4	-0.1344	3.1e-05	IV
YPL178W_dma4915_DMA30 (CBC2)	CCW14	-0.1343	0.04315	II
YNR041C_sn2731 (COQ2)	FLO1	-0.1343	5.57e-10	III
YPR178W_tsq500 (PRP4)	ECM33	-0.1341	0.02958	VI
YBR186W_dma345_DMA30 (PCH2)	FIT1	-0.1341	0.04697	III
YKR063C_tsq2092 (LAS1)	SPS2	-0.1341	0.04	IV
YDL133C-A_dma714_DMA30 (RPL41B)	CWP1	-0.134	0.02263	IV
YDL133C-A_dma714_DMA30 (RPL41B)	CWP2	-0.134	0.02263	IV
YDR531W_tsq1415 (CAB1)	ECM33	-0.134	4.86e-07	VI
YJR120W_dma2721_DMA30	CCW14	-0.1339	0.0342	II
YAL018C_sn3084 (LDS1)	DAN1	-0.1339	0.03362	IV
YML077W_tsa1131_TSA26 (BET5)	PST1	-0.1338	0.0008435	III
YIL003W_tsq1992 (CFD1)	SED1	-0.1338	0.04517	IV
YMR311C_sn2869 (GLC8)	SPS22	-0.1338	0.02469	IV
YLR337C_dma3380_DMA30 (VRP1)	FIG2	-0.1336	0.002776	III
YKL213C_sn2176 (DOA1)	FLO1	-0.1336	0.009143	III
YOR074C_tsa927_TSA26 (CDC21)	PIR3	-0.1336	0.001941	IV
YML052W_dma3576_DMA30 (SUR7)	PST1	-0.1335	0.02816	III
YKL052C_tsq1005 (ASK1)	ECM33	-0.1334	0.002557	VI
YLR443W_dma3503_DMA30 (ECM7)	FLO11	-0.1334	0.002614	II
YDL243C_dma818_DMA30 (AAD4)	PST1	-0.1334	0.0141	III
YBR108W_sn1122 (AIM3)	SPS2	-0.1334	0.02852	IV
YOR249C_tsq746 (APC5)	SPS2	-0.1334	0.001751	IV
YBR131W_dma294_DMA30 (CCZ1)	SPS22	-0.1334	0.02579	IV
YDR082W_tsa599_TSA26 (STN1)	PIR3	-0.1333	0.03492	IV
YOR228C_dma4638_DMA30 (MCP1)	SED1	-0.1333	0.03689	IV
YCL001W_dma460_DMA30 (RER1)	CWP1	-0.1332	4.44e-09	IV
YCL001W_dma460_DMA30 (RER1)	CWP2	-0.1332	4.44e-09	IV
YLR186W_tsq1058 (EMG1)	SUN4	-0.1332	0.0005455	V
YMR060C_dma3662_DMA30 (SAM37)	FLO11	-0.1331	0.01462	II
YER151C_dma1447_DMA30 (UBP3)	SPS2	-0.1331	0.001152	IV
YPR012W_dma5018_DMA30	SUN4	-0.1331	0.03694	V
YNL016W_dma3927_DMA30 (PUB1)	HSP150	-0.133	0.001571	IV
YGL163C_dma1715_DMA30 (RAD54)	TIR2	-0.133	0.001591	IV
YJR073C_sn887 (OPI3)	FIG2	-0.1328	2.37e-08	III
YDR131C_sn3886	SPI1	-0.1328	1.05e-05	III
YPR103W_damp1069 (PRE2)	CCW12	-0.1327	9.6e-40	I
YDR540C_dma1238_DMA30 (IRC4)	FIT2	-0.1327	0.03205	III
YOL097C_damp944 (WRS1)	PIR3	-0.1327	5.04e-05	IV
YGL022W_tsa551_TSA26 (STT3)	PIR3	-0.1327	0.01874	IV
YDR524C-B_sn4665	CCW12	-0.1326	0.00215	I
YAL013W_sn2007 (DEP1)	CCW14	-0.1326	0.002672	II
YDR375C_dma1115_DMA30 (BCS1)	HSP150	-0.1326	0.02056	IV
YER157W_tsa41_TSA26 (COG3)	PST1	-0.1326	3.27e-19	III
YPL177C_dma4916_DMA30 (CUP9)	CCW14	-0.1324	0.003516	II
YPL099C_sn3694 (INA17)	FIG2	-0.1324	0.003859	III
YDR088C_tsq657 (SLU7)	CCW12	-0.1323	0.001169	I
YDR358W_sn246 (GGA1)	ECM33	-0.1323	0.04934	VI
YGR105W_dma1867_DMA30 (VMA21)	FIG2	-0.1323	0.04405	III
YOR168W_tsq1426 (GLN4)	FIT1	-0.1323	0.03081	III
YIR007W_dma2422_DMA30 (EGH1)	PST1	-0.1323	0.04939	III
YGL126W_dma1672_DMA30 (SCS3)	SAG1	-0.1323	0.02199	VII
YBL097W_tsq510 (BRN1)	SPI1	-0.1323	2.09e-10	III
YJL112W_dma2519_DMA30 (MDV1)	TIR2	-0.1322	0.02086	IV
YBR238C_dma419_DMA30	SED1	-0.1321	0.04504	IV
YPL086C_dma4832_DMA30 (ELP3)	DSE2	-0.132	0.009401	V
YOR205C_sn2522 (GEP3)	SPS22	-0.132	1.61e-75	IV
YMR167W_dma3760_DMA30 (MLH1)	SED1	-0.1319	0.02404	IV
YGR086C_dma1854_DMA30 (PIL1)	SPS2	-0.1319	0.005292	IV
YLR035C_sn1261 (MLH2)	CWP1	-0.1317	0.009186	IV
YLR035C_sn1261 (MLH2)	CWP2	-0.1317	0.009186	IV
YGL079W_dma1650_DMA30 (KXD1)	SED1	-0.1317	0.001168	IV
YAL053W_sn640 (FLC2)	ECM33	-0.1316	3.4e-05	VI
YLR366W_dma3403_DMA30	SAG1	-0.1316	0.03631	VII
YKL041W_dma2763_DMA30 (VPS24)	FIT2	-0.1315	0.0002677	III
YGL011C_tsa1084_TSA26 (SCL1)	PST1	-0.1315	0.02011	III
YML030W_sn2594 (RCF1)	SPI1	-0.1315	0.00577	III
YGR202C_sn889 (PCT1)	SPS2	-0.1313	0.02553	IV
YNL090W_sn746 (RHO2)	SPS22	-0.1311	0.02317	IV
YLR330W_sn464 (CHS5)	HSP150	-0.131	0.0002619	IV
YBL105C_tsq539 (PKC1)	PIR1	-0.131	3.56e-06	IV
YNL194C_sn3634	SPI1	-0.131	0.03919	III
YDL136W_dma732_DMA30 (RPL35B)	CCW14	-0.1309	2.73e-07	II
YPL098C_dma4846_DMA30 (MGR2)	CWP1	-0.1309	3.03e-11	IV
YPL098C_dma4846_DMA30 (MGR2)	CWP2	-0.1309	3.03e-11	IV
YNL272C_tsq1067 (SEC2)	SED1	-0.1309	0.003224	IV
YOR301W_dma4703_DMA30 (RAX1)	PST1	-0.1308	0.0235	III
YNL056W_sn3505 (OCA2)	SRL1	-0.1308	0.02368	II
YDL248W_sn3802 (COS7)	CIS3	-0.1307	5.41e-09	III
YGL215W_dma1729_DMA30 (CLG1)	CIS3	-0.1307	0.04003	III
YBR031W_sn3981 (RPL4A)	CWP1	-0.1307	0.04536	IV
YDR313C_sn364 (PIB1)	ECM33	-0.1307	1.69e-10	VI
YGL143C_damp1118 (MRF1)	SED1	-0.1307	0.03665	IV
YER058W_sn2630 (PET117)	TIR4	-0.1307	0.02385	IV
YMR183C_dma3789_DMA30 (SSO2)	TIR4	-0.1307	0.01561	IV
YJL034W_tsq1092 (KAR2)	SED1	-0.1306	6.79e-05	IV
YAL036C_dma46_DMA30 (RBG1)	SPS2	-0.1306	0.01878	IV
YCR076C_dma577_DMA30 (FUB1)	CIS3	-0.1305	1.8e-05	III
YDL010W_dma619_DMA30 (GRX6)	SAG1	-0.1304	0.02817	VII
YJR034W_sn2631 (PET191)	SPS2	-0.1304	0.01406	IV
YJL174W_tsa1267_TSA26 (KRE9)	SRL1	-0.1303	0.04404	II
YNL055C_sn4586 (POR1)	TIR4	-0.1303	0.01091	IV
YNL219C_sn917 (ALG9)	ECM33	-0.1302	0.004445	VI
YOL112W_dma4383_DMA30 (MSB4)	FIT3	-0.1302	0.0007716	IV
YNL316C_sn4423 (PHA2)	SPS2	-0.1302	0.0429	IV
YGL048C_damp474 (RPT6)	CCW12	-0.1301	0.04654	I
YDL137W_dma731_DMA30 (ARF2)	CWP1	-0.1301	0.02539	IV
YDR333C_dma1072_DMA30 (RQC1)	CWP1	-0.1301	0.02216	IV
YDL137W_dma731_DMA30 (ARF2)	CWP2	-0.1301	0.02539	IV
YDR333C_dma1072_DMA30 (RQC1)	CWP2	-0.1301	0.02216	IV
YHR064C_damp1491 (SSZ1)	ECM33	-0.1301	0.004782	VI
YIL048W_damp588 (NEO1)	CCW12	-0.1299	0.0005271	I
YDL119C_dma703_DMA30 (HEM25)	FIT2	-0.1299	0.01683	III
YHR112C_sn4472	HSP150	-0.1299	7.51e-14	IV
YER093C_tsa811_TSA26 (TSC11)	CCW12	-0.1298	0.02671	I
YDL100C_sn440 (GET3)	FIG2	-0.1298	0.00252	III
YJR019C_dma2626_DMA30 (TES1)	SED1	-0.1298	6.89e-07	IV
YML003W_sn3315	CCW12	-0.1297	0.0005845	I
YDL150W_damp296 (RPC53)	ECM33	-0.1297	0.0007608	VI
YBR290W_sn409 (BSD2)	FIG2	-0.1297	0.02488	III
YHR024C_tsa526_TSA26 (MAS2)	SRL1	-0.1297	2.69e-07	II
YPL119C_sn2131 (DBP1)	FLO1	-0.1296	2.76e-09	III
YDL214C_dma795_DMA30 (PRR2)	CIS3	-0.1295	0.003121	III
YDR496C_dma1201_DMA30 (PUF6)	FLO10	-0.1295	0.01067	III
YIL062C_tsq888 (ARC15)	SPS2	-0.1295	0.03773	IV
YNL315C_sn2694 (ATP11)	CIS3	-0.1293	1.45e-06	III
YGL050W_dma1628_DMA30 (TYW3)	CWP1	-0.1292	0.03342	IV
YGL050W_dma1628_DMA30 (TYW3)	CWP2	-0.1292	0.03342	IV
YOL049W_dma4340_DMA30 (GSH2)	DAN1	-0.1292	0.008562	IV
YOL067C_dma4346_DMA30 (RTG1)	FIT2	-0.1292	0.01843	III
YGL260W_dma1785_DMA30	TIR2	-0.1292	0.03226	IV
YNL240C_tsq2270 (NAR1)	SPI1	-0.1291	0.03722	III
YML131W_dma3617_DMA30	SAG1	-0.129	0.04854	VII
YBR139W_sn2443	SPI1	-0.1287	0.04018	III
YCR020C_sn4691 (PET18)	SUN4	-0.1287	0.01031	V
YIL003W_tsq1992 (CFD1)	DSE2	-0.1286	0.009162	V
YOR122C_tsa232_TSA26 (PFY1)	SRL1	-0.1286	0.01492	II
YML015C_tsa645_TSA26 (TAF11)	SUN4	-0.1286	0.001744	V
YMR222C_sn4314 (FSH2)	CWP1	-0.1285	0.04241	IV
YMR222C_sn4314 (FSH2)	CWP2	-0.1285	0.04241	IV
YNL009W_dma3932_DMA30 (IDP3)	FLO11	-0.1285	0.02673	II
YHR164C_tsq352 (DNA2)	PIR3	-0.1285	0.006694	IV
YPL189W_dma4927_DMA30 (GUP2)	SED1	-0.1285	2.05e-09	IV
YOL021C_tsq1032 (DIS3)	SPI1	-0.1285	2.63e-07	III
YBR221C_dma364_DMA30 (PDB1)	TIR1	-0.1285	0	IV
YCR061W_sn3432	DSE2	-0.1284	0.03412	V
YGR034W_dma1803_DMA30 (RPL26B)	FIG2	-0.1284	2.82e-07	III
YLR006C_dma3098_DMA30 (SSK1)	SUN4	-0.1284	0.02736	V
YGL021W_sn1451 (ALK1)	CIS3	-0.1283	0.01205	III
YGR163W_sn1089 (GTR2)	CCW12	-0.1282	0.001158	I
YDR246W_tsa1220_TSA26 (TRS23)	PIR3	-0.1281	0.0001033	IV
YEL050C_sn4124 (RML2)	PST1	-0.1281	0.03121	III
YJL171C_dma2566_DMA30 (TOH1)	SED1	-0.1279	0.03267	IV
YLR186W_tsa1141_TSA26 (EMG1)	SRL1	-0.1278	0.001269	II
YDL171C_sn4338 (GLT1)	SUN4	-0.1278	0.04598	V
YDR264C_sn174 (AKR1)	CCW12	-0.1277	1.96e-06	I
YKL018W_tsa893_TSA26 (SWD2)	CCW12	-0.1277	0.0447	I
YMR238W_sn969 (DFG5)	ECM33	-0.1276	0.006003	VI
YDL094C_dma694_DMA30	TIR1	-0.1276	0.03585	IV
YFR029W_damp461 (PTR3)	ECM33	-0.1275	1.03e-08	VI
YOL097C_damp944 (WRS1)	FIT1	-0.1275	0.0004822	III
YDR245W_sn566 (MNN10)	SED1	-0.1275	2.33e-05	IV
YLR153C_tsq2100 (ACS2)	HSP150	-0.1274	0.02299	IV
YBR041W_dma209_DMA30 (FAT1)	TIR4	-0.1274	0.01103	IV
YGL167C_sn459 (PMR1)	TIR4	-0.1272	0.01261	IV
YAL025C_tsq1295 (MAK16)	DAN1	-0.1271	0.006836	IV
YGR061C_dma5192_DMA30 (ADE6)	DSE2	-0.1271	0.007315	V
YJR115W_dma2703_DMA30	FIT2	-0.1271	0.003072	III
YML123C_dma3620_DMA30 (PHO84)	DSE2	-0.127	0.01691	V
YNL061W_tsa630_TSA26 (NOP2)	HSP150	-0.127	0.04373	IV
YBR193C_tsa741_TSA26 (MED8)	CCW12	-0.1269	0.00082	I
YHL017W_sn41	CWP1	-0.1269	0.02152	IV
YHL017W_sn41	CWP2	-0.1269	0.02152	IV
YOL159C_dma4425_DMA30 (CSS3)	FLO11	-0.1269	0.04473	II
YNL021W_dma3925_DMA30 (HDA1)	HSP150	-0.1269	0.0005824	IV
YDR374C_sn3156 (PHO92)	TIP1	-0.1269	0.03702	III
YLR178C_sn4157 (TFS1)	FIG2	-0.1268	0.001013	III
YCL004W_damp9 (PGS1)	SUN4	-0.1268	9.39e-07	V
YDR035W_dma5224_DMA30 (ARO3)	CIS3	-0.1267	0.005111	III
YGL035C_sn2012 (MIG1)	FIG2	-0.1267	0.0266	III
YOL004W_sn2006 (SIN3)	FLO1	-0.1267	0.002351	III
YMR112C_tsq799 (MED11)	SPI1	-0.1267	0.0001957	III
YDR273W_dma1027_DMA30 (DON1)	SUN4	-0.1267	0.04407	V
YPL199C_dma4942_DMA30	SUN4	-0.1267	0.03073	V
YDL056W_dma659_DMA30 (MBP1)	TIR2	-0.1266	8.39e-06	IV
YDR054C_tsa92_TSA26 (CDC34)	FLO11	-0.1265	0.01015	II
YCL069W_dma518_DMA30 (VBA3)	CWP1	-0.1264	0.04459	IV
YCL069W_dma518_DMA30 (VBA3)	CWP2	-0.1264	0.04459	IV
YDL134C-A_dma711_DMA30	SAG1	-0.1264	0.02125	VII
YBR084W_sn2684 (MIS1)	SUN4	-0.1264	0.03873	V
YJR076C_tsa126_TSA26 (CDC11)	SUN4	-0.1263	0.003117	V
YDR166C_tsq54 (SEC5)	CWP1	-0.1262	0.04508	IV
YGL104C_dma1661_DMA30 (VPS73)	CWP1	-0.1261	0.001192	IV
YGL104C_dma1661_DMA30 (VPS73)	CWP2	-0.1261	0.001192	IV
YBR168W_sn4685 (PEX32)	FLO10	-0.1261	0.0359	III
YBL027W_dma114_DMA30 (RPL19B)	FLO10	-0.1261	0.002623	III
YCR036W_dma555_DMA30 (RBK1)	SED1	-0.1261	5.69e-33	IV
YIL131C_dma5310_DMA30 (FKH1)	TIR4	-0.126	0.03188	IV
YMR257C_sn4089 (PET111)	CCW14	-0.1259	0.005753	II
YLR412W_sn3495 (BER1)	CWP1	-0.1259	0.0467	IV
YLR412W_sn3495 (BER1)	CWP2	-0.1259	0.0467	IV
YIL129C_tsq2031 (TAO3)	FLO10	-0.1259	0.04622	III
YNL181W_tsq2251	CWP1	-0.1256	0.01921	IV
YNL181W_tsq2251	CWP2	-0.1256	0.01921	IV
YGL094C_dma5295_DMA30 (PAN2)	DSE2	-0.1256	0.002457	V
YLR208W_tsa52_TSA26 (SEC13)	PIR3	-0.1256	0.01895	IV
YNR017W_tsa1168_TSA26 (TIM23)	PST1	-0.1256	1.83e-06	III
YDR216W_dma973_DMA30 (ADR1)	SUN4	-0.1256	2.05e-05	V
YDR508C_dma1216_DMA30 (GNP1)	DAN1	-0.1255	0.01106	IV
YJR084W_dma2655_DMA30	SED1	-0.1255	0.02342	IV
YOR205C_sn2522 (GEP3)	SUN4	-0.1255	0.04631	V
YBL105C_tsq535 (PKC1)	CWP1	-0.1254	0.0006581	IV
YBL105C_tsq535 (PKC1)	CWP2	-0.1254	0.0006581	IV
YPL080C_dma4834_DMA30	SUN4	-0.1254	0.03383	V
YJL163C_dma2549_DMA30	FIG2	-0.1253	0.04087	III
YOL118C_dma4400_DMA30	FIT2	-0.1253	0.04661	III
YER048C_dma1353_DMA30 (CAJ1)	FLO11	-0.1253	0.03397	II
YFL039C_tsq1081 (ACT1)	HSP150	-0.1253	0.0002106	IV
YFL039C_tsq1257 (ACT1)	CCW14	-0.1252	0.03998	II
YKL166C_dma2872_DMA30 (TPK3)	FIG2	-0.1252	0.008709	III
YOR122C_tsa429_TSA26 (PFY1)	SUN4	-0.1252	4.74e-11	V
YEL025C_sn3576	ECM33	-0.1251	1.83e-08	VI
YGR140W_tsq133 (CBF2)	SUN4	-0.125	0.0001262	V
YOR350C_sn2534 (MNE1)	CWP1	-0.1249	0.01917	IV
YOR350C_sn2534 (MNE1)	CWP2	-0.1249	0.01917	IV
YKR060W_dma3000_DMA30 (UTP30)	FIT2	-0.1249	1.62e-22	III
YIL147C_tsq1003 (SLN1)	SED1	-0.1249	6.81e-13	IV
YFL029C_damp35 (CAK1)	SPS2	-0.1249	0.04376	IV
YOR277C_dma4675_DMA30	CIS3	-0.1247	0.04041	III
YHR111W_sn1561 (UBA4)	DAN1	-0.1247	0.02006	IV
YPL049C_sn838 (DIG1)	DAN1	-0.1247	0.04379	IV
YGR253C_tsq1371 (PUP2)	SPS2	-0.1247	0.00335	IV
YDR183W_dma969_DMA30 (PLP1)	SUN4	-0.1247	0.03216	V
YPL063W_tsq1425 (TIM50)	TIP1	-0.1247	6.57e-07	III
YIL086C_dma2336_DMA30	FIT2	-0.1246	0.04378	III
YKR020W_dma2932_DMA30 (VPS51)	PST1	-0.1246	1.02e-15	III
YEL032W_tsq1075 (MCM3)	SPS2	-0.1246	0.03352	IV
YOL159C-A_sn3513	FIT2	-0.1245	1.95e-05	III
YGL211W_sn2536 (NCS6)	FLO1	-0.1244	0.009765	III
YER096W_dma1401_DMA30 (SHC1)	DSE2	-0.1243	2.3e-08	V
YER183C_dma1470_DMA30 (FAU1)	SPS2	-0.1243	0.01214	IV
YOL023W_sn4207 (IFM1)	SRL1	-0.1243	1.88e-09	II
YFR013W_dma1558_DMA30 (IOC3)	SUN4	-0.1243	0.01904	V
YMR243C_dma3819_DMA30 (ZRC1)	FIG2	-0.1242	0.01899	III
YER134C_sn3580	PIR1	-0.1242	0.0003916	IV
YKL015W_sn1935 (PUT3)	PST1	-0.1242	0.03408	III
YNR003C_tsa640_TSA26 (RPC34)	SRL1	-0.1242	8.27e-16	II
YNR043W_tsq828 (MVD1)	HSP150	-0.1241	1.06e-10	IV
YGR181W_sn2274 (TIM13)	SED1	-0.1241	0.003163	IV
YNL262W_tsq20 (POL2)	CIS3	-0.124	0.005814	III
YKL172W_tsq529 (EBP2)	DSE2	-0.124	3.14e-38	V
YEL002C_tsq590 (WBP1)	SED1	-0.124	0.002321	IV
YER125W_tsa182_TSA26 (RSP5)	SRL1	-0.124	0.002098	II
YBL100C_dma177_DMA30	FLO10	-0.1239	0	III
YDL207W_tsq923 (GLE1)	SPS22	-0.1239	0.01414	IV
YDR238C_tsq721 (SEC26)	FLO1	-0.1238	0.04225	III
YLR337C_dma3380_DMA30 (VRP1)	HSP150	-0.1238	0.0002752	IV
YFL034C-B_tsa788_TSA26 (MOB2)	CCW12	-0.1237	0.04527	I
YBL006C_sn699 (LDB7)	DSE2	-0.1237	0.02341	V
YGL062W_sn2852 (PYC1)	SPS2	-0.1237	0.01193	IV
YLR274W_tsa403_TSA26 (MCM5)	PIR3	-0.1236	0.04428	IV
YHR043C_sn2968 (DOG2)	CWP1	-0.1235	0.04989	IV
YHR043C_sn2968 (DOG2)	CWP2	-0.1235	0.04989	IV
YGL257C_dma1765_DMA30 (MNT2)	SED1	-0.1235	0.01834	IV
YOR089C_sn430 (VPS21)	SPS22	-0.1235	0.02303	IV
YFL034C-B_tsq1240 (MOB2)	CCW12	-0.1234	0.0005454	I
YCR052W_tsq1433 (RSC6)	CIS3	-0.1234	0.01941	III
YPR089W_dma5081_DMA30	FIT3	-0.1234	0.00113	IV
YDR116C_dma903_DMA30 (MRPL1)	TIR2	-0.1234	0.04215	IV
YDL143W_tsq729 (CCT4)	DSE2	-0.1233	0.007294	V
YEL032W_tsq1075 (MCM3)	ECM33	-0.1233	0.002336	VI
YGL009C_dma1607_DMA30 (LEU1)	SUN4	-0.1233	6.1e-05	V
YGL047W_tsq1419 (ALG13)	CWP1	-0.1232	0.04454	IV
YGL047W_tsq1419 (ALG13)	CWP2	-0.1232	0.04454	IV
YMR230W-A_sn4579	ECM33	-0.1232	0.005251	VI
YLR291C_damp789 (GCD7)	FLO1	-0.1232	1.43e-12	III
YOL073C_dma5335_DMA30 (DSC2)	FLO10	-0.1232	0.04781	III
YDR069C_sn176 (DOA4)	PIR3	-0.1232	5.56e-07	IV
YGR133W_dma1894_DMA30 (PEX4)	SPS2	-0.1232	0.02229	IV
YLL001W_dma3034_DMA30 (DNM1)	SPS22	-0.1232	0.009513	IV
YGL263W_dma1782_DMA30 (COS12)	SAG1	-0.1231	0.03958	VII
YIL087C_sn2573 (AIM19)	ECM33	-0.123	0.0409	VI
YGR229C_sn756 (SMI1)	HSP150	-0.123	0.005196	IV
YER059W_dma1366_DMA30 (PCL6)	SUN4	-0.123	0.01714	V
YOR393W_sn2786 (ERR1)	PST1	-0.1229	0.03368	III
YLR120C_dma3214_DMA30	CIS3	-0.1228	0.02343	III
YGR008C_dma1777_DMA30 (STF2)	FIT2	-0.1228	0.04536	III
YKL096C-B_sn4544	FLO1	-0.1228	0.046	III
YHR062C_damp561 (RPP1)	CCW12	-0.1227	2.95e-06	I
YBR066C_dma233_DMA30 (NRG2)	CIS3	-0.1227	4.97e-05	III
YGL068W_damp476 (MNP1)	FLO1	-0.1227	0.02428	III
YJR060W_sn154 (CBF1)	TIR4	-0.1227	0.0399	IV
YBR071W_dma229_DMA30	CCW14	-0.1226	1.22e-12	II
YMR159C_dma3767_DMA30 (ATG16)	FLO10	-0.1225	0.01462	III
YML015C_tsq1143 (TAF11)	FLO11	-0.1225	0.02959	II
YDR084C_sn48 (TVP23)	PIR3	-0.1225	0.03394	IV
YOR236W_tsa884_TSA26 (DFR1)	PST1	-0.1225	0.02837	III
YCL043C_damp250 (PDI1)	SED1	-0.1225	0.0195	IV
YLR159W_sn3300	CWP1	-0.1224	0.04169	IV
YMR164C_sn978 (MSS11)	CCW12	-0.1223	0.03063	I
YFL034C-B_tsa609_TSA26 (MOB2)	CCW12	-0.1223	0.04144	I
YDR067C_dma857_DMA30 (OCA6)	CIS3	-0.1223	0.004007	III
YPL209C_tsq1091 (IPL1)	PIR1	-0.1223	7.86e-28	IV
[truncated: 21,528 more rows]

[truncated: 1 more sheets: Table S11]
